# Supplementary material for: One-Pot Phosphonylation of Heteroaromatic Lithium Reagents: The Scope and Limitations of Its Use for the Synthesis of Heteroaromatic Phosphonates
Source: MDPI journal article supplement (doi:10.3390/molecules28073135), 2023-03-31
Supplement: s1 [file s1]

## Supporting Information for

# One-Pot Phosphonylation of Heteroaromatic Lithium Reagents: The Scope and Limitations of Its Use for the Synthesis of Heteroaromatic Phosphonates

Ewa Chmielewska <sup>1,\*</sup>, Natalia Miodowska <sup>1</sup>, Błażej Dziuk <sup>2</sup>, Mateusz Psurski <sup>3</sup> and Paweł Kafarski <sup>4</sup>

<sup>1</sup> Department of Bioorganic Chemistry, Faculty of Chemistry, Wrocław University of Science and Technology, Wybrzeże Wyspiańskiego 27, 50-370 Wrocław, Poland; natalia.miodowska@pwr.edu.pl

<sup>2</sup> Department of Inorganic and Structural Chemistry, Faculty of Chemistry, University of Opole, ul. Oleska 48, 45-052 Opole, Poland; bdziuk@uni.opole.pl

<sup>3</sup> Laboratory of Experimental Anticancer Therapy, Department Of Experimental Oncology, Ludwik Hirszfeld Institute of Immunology and Experimental Therapy Polish Academy of Sciences, Rudolfa Weigla 12, 53-114 Wrocław, Poland; mateusz.psurski@hirszfild.pl

<sup>4</sup> Department of Chemistry, Faculty of Agriculture and Forestry, University of Warmia and Mazury, Plac Łódzki 4, 10-721 Olsztyn, Poland; pawel.kafarski@uwm.edu.pl

\* Correspondence: ewa.chmielewska@pwr.edu.pl; Tel.: +48-71-320 2977

## Copies of <sup>31</sup>P NMR, <sup>1</sup>H NMR, <sup>13</sup>C NMR, MS spectra for representative compounds and relevant crystallographic data for the molecule and the full geometrical information

### Table of contents

|                                                                                                                                                                               |    |
|-------------------------------------------------------------------------------------------------------------------------------------------------------------------------------|----|
| <i>Diethyl 1H-indol-2-ylphosphonate (1)</i> – <sup>31</sup> P NMR, <sup>1</sup> H NMR, <sup>13</sup> C NMR, MS, .....                                                         | 2  |
| <i>1H-indolin-2-ylphosphonic acid (4)</i> - <sup>31</sup> P NMR, <sup>1</sup> H NMR, <sup>13</sup> C NMR, MS.....                                                             | 5  |
| <i>Benzo[b]tiophen-2-ylphosphonic acid (8)</i> - <sup>31</sup> P NMR, <sup>1</sup> H NMR, <sup>13</sup> C NMR, MS.....                                                        | 7  |
| <i>Diethyl phenylphosphonate (21)</i> - <sup>31</sup> P NMR, <sup>1</sup> H NMR, <sup>13</sup> C NMR, MS .....                                                                | 9  |
| <i>Phenylphosphonic acid (24)</i> - <sup>31</sup> P NMR, <sup>1</sup> H NMR, <sup>13</sup> C NMR, MS.....                                                                     | 11 |
| <i>Diethyl 3-methoxyphenylphosphonate (22)</i> - <sup>31</sup> P NMR, <sup>1</sup> H NMR, <sup>13</sup> C NMR, MS.....                                                        | 13 |
| <i>3-Methoxyphenylphosphonic acid (25)</i> - <sup>31</sup> P NMR, <sup>1</sup> H NMR, <sup>13</sup> C NMR, MS.....                                                            | 16 |
| <i>Naphth-1-ylphosphonic acid (26)</i> - <sup>31</sup> P NMR, <sup>1</sup> H NMR, <sup>13</sup> C NMR, MS.....                                                                | 18 |
| <i>Benzo[b]thiazol-2-ylphosphonic acid (7)</i> - <sup>31</sup> P NMR, <sup>1</sup> H NMR, <sup>13</sup> C NMR, MS.....                                                        | 20 |
| <i>Mixture of compounds 18, 19 and 20</i> - <sup>31</sup> P NMR, <sup>1</sup> H NMR, <sup>13</sup> C NMR, HMBC(H-P).....                                                      | 23 |
| <i>Ethyl bis(N-methylpyrrol-2-yl)phosphinate (19)</i> MS .....                                                                                                                | 26 |
| <i>Mixture of diethyl benzofuran-2-ylphosphonate (10) and diethyl benzofuran-2-ylphosphinate (11)</i> - <sup>31</sup> P NMR, <sup>1</sup> H NMR, <sup>13</sup> C NMR, MS..... | 26 |
| <i>Mixture of tri-2-benzofuryl phosphine (12) and its oxide (13)</i> - <sup>31</sup> P NMR, <sup>1</sup> H NMR, <sup>13</sup> C NMR, C-H, H-P, MS.....                        | 28 |
| <i>Tri-2-benzofuryl phosphine oxide (13)</i> - <sup>31</sup> P NMR, <sup>1</sup> H NMR, <sup>13</sup> C NMR, MS.....                                                          | 32 |

|                                                                                                   |                                                                          |           |
|---------------------------------------------------------------------------------------------------|--------------------------------------------------------------------------|-----------|
| <b><i>Tri-2-furyl phosphine oxide (15)</i></b>                                                    | <sup>31</sup> P NMR, <sup>1</sup> H NMR, <sup>13</sup> C NMR, MS.....    | <b>34</b> |
| <b><i>Benzofuran-2-ylphosphonic acid (14)</i></b>                                                 | - <sup>31</sup> P NMR, <sup>1</sup> H NMR, <sup>13</sup> C NMR, MS ..... | <b>36</b> |
| <b><i>Diethyl 2-methylthiophen-5-yl-phosphonate (16)</i></b>                                      | - <sup>31</sup> P NMR, <sup>1</sup> H NMR, <sup>13</sup> C NMR, MS ..... | <b>38</b> |
| <b><i>2-Methylthiophen-5-yl-phosphonic acid (17)</i></b>                                          | - <sup>31</sup> P NMR, <sup>1</sup> H NMR, <sup>13</sup> C NMR, MS.....  | <b>40</b> |
| <b>Relevant crystallographic data for the molecule and the full geometrical information .....</b> |                                                                          | <b>43</b> |

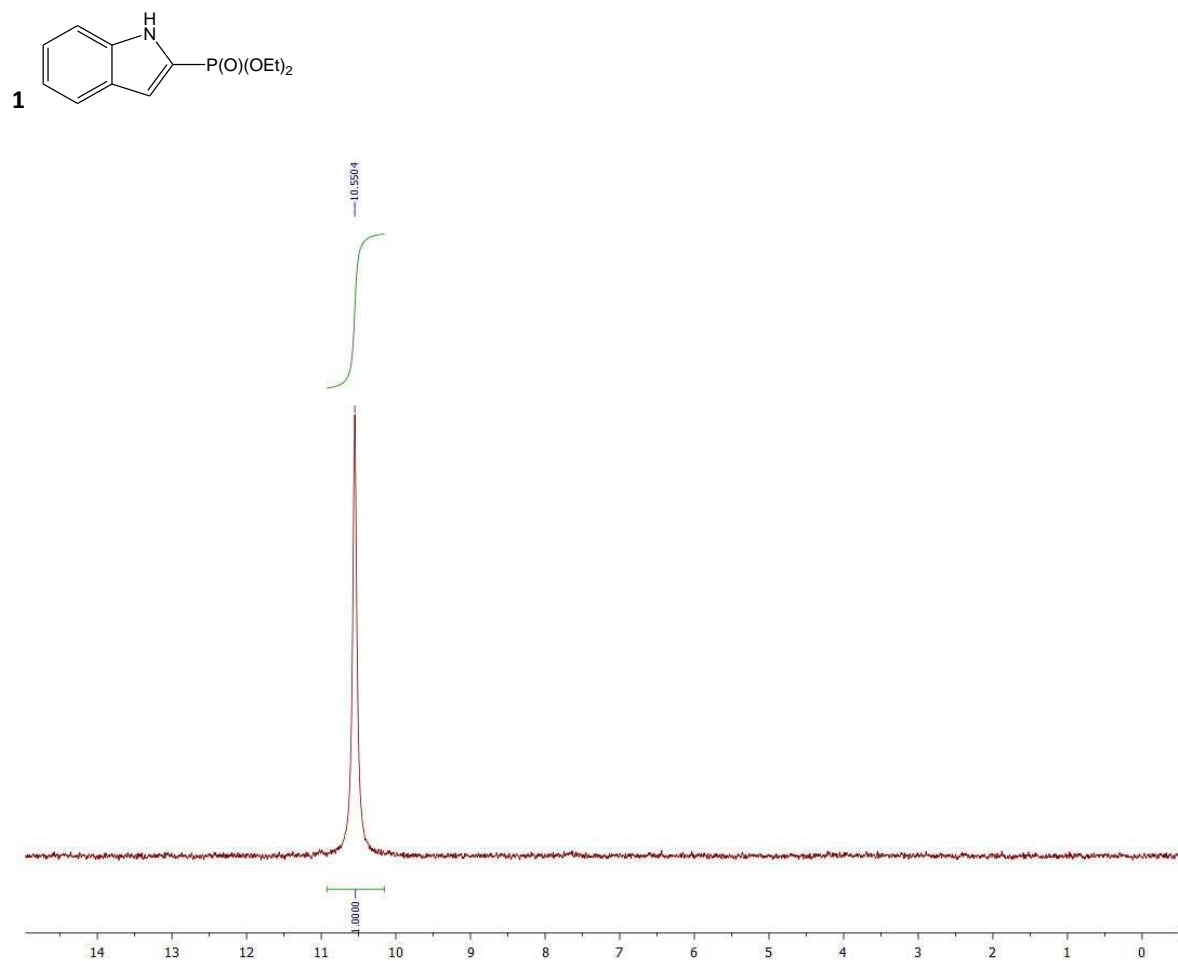

Figure S1: The <sup>31</sup>P NMR spectra of the compound **1**

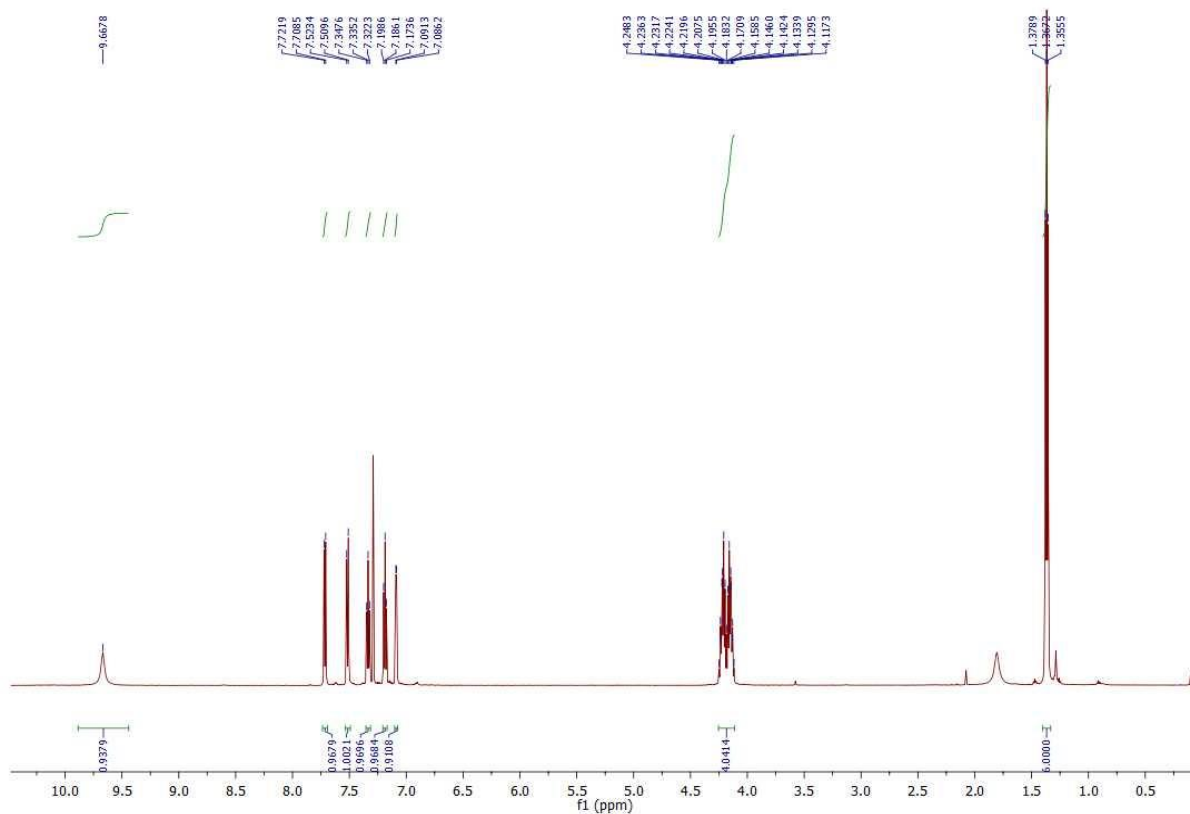

Figure S2: The  $^1\text{H}$  NMR spectra of the compound **1**

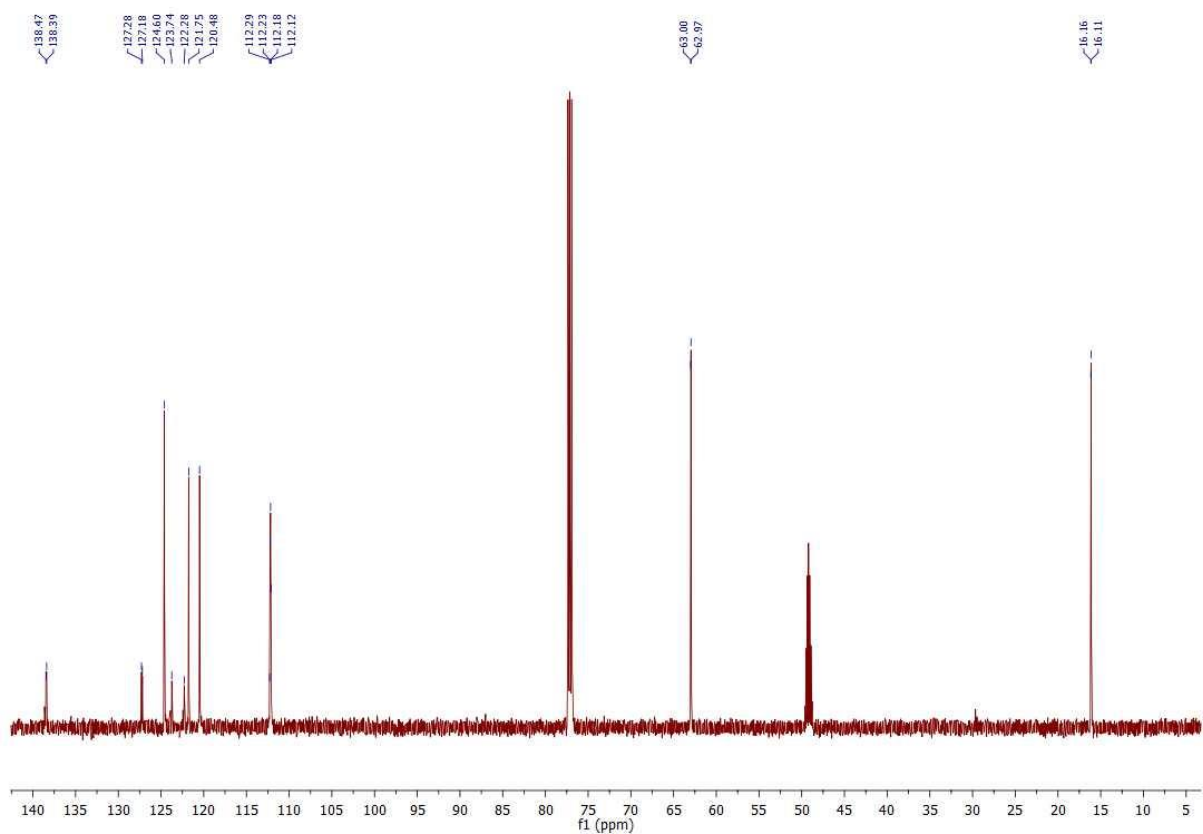

Figure S3: The <sup>13</sup>C NMR spectra of the compound **1**

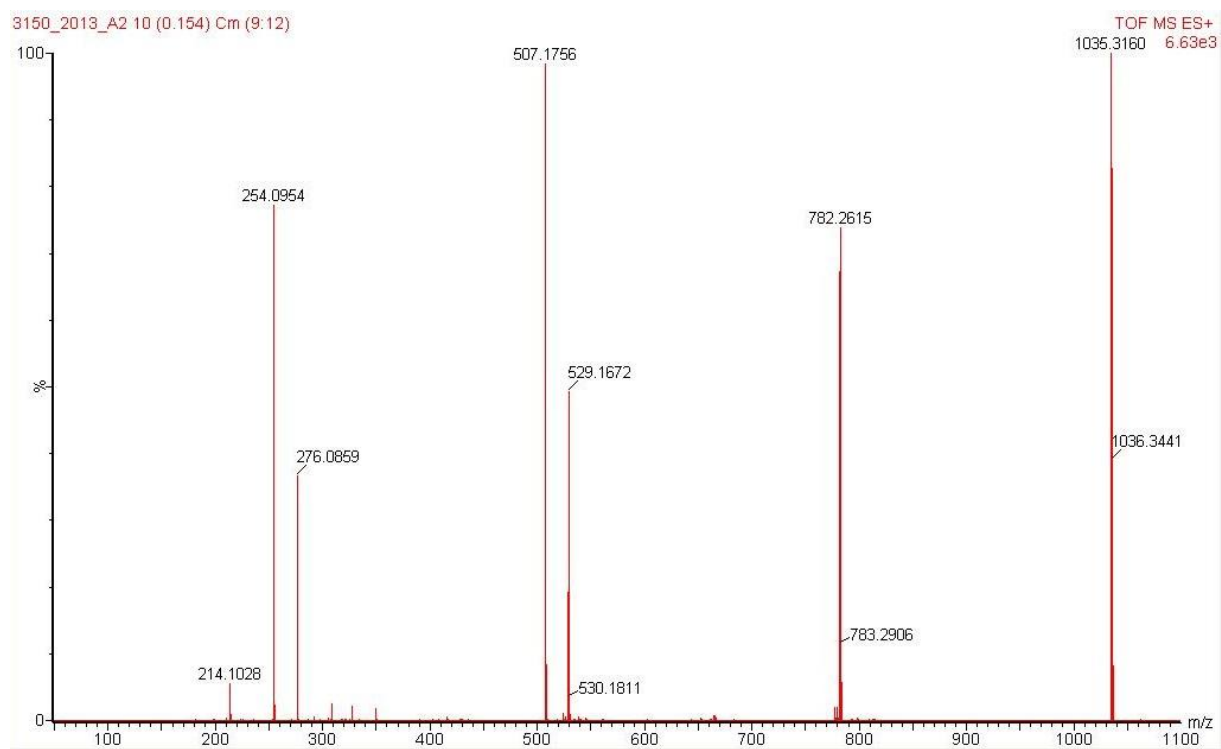

Figure S4: The HRMS spectra of the compound **1**

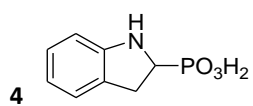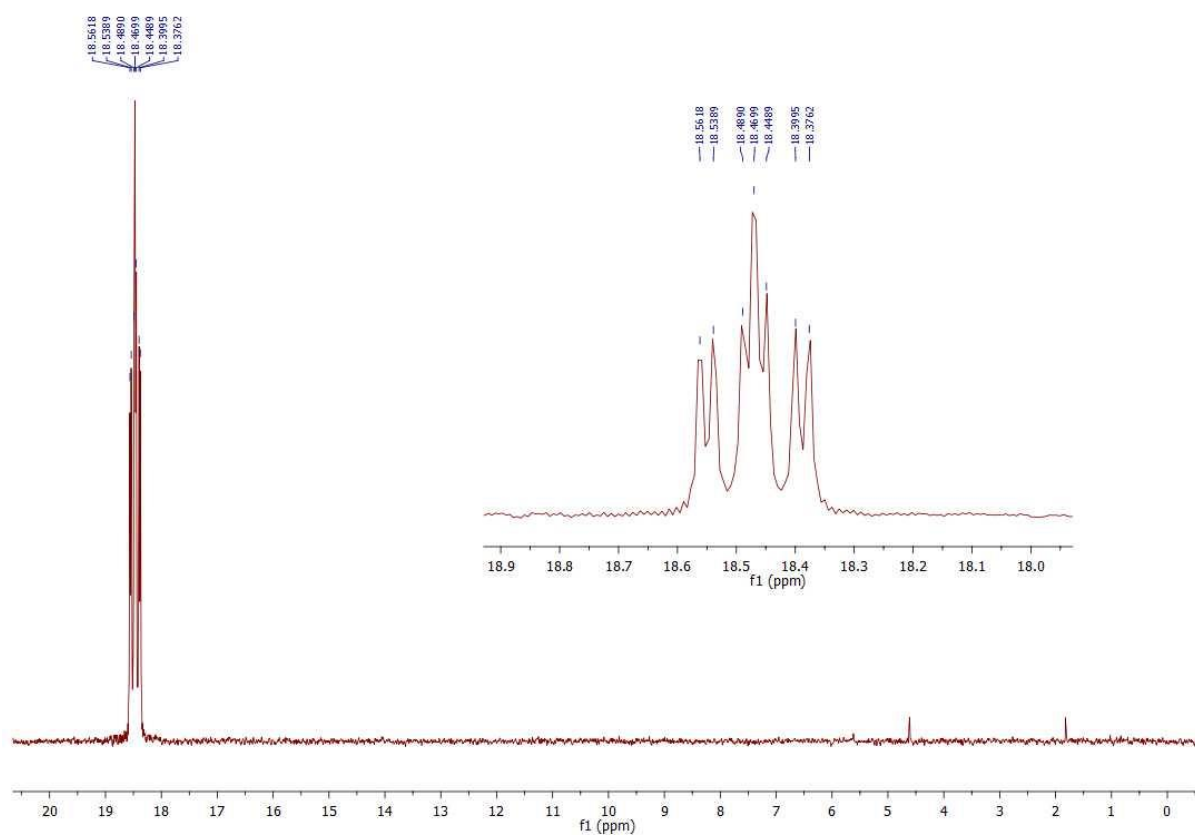

Figure S5: The  $^{31}\text{P}$  NMR spectra of the compound **4**

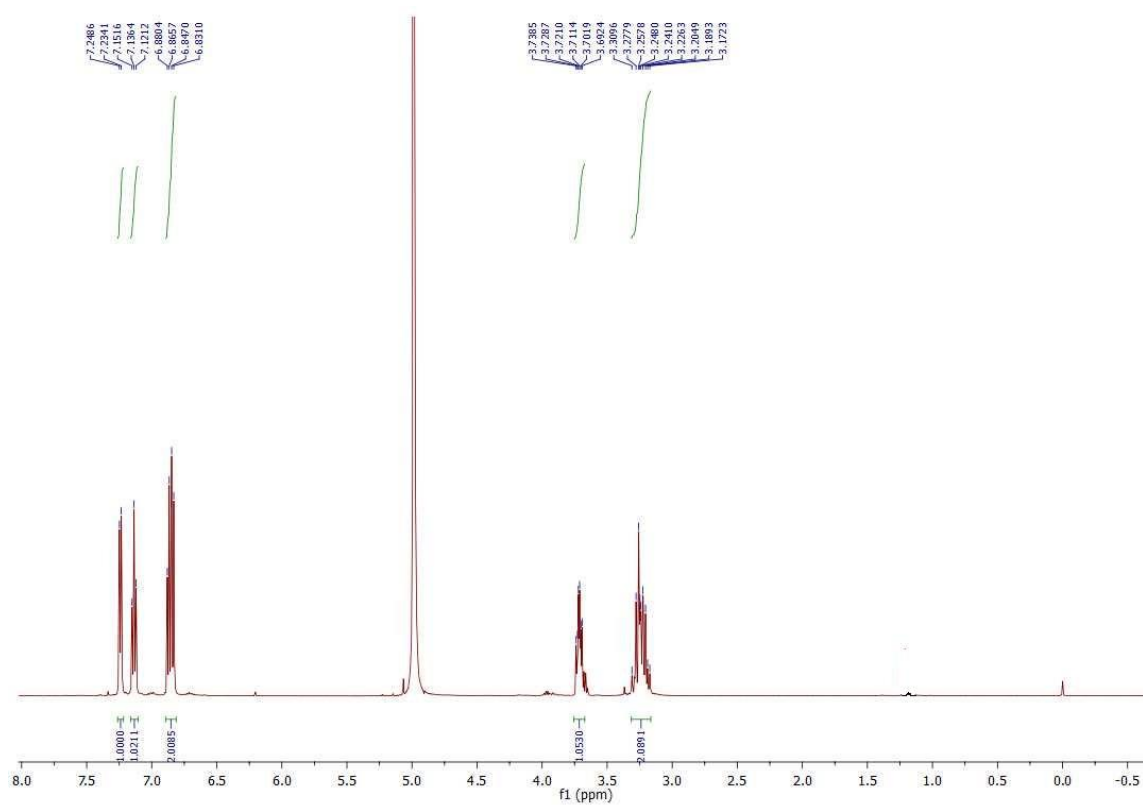

Figure S6: The <sup>1</sup>H NMR spectra of the compound **4**

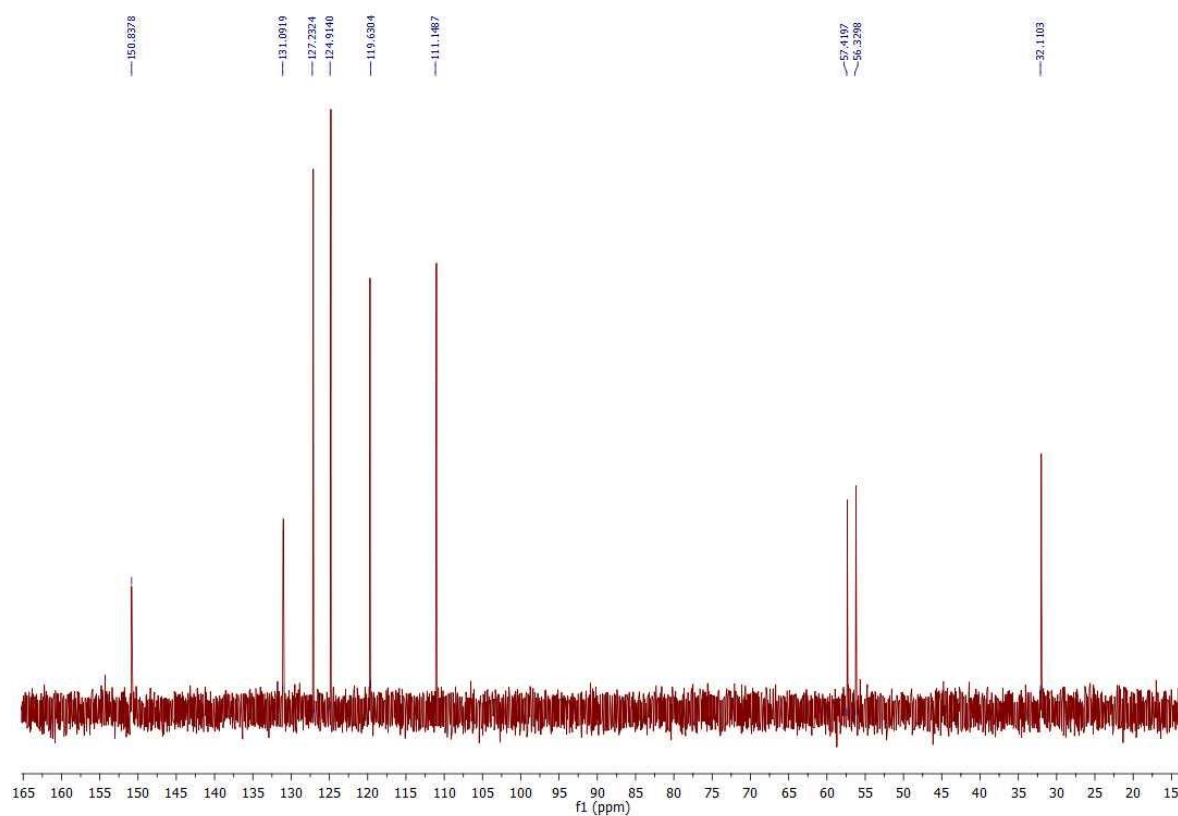

Figure S7: The <sup>13</sup>C NMR spectra of the compound **4**

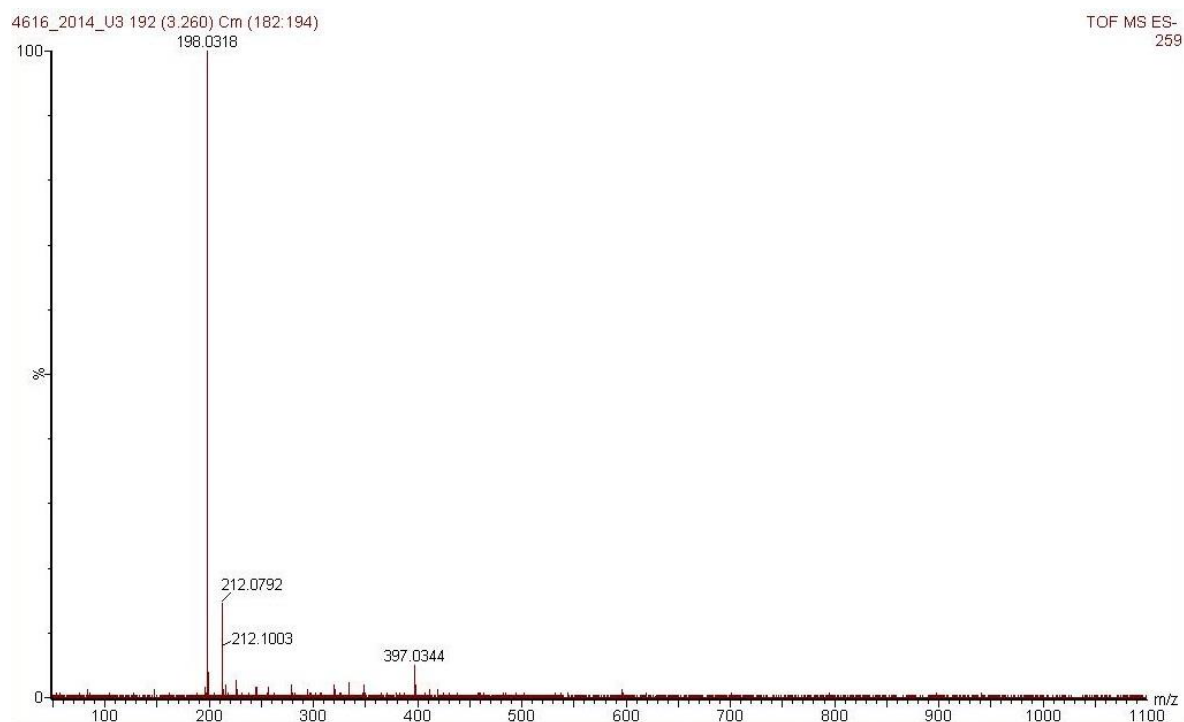

Figure S8: The HRMS spectra of the compound **4**

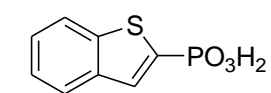

**8**

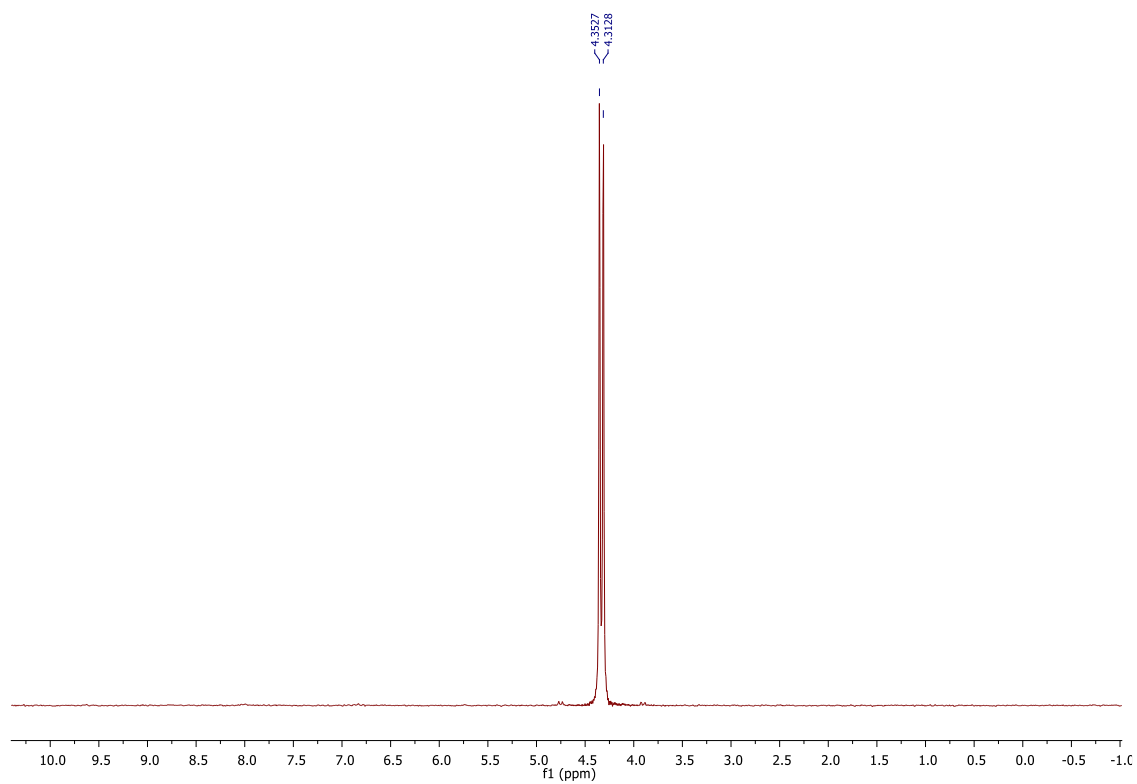

Figure S9: The  $^{31}\text{P}$  NMR spectra of the compound **8**

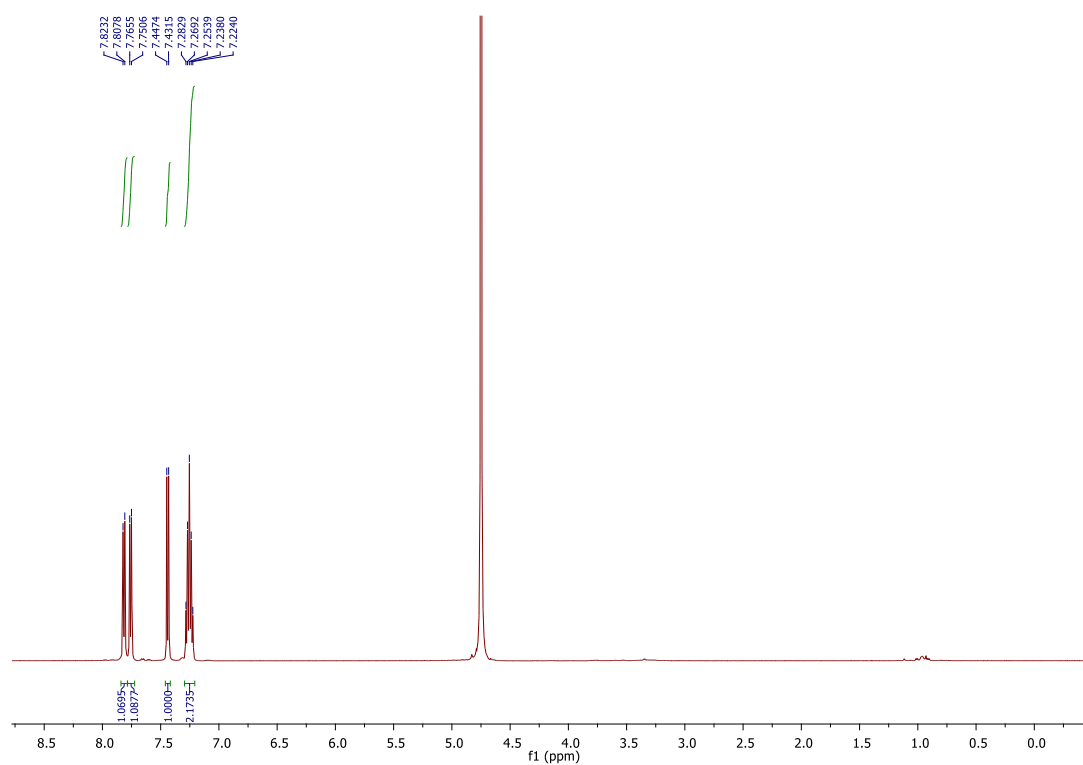

Figure S10: The  $^1\text{H}$  NMR spectra of the compound **8**

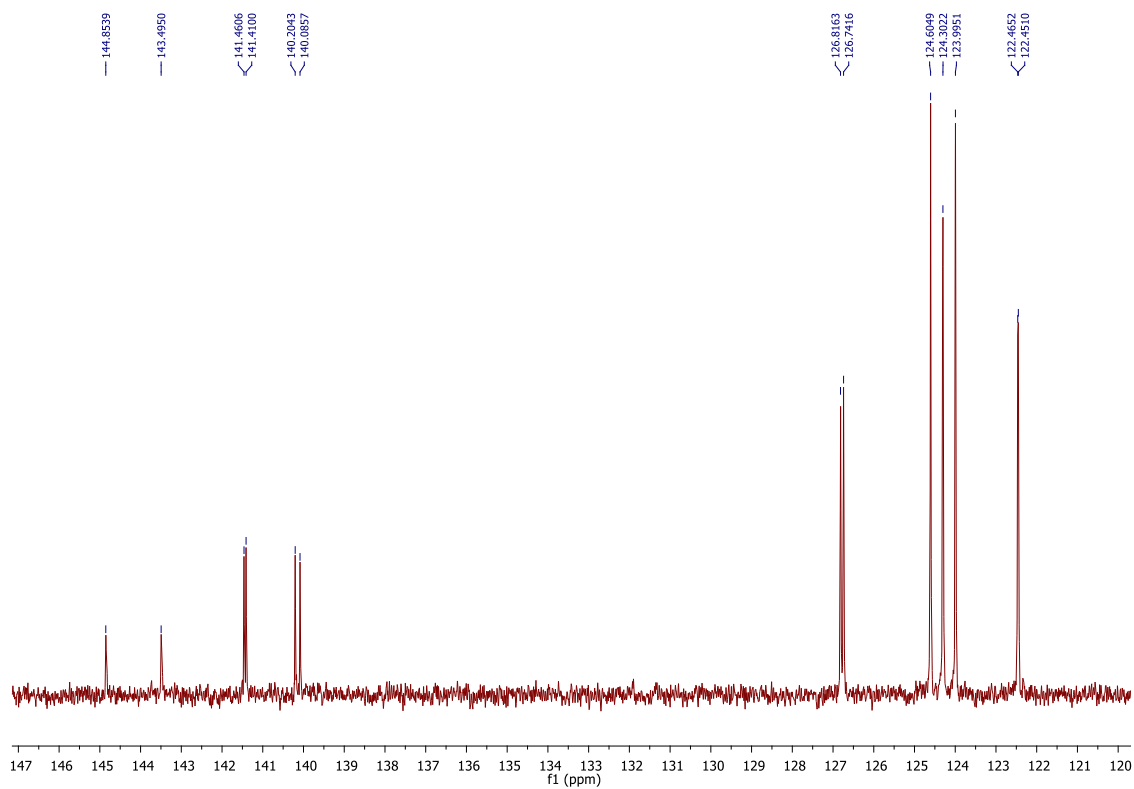

Figure S11: The  $^{13}\text{C}$  NMR spectra of the compound **8**



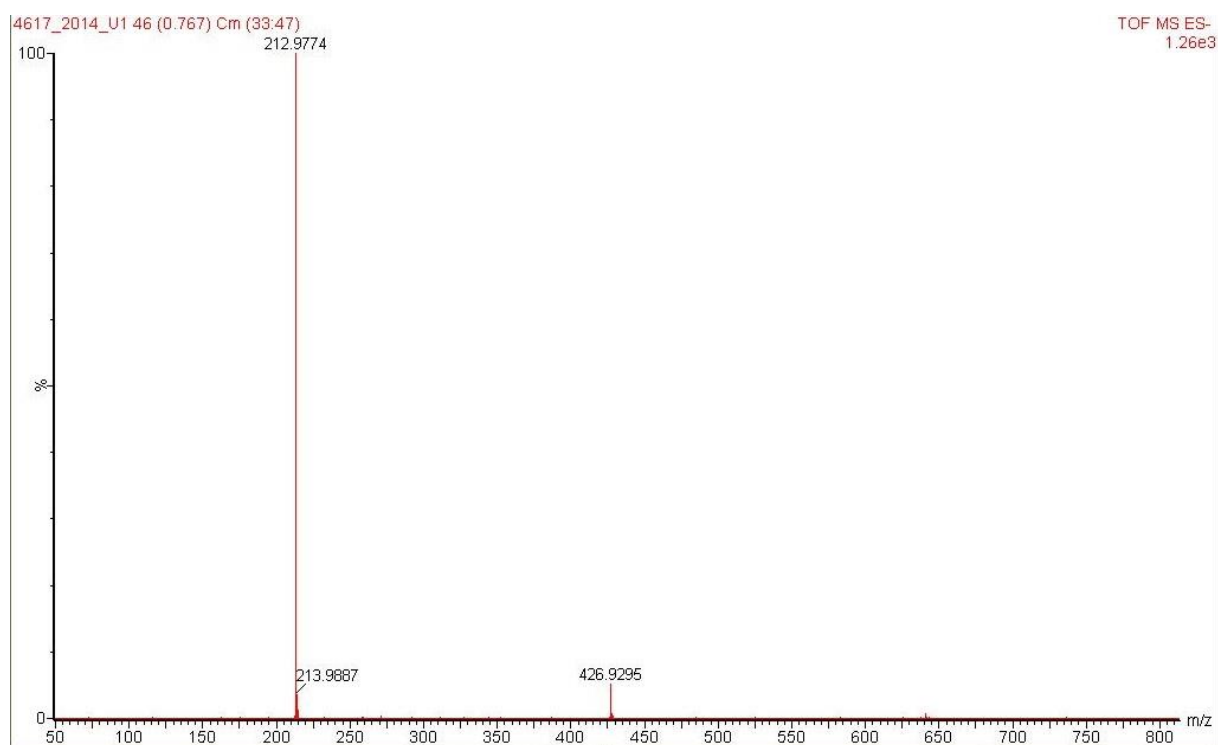

Figure S12: The HRMS spectra of the compound **8**

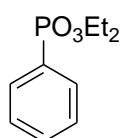

**21**

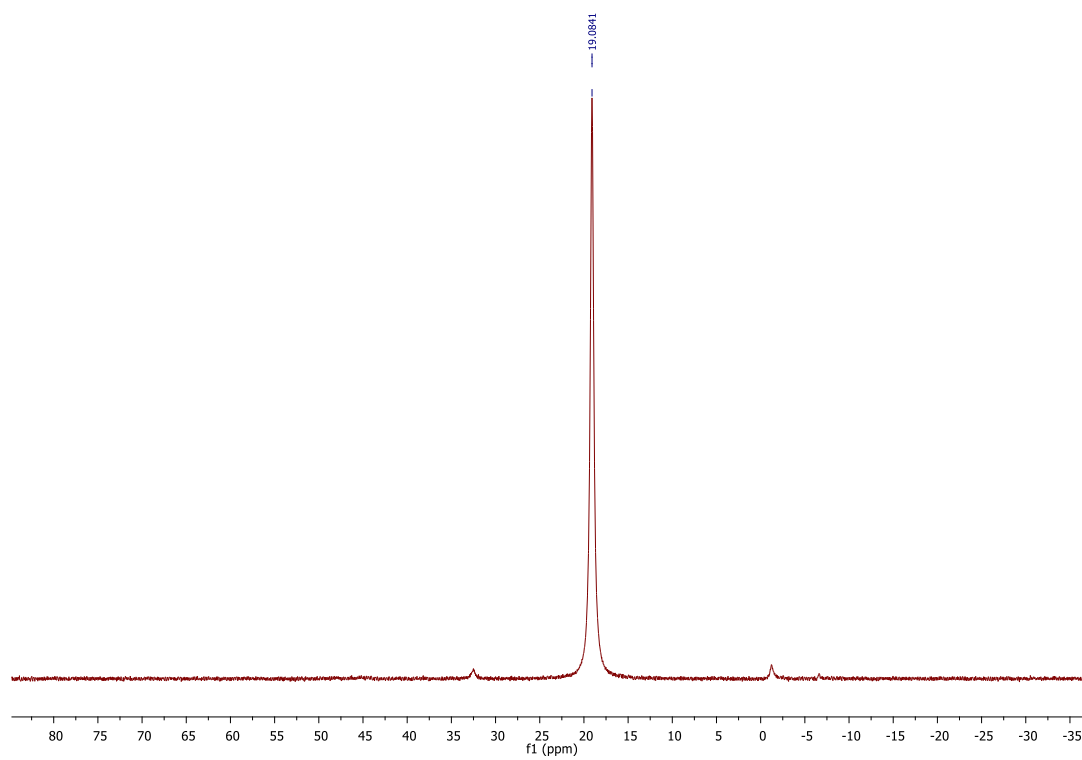

Figure S13: The <sup>31</sup>P NMR spectra of the compound **21**

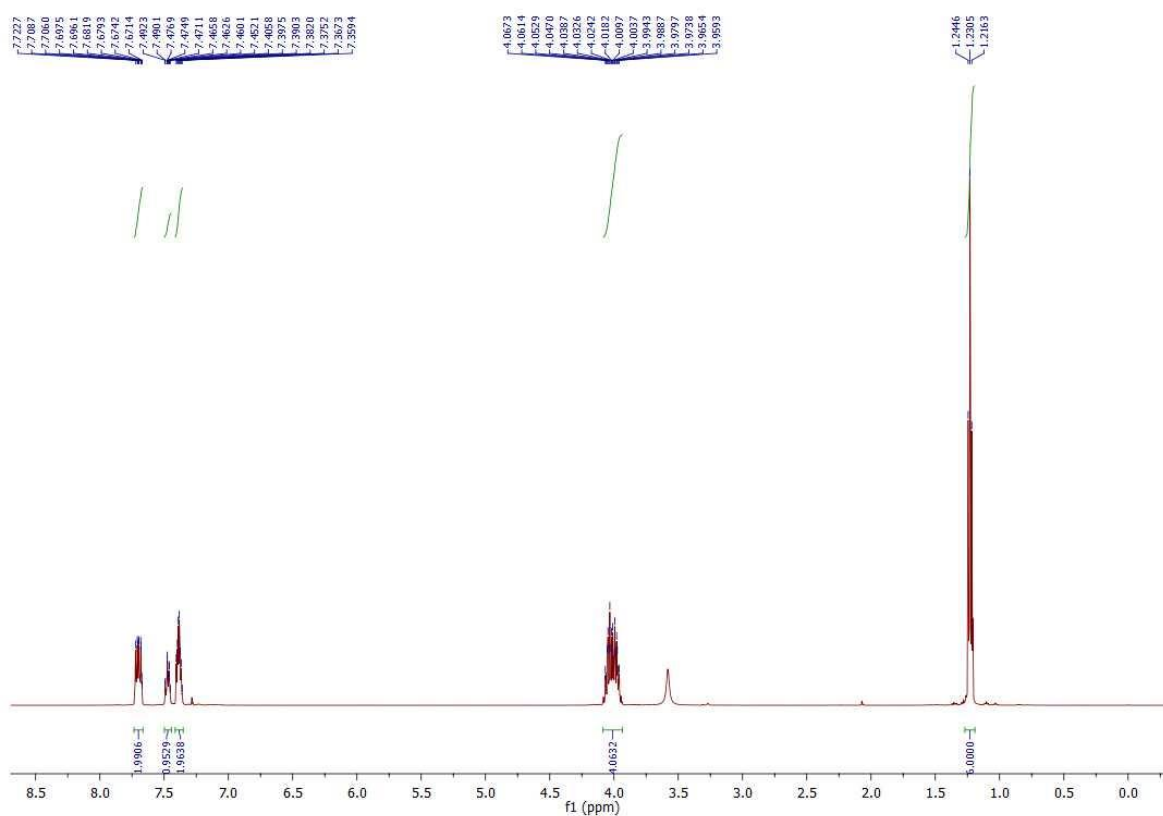

Figure S14: The  $^1\text{H}$  NMR spectra of the compound **21**

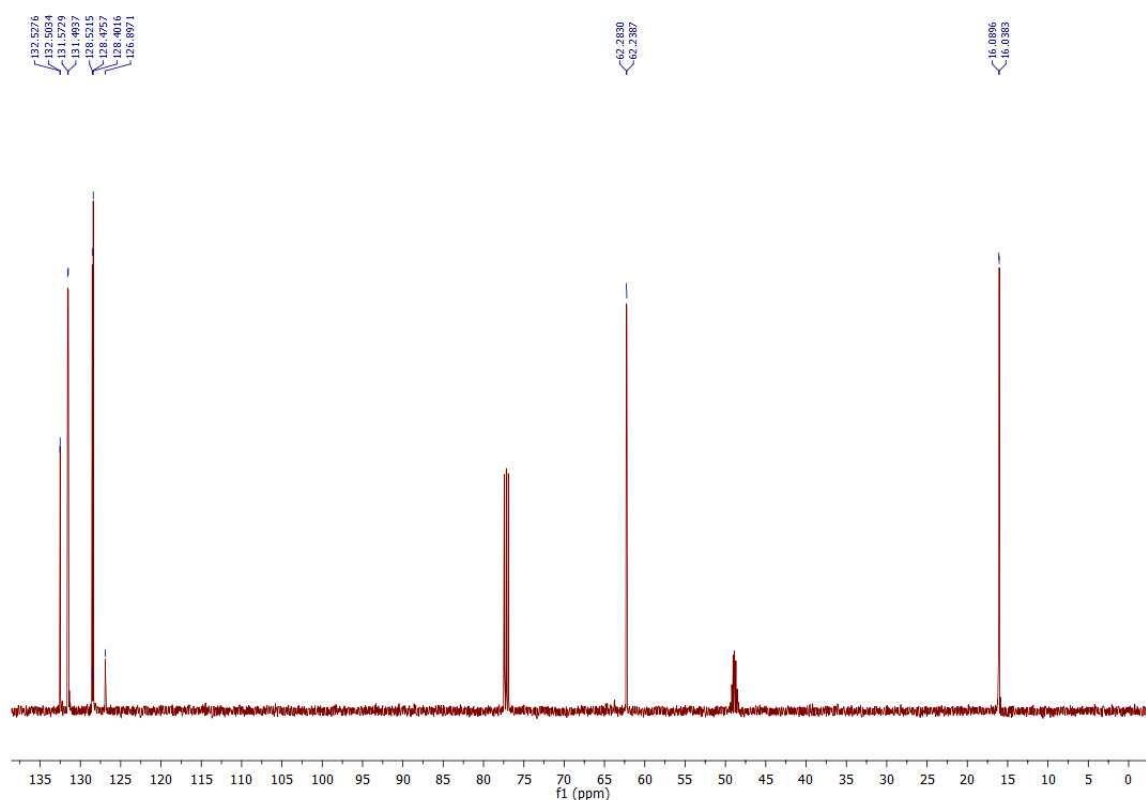

Figure S15: The  $^{13}\text{C}$  NMR spectra of the compound **21**

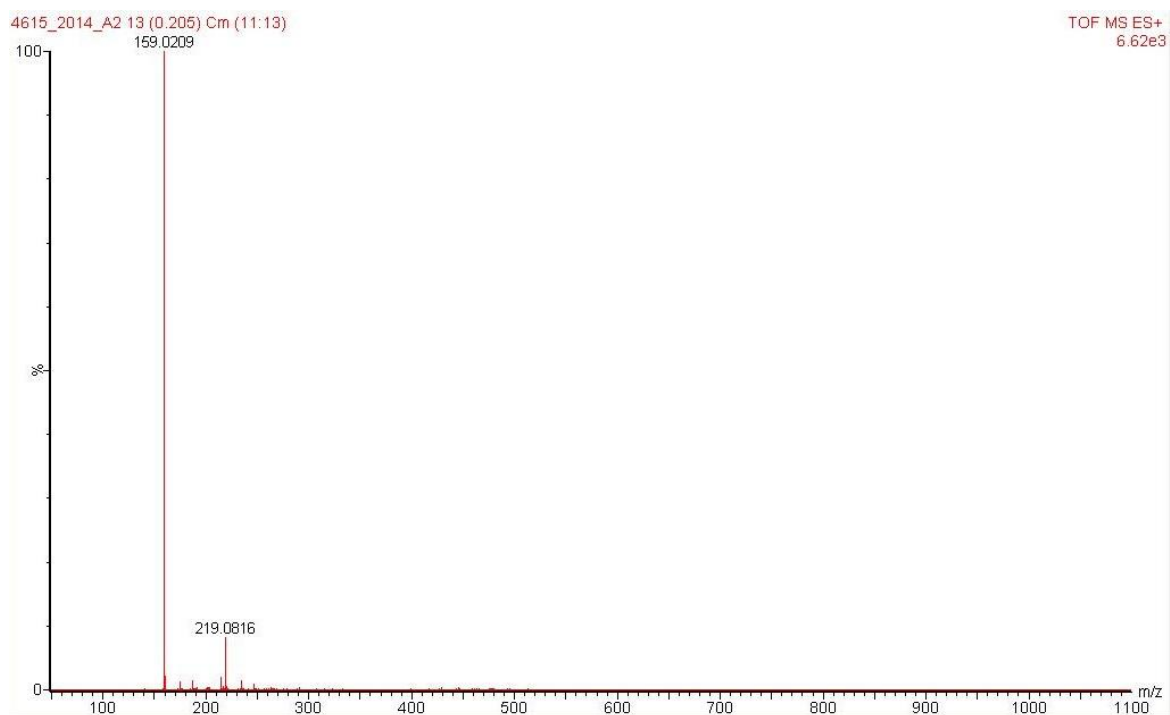

Figure S16: The HRMS spectra of the compound **21**

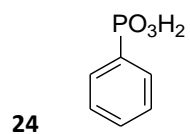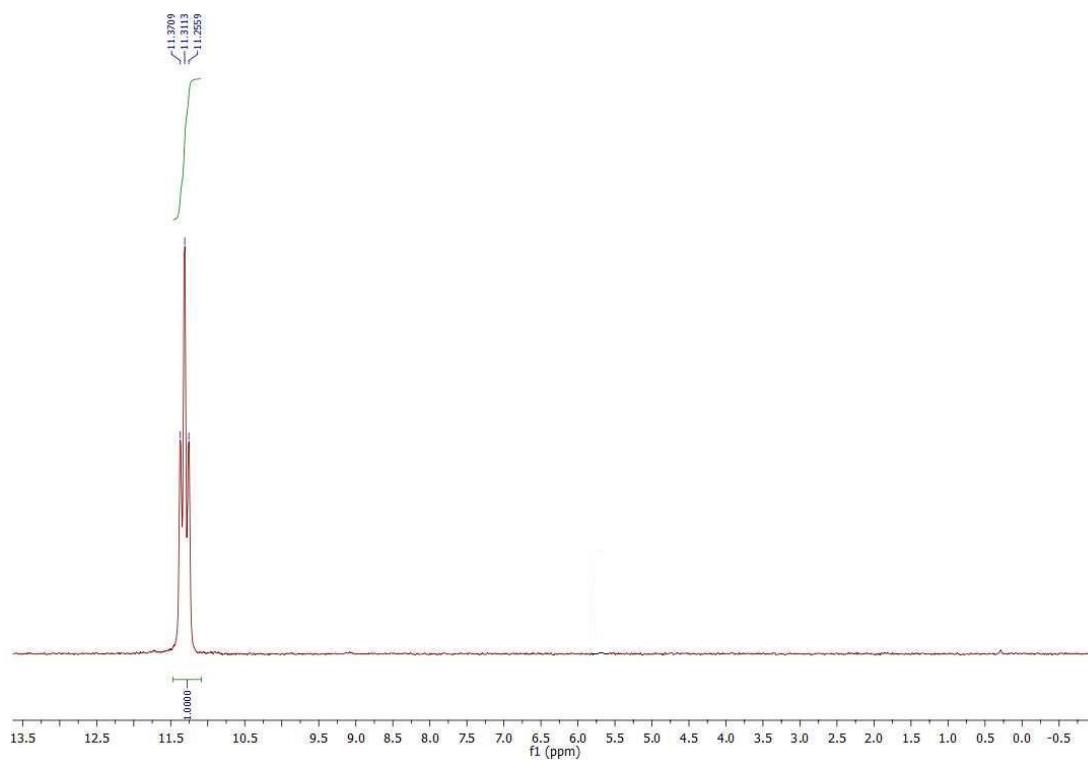

Figure S17: The  $^{31}\text{P}$  NMR spectra of the compound **24**

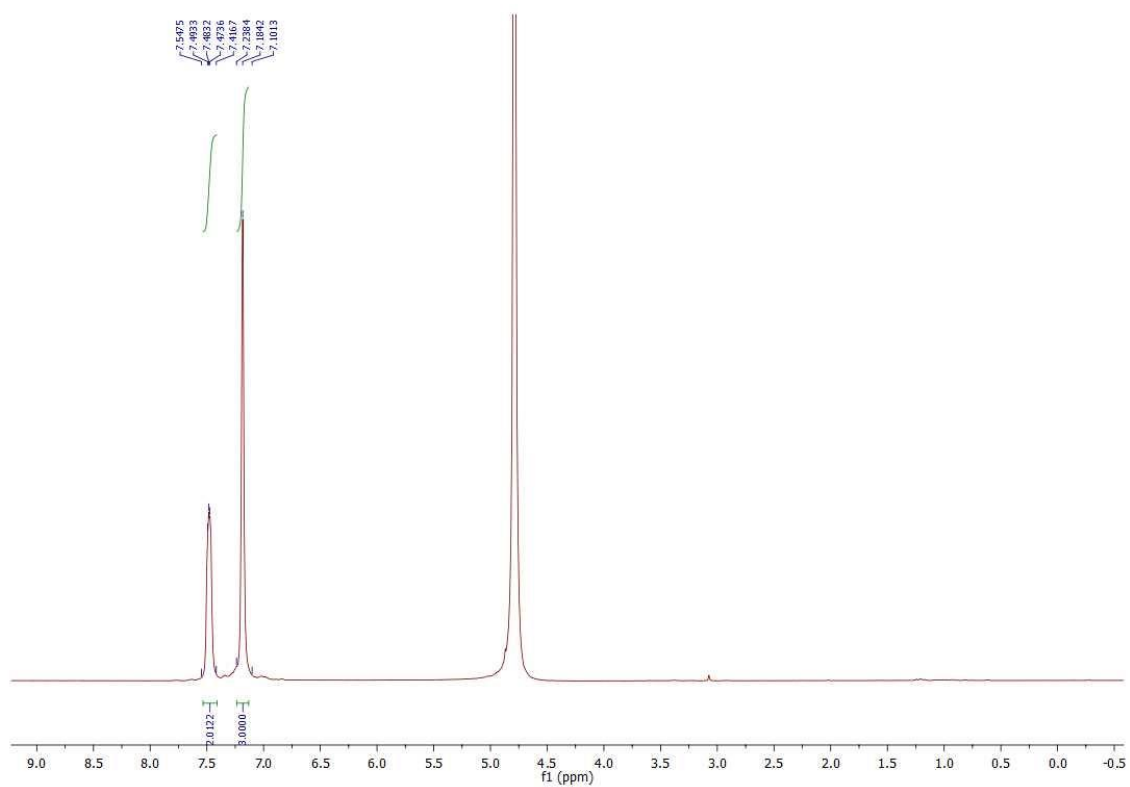

Figure S18: The  $^1\text{H}$  NMR spectra of the compound **24**

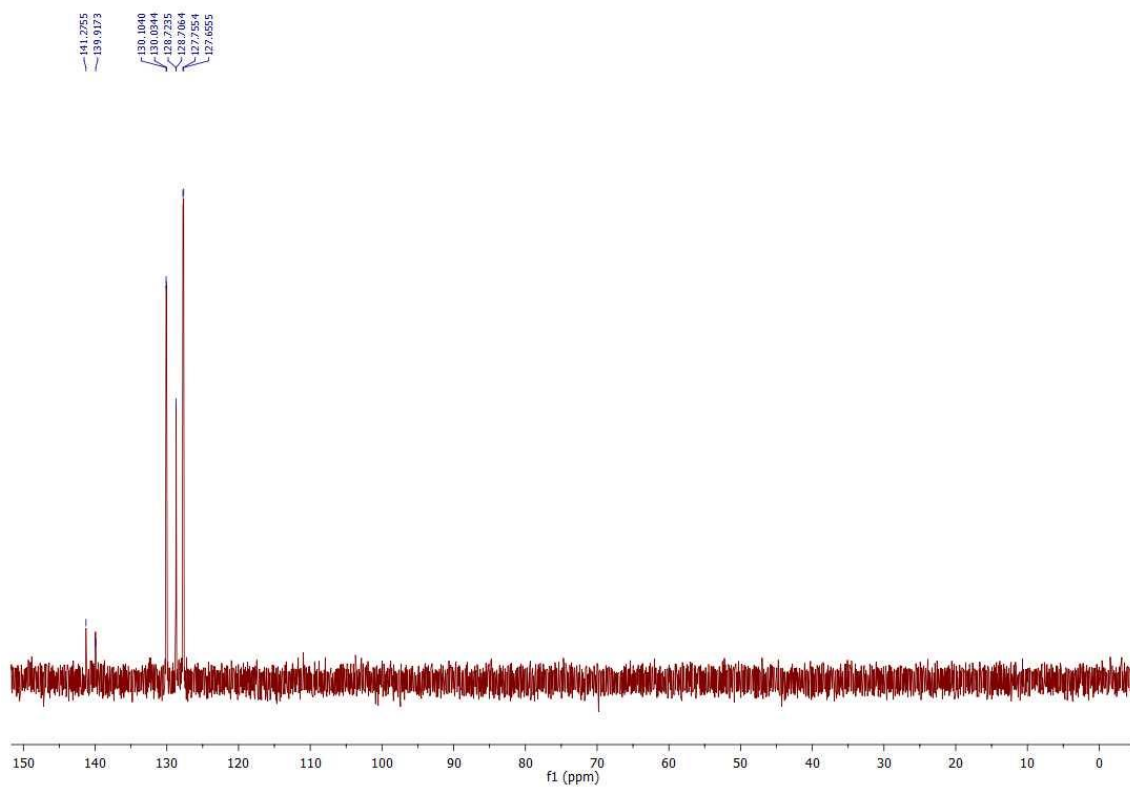

Figure S19: The  $^{13}\text{C}$  NMR spectra of the compound **24**

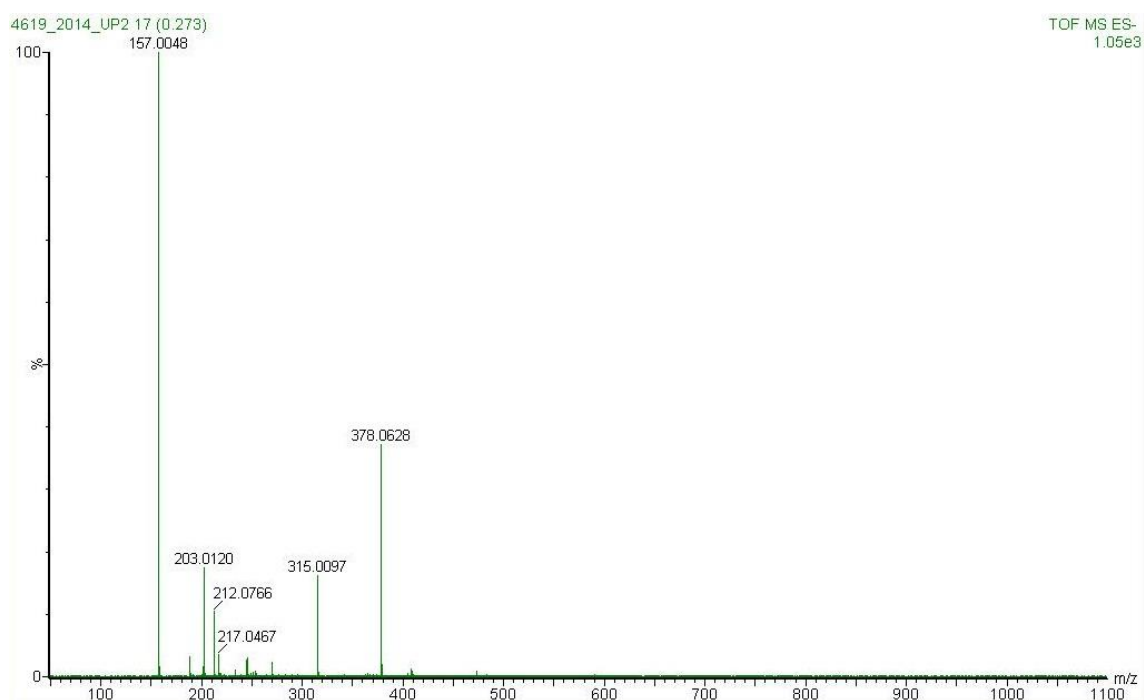

Figure S20: The HRMS spectra of the compound **24**

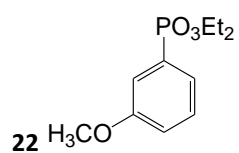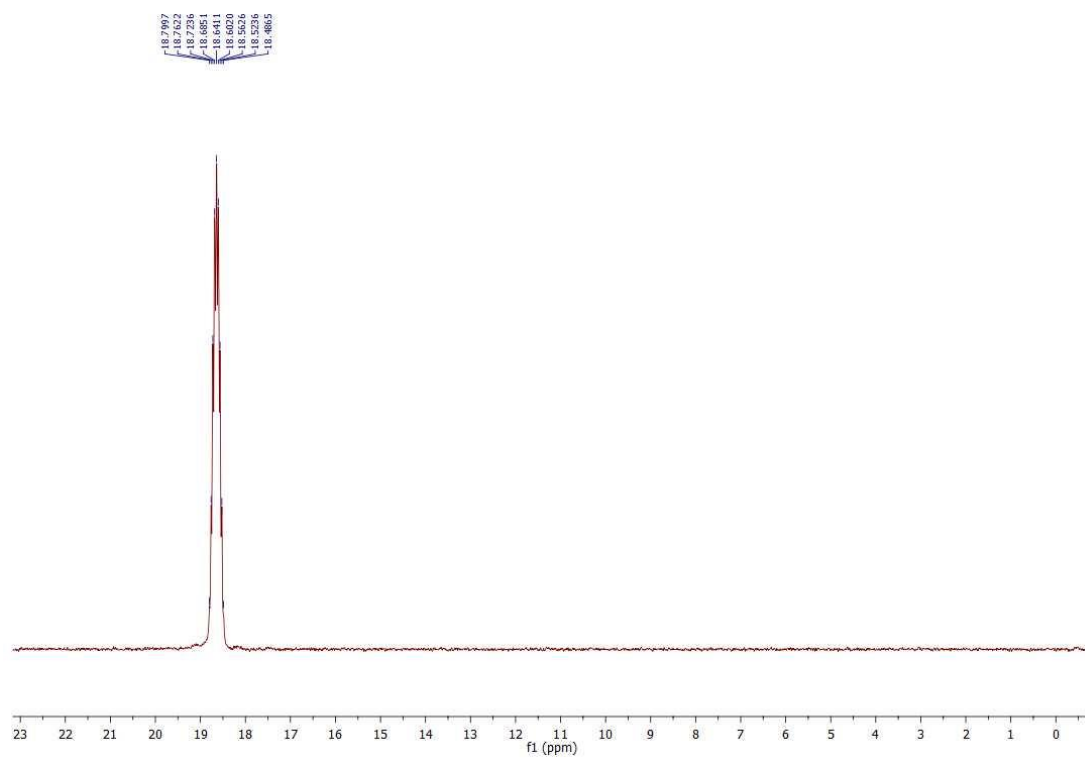

Figure S21: The <sup>31</sup>P NMR spectra of the compound **22**

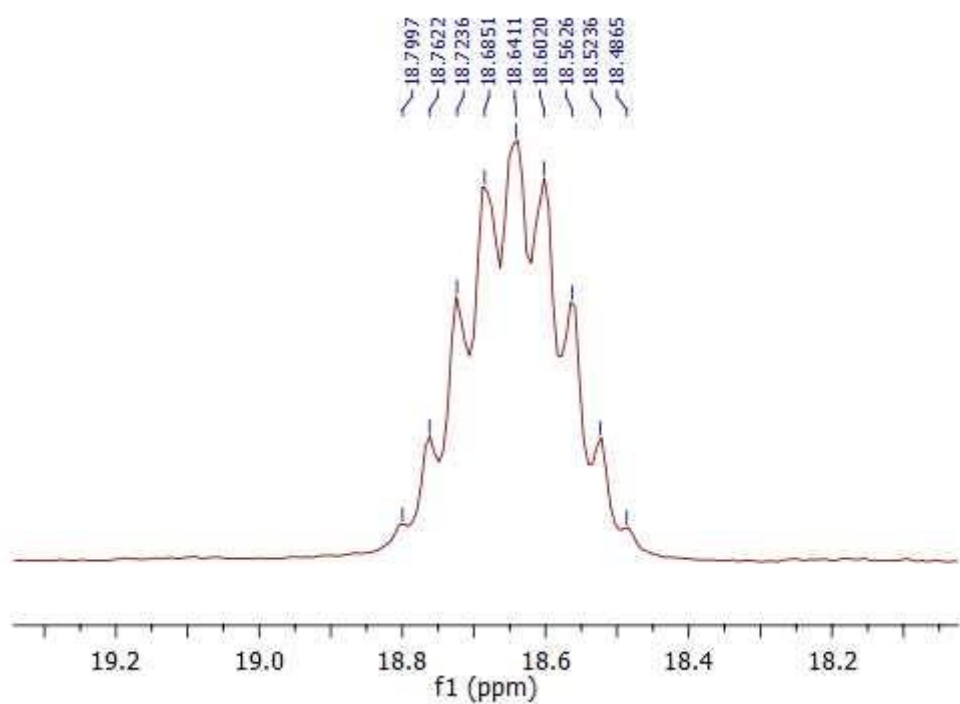

Figure S22: The  $^{31}\text{P}$  NMR spectra of the compound **22**

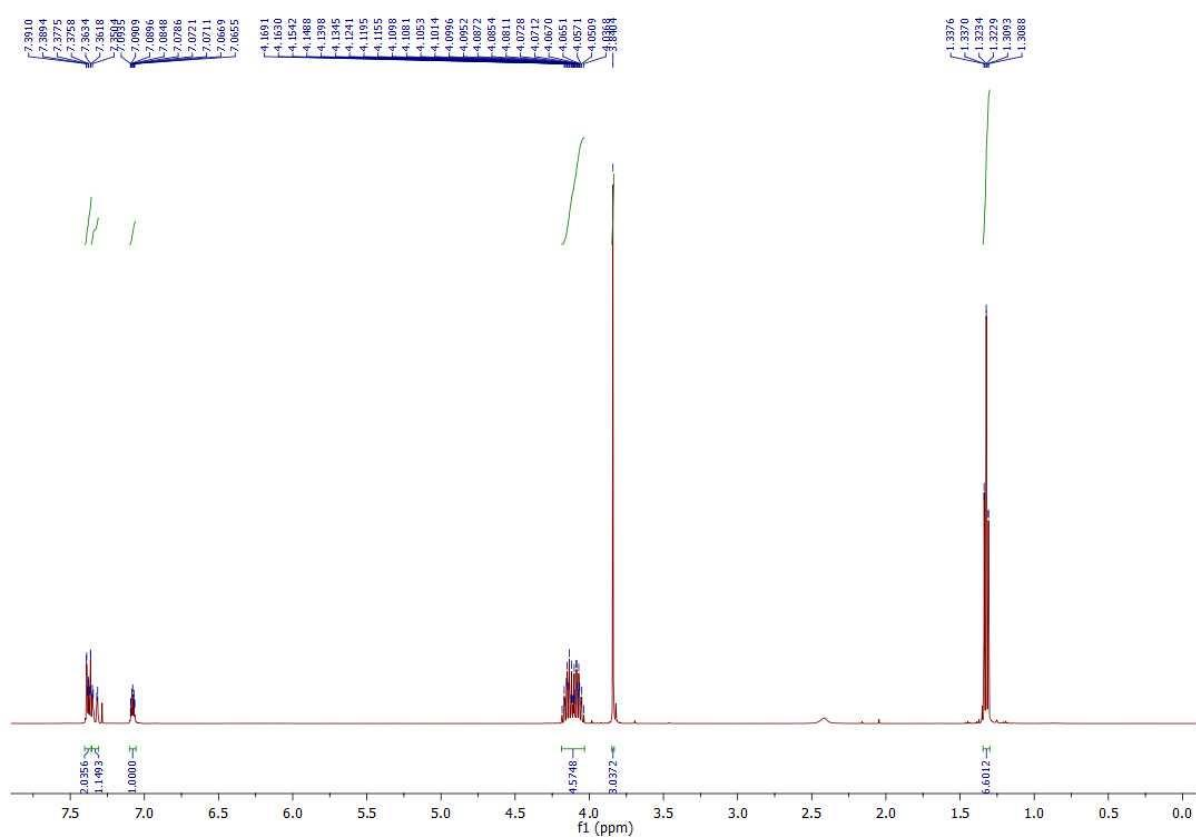

Figure S23: The  $^1\text{H}$  NMR spectra of the compound **22**

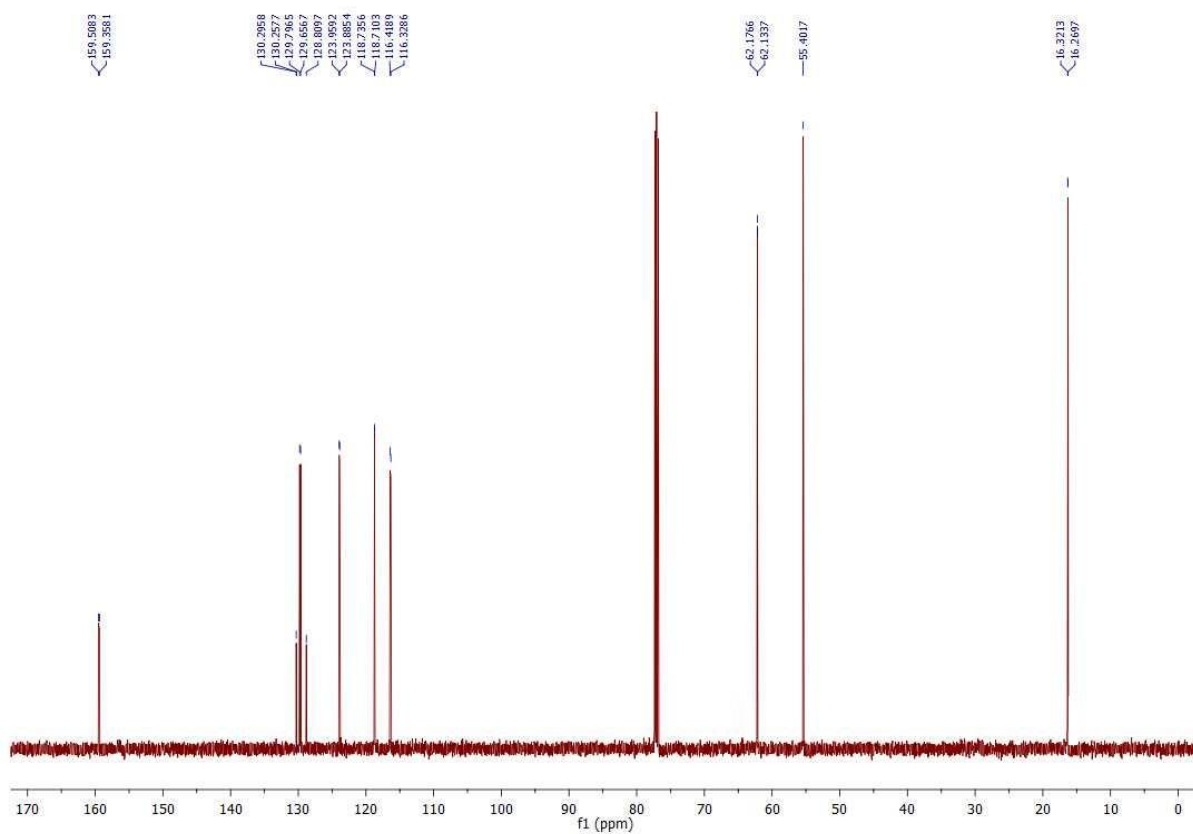

Figure S24: The <sup>13</sup>C NMR spectra of the compound **22**

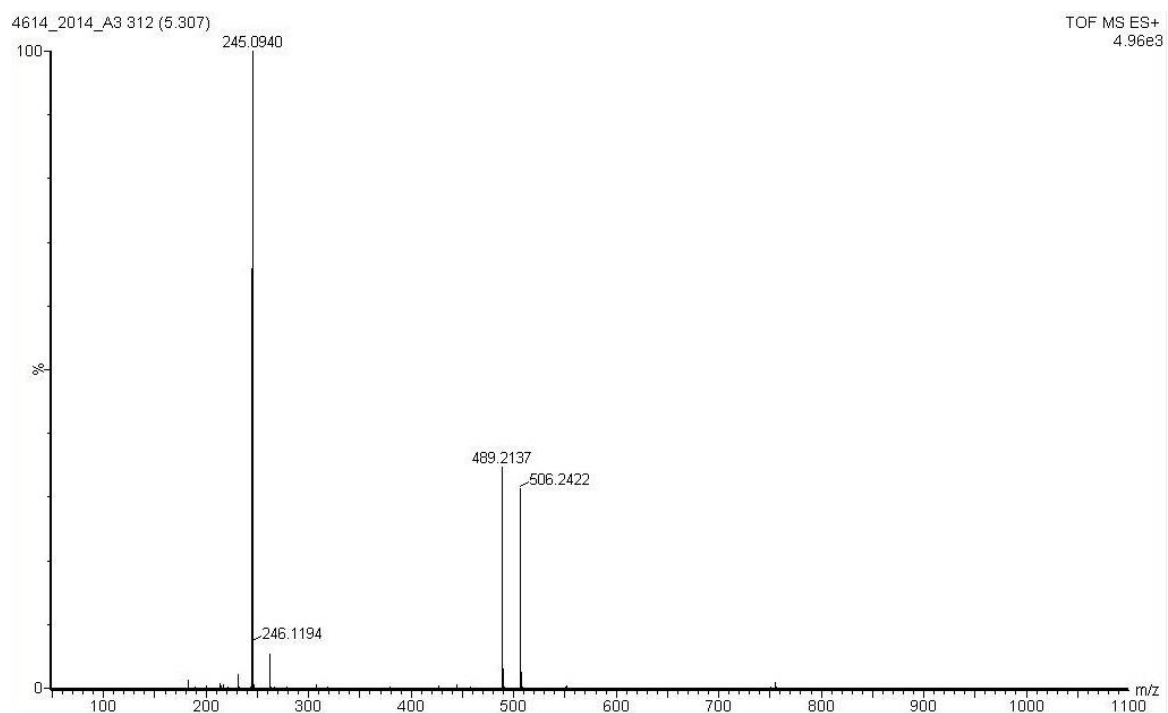

Figure S25: The HRMS spectra of the compound **22**

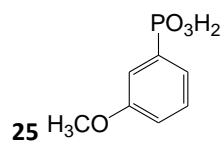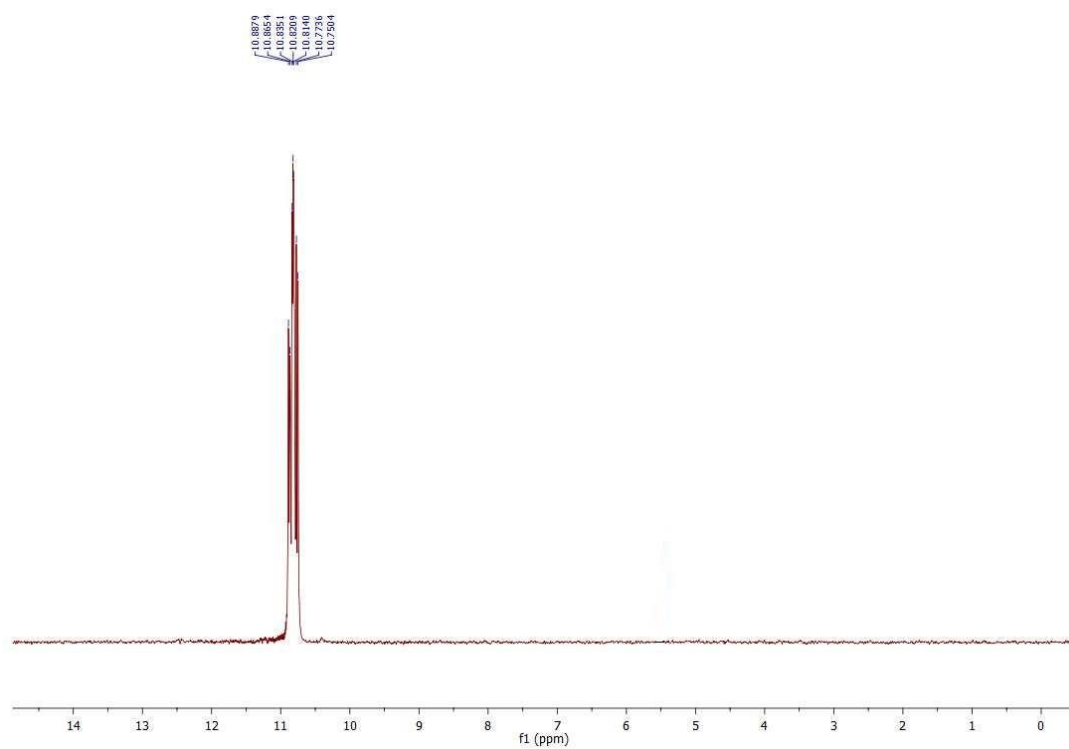

Figure S26: The  $^{31}\text{P}$  NMR spectra of the compound 25

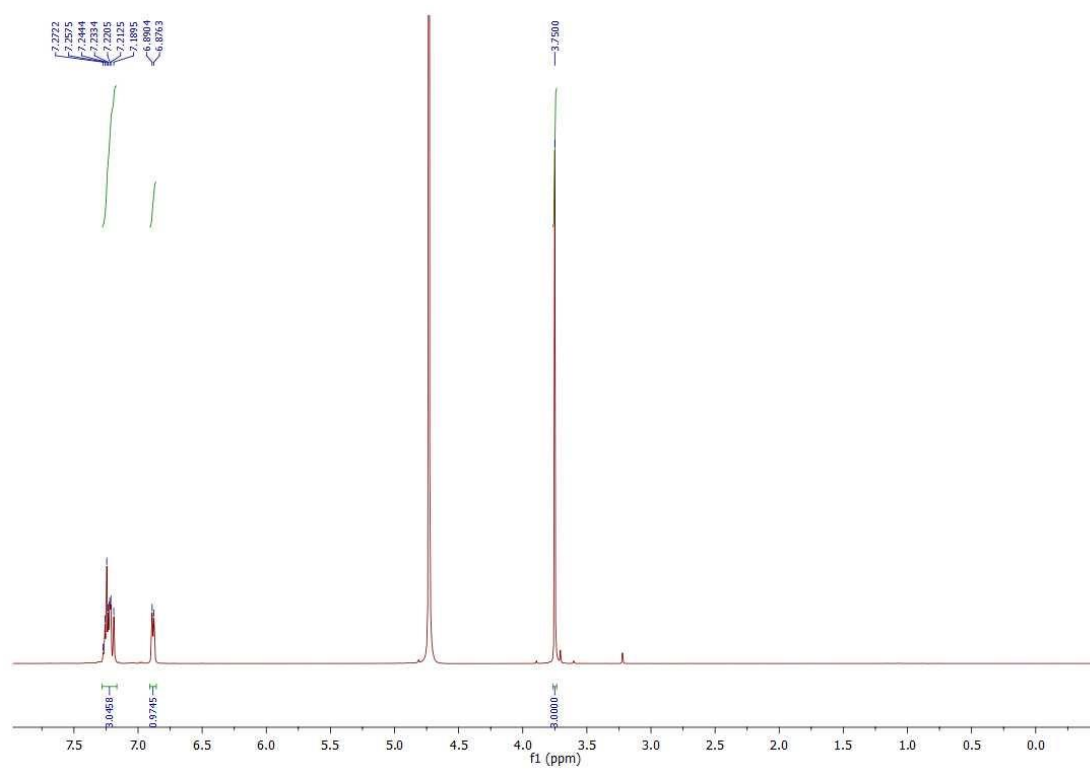

Figure S27: The  $^1\text{H}$  NMR spectra of the compound 25



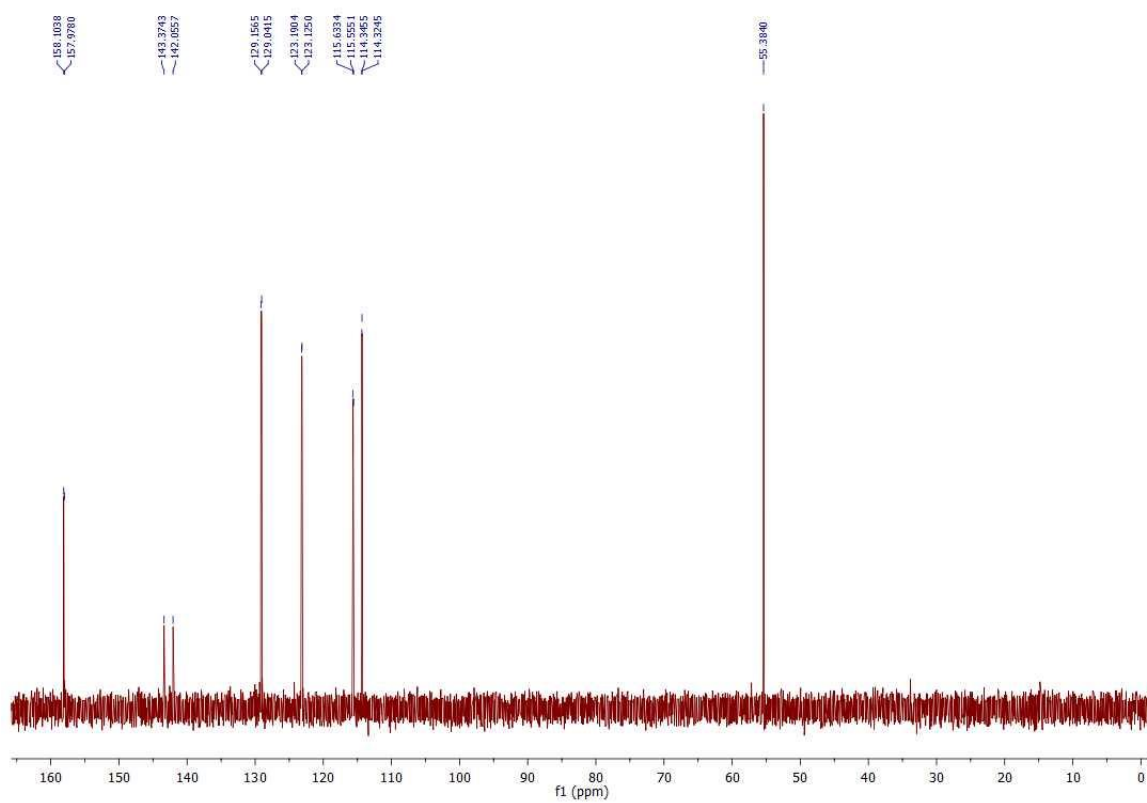

Figure S28: The  $^{13}\text{C}$  NMR spectra of the compound **25**

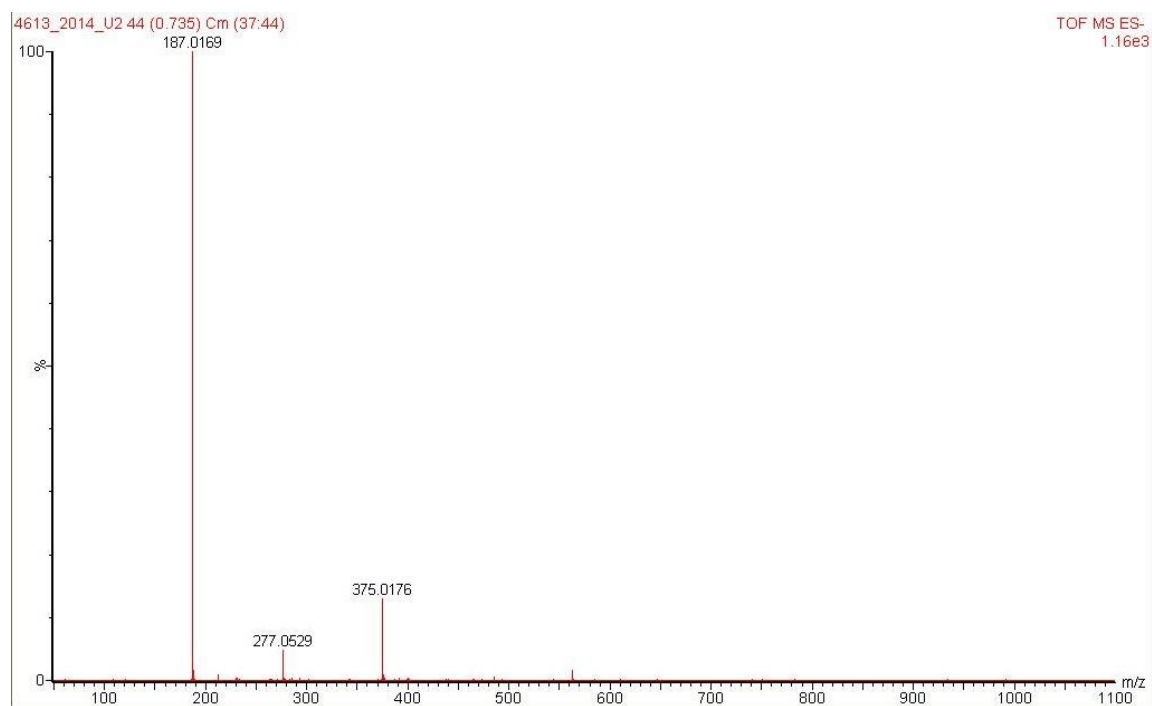

Figure S29: The HRMS spectra of the compound **25**

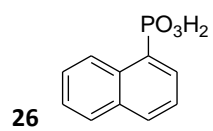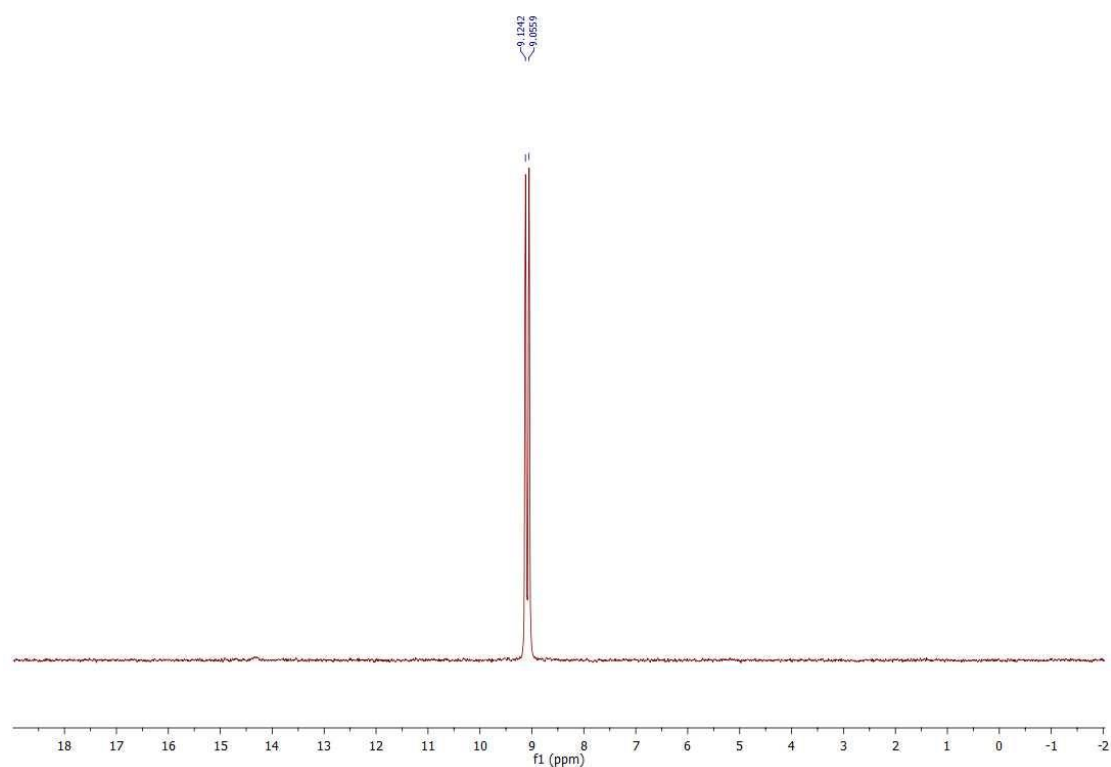

Figure S30: The  $^{31}\text{P}$  NMR spectra of the compound 26

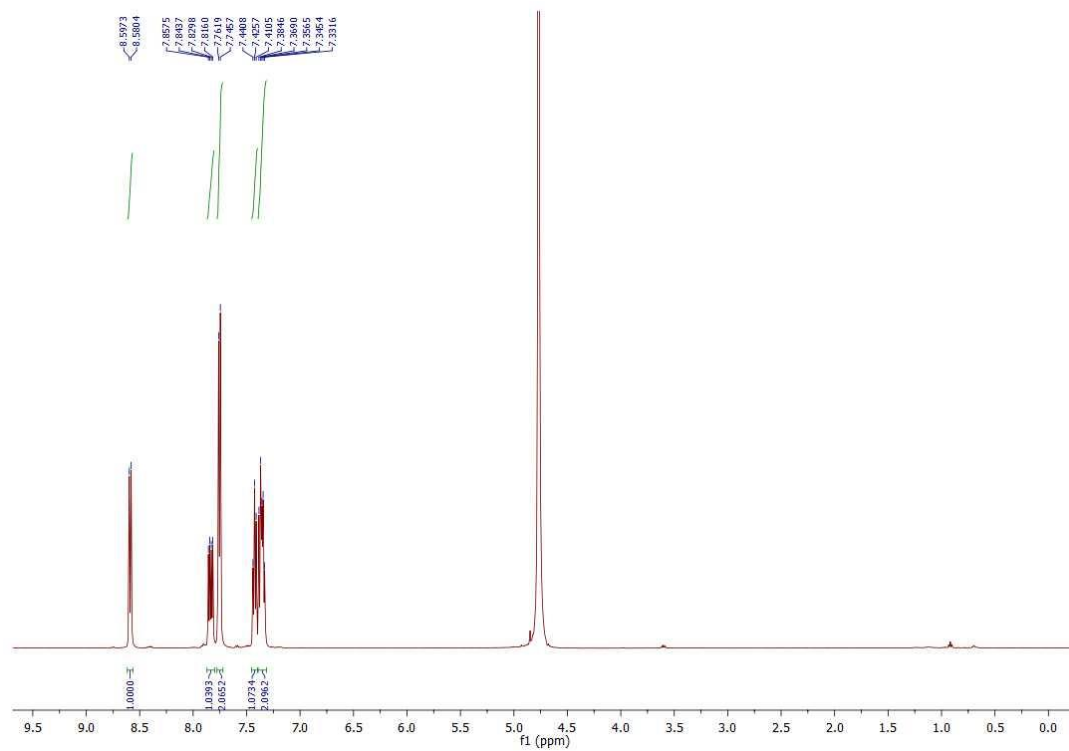

Figure S31: The  $^1\text{H}$  NMR spectra of the compound 26

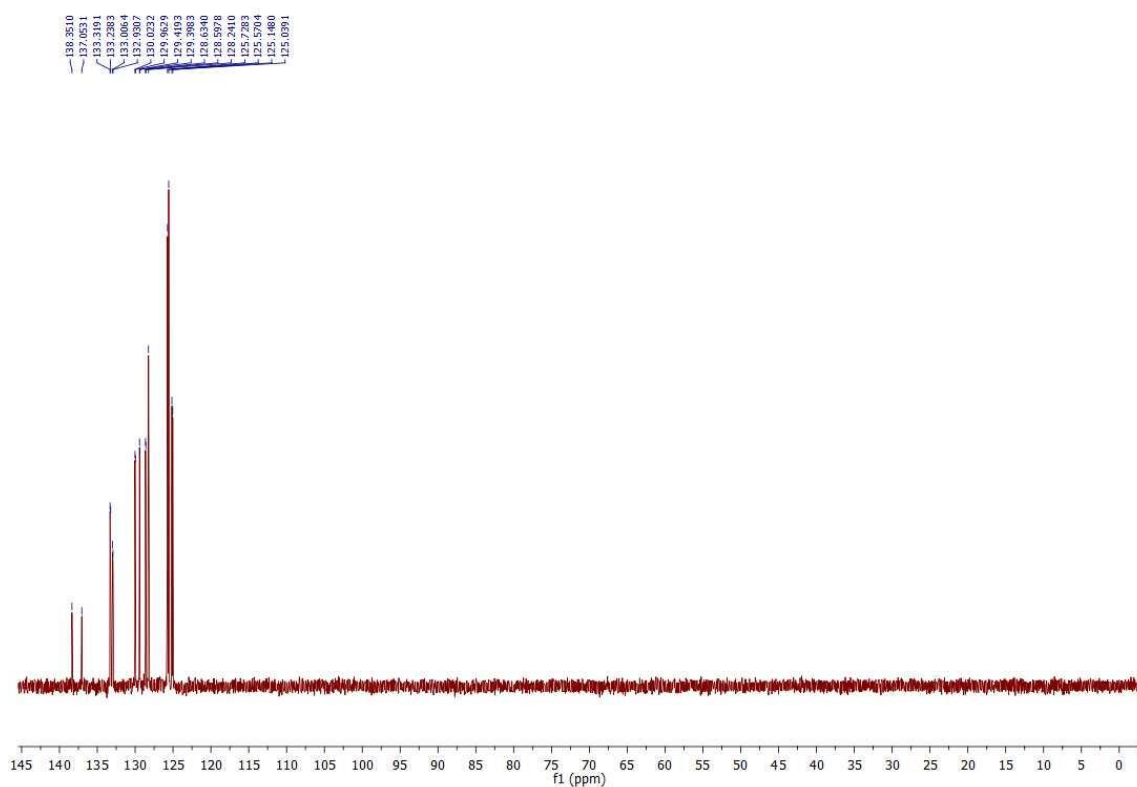

Figure S32: The  $^{13}\text{C}$  NMR spectra of the compound **26**

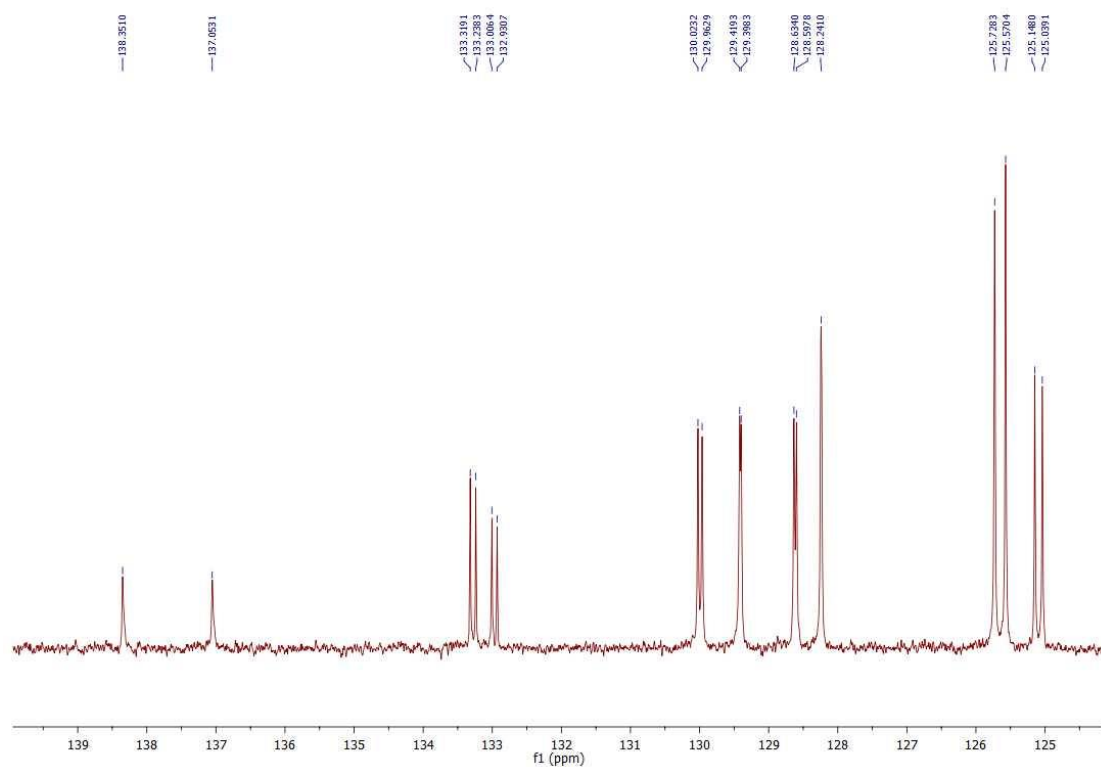

Figure S33: The  $^{13}\text{C}$  NMR spectra of the compound **26**

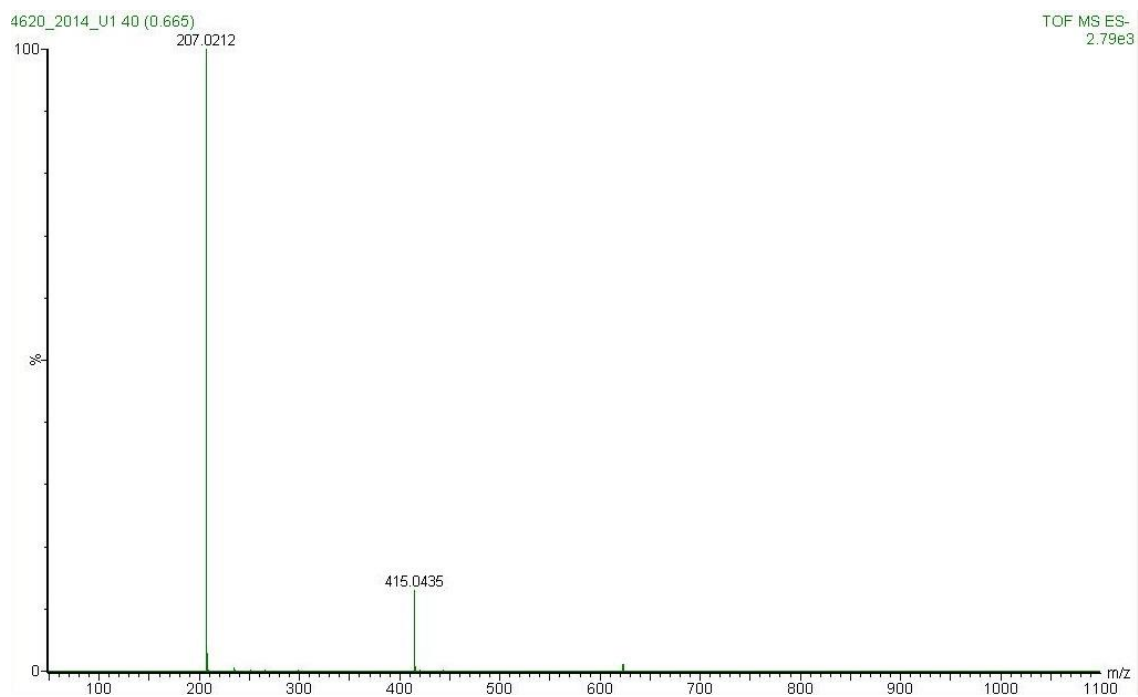

Figure S34: The HRMS spectra of the compound **26**

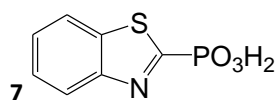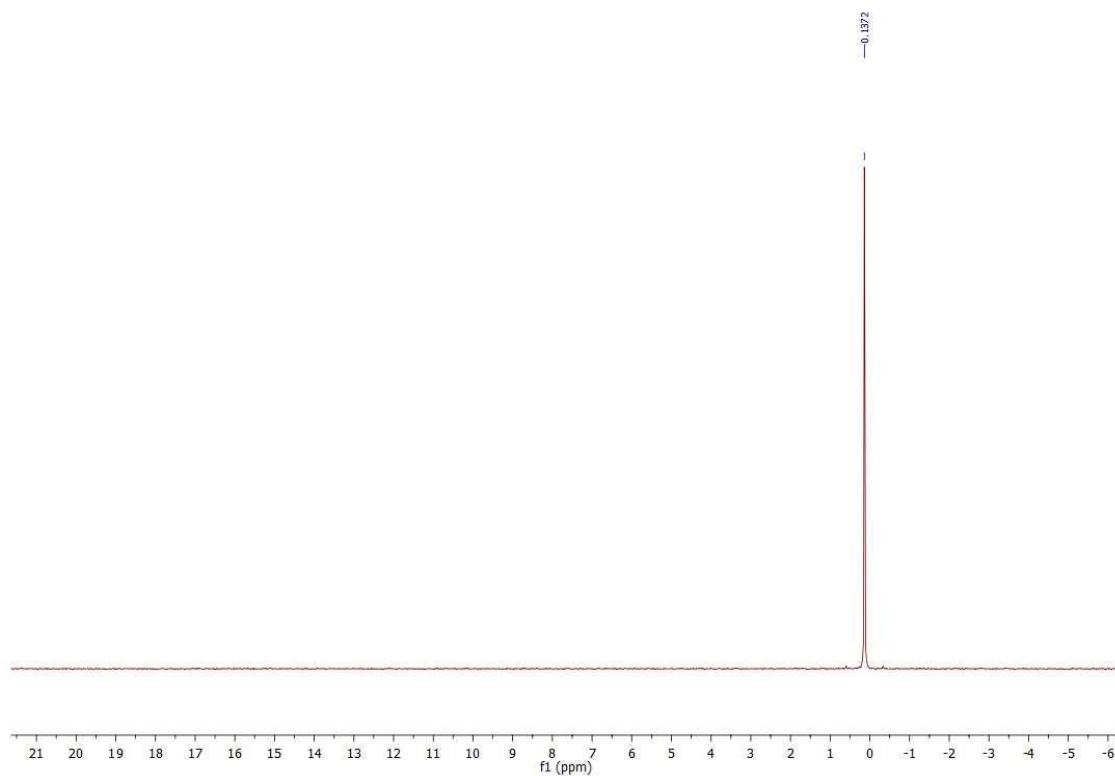

Figure S35: The  $^{31}\text{P}$  NMR spectra of the compound **7**

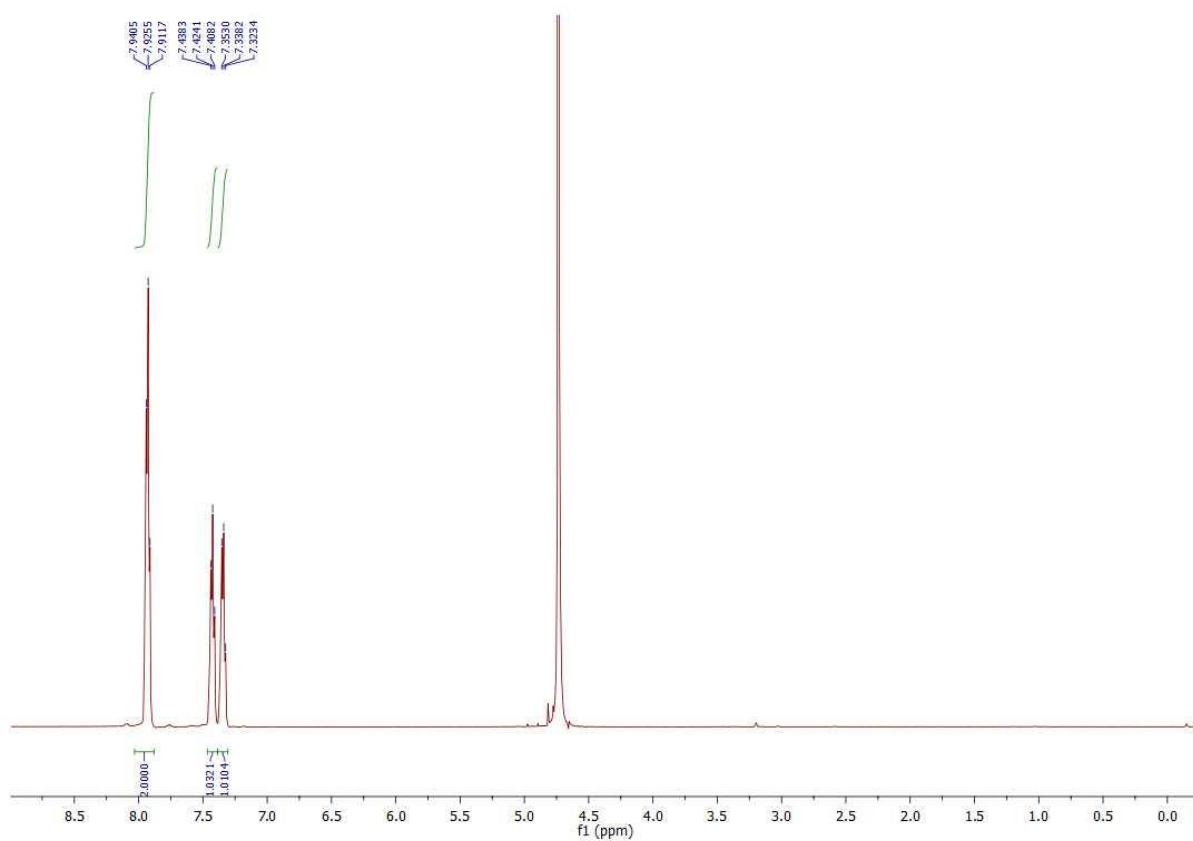

Figure S36: The  $^1\text{H}$  NMR spectra of the compound **7**

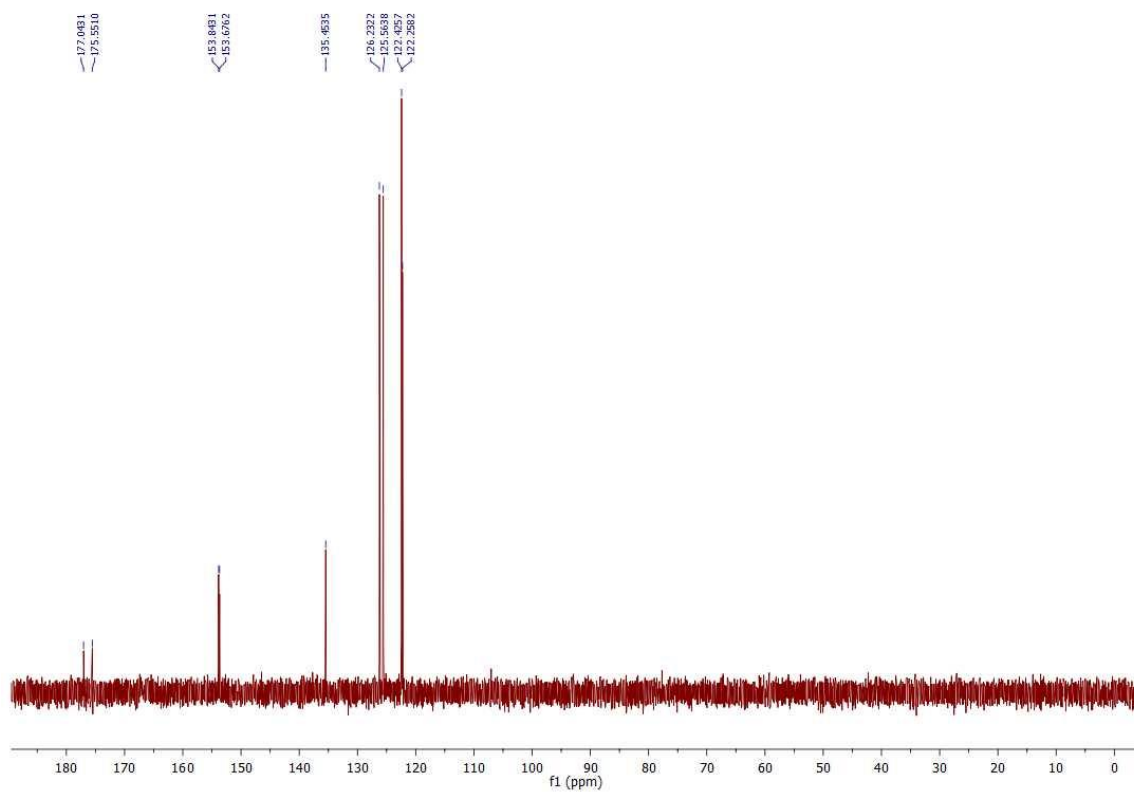

Figure S37: The  $^{13}\text{C}$  NMR spectra of the compound **7**

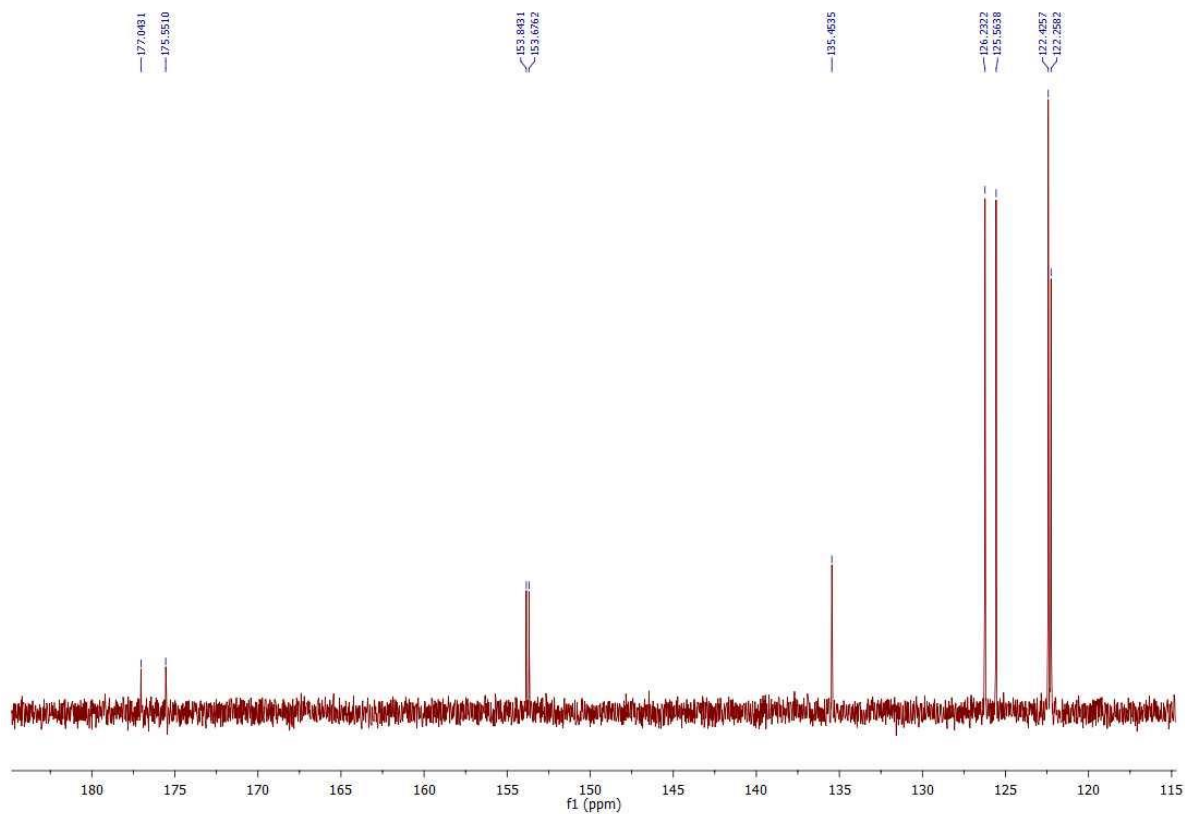

Figure S38: The  $^{13}\text{C}$  NMR spectra of the compound **7**

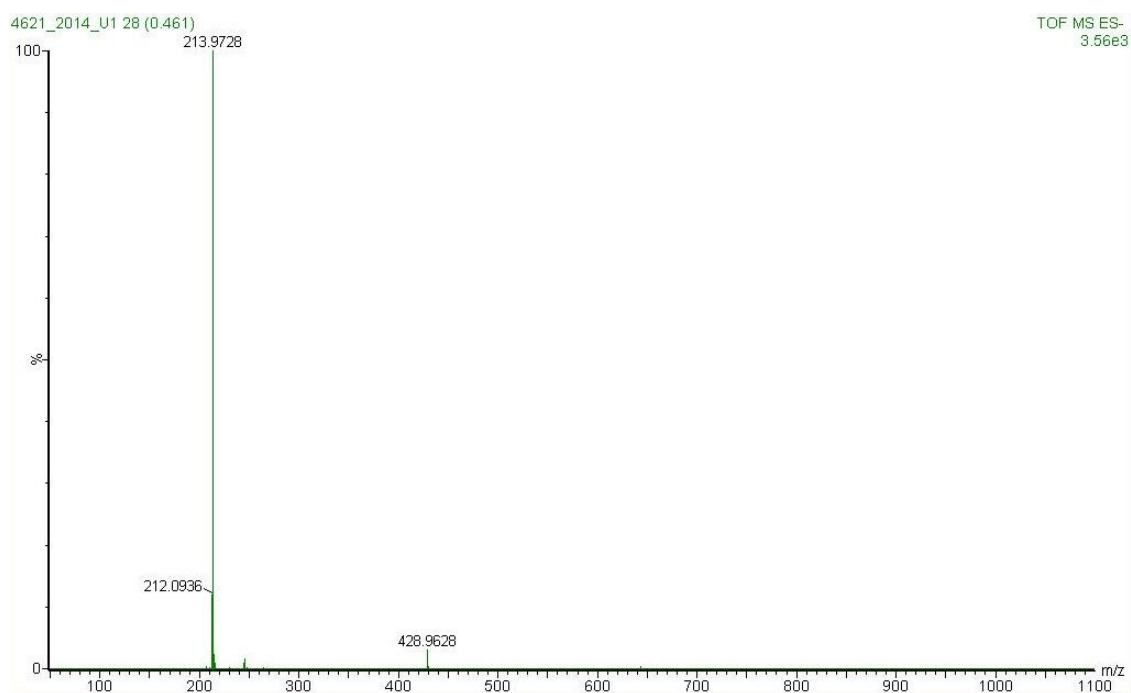

Figure S39: The HRMS spectra of the compound **7**

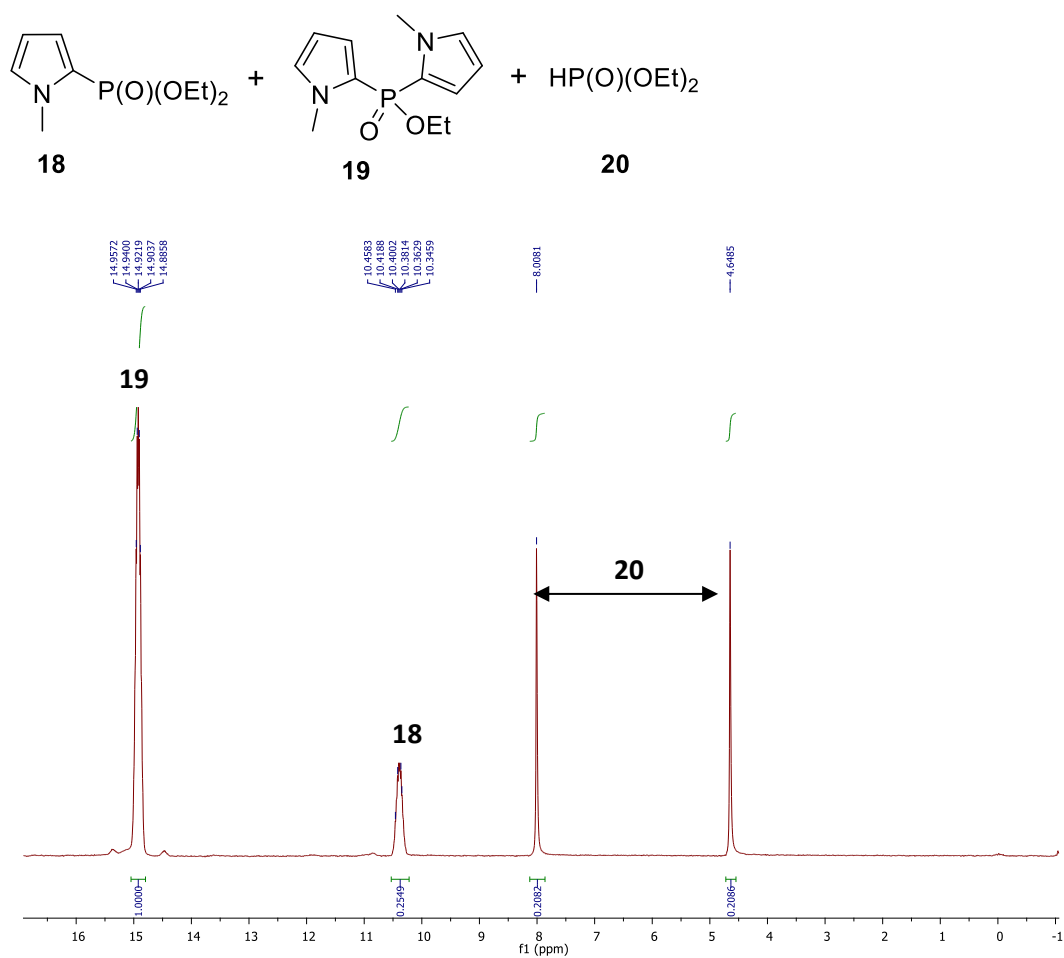

Figure S40: The  $^{31}\text{P}$  NMR spectra of the compounds **18**, **19** and **20**

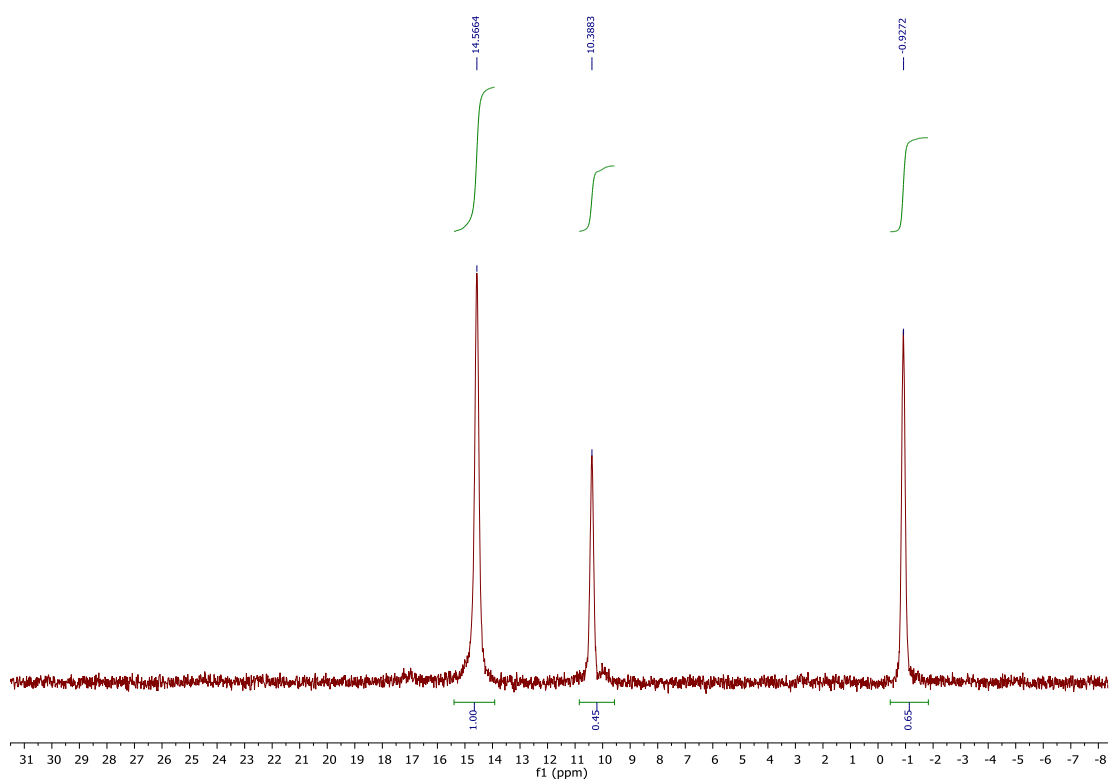

Figure S41: The  $^{31}\text{P}\{^1\text{H}\}$  NMR spectra of the compounds **18**, **19** and **20**

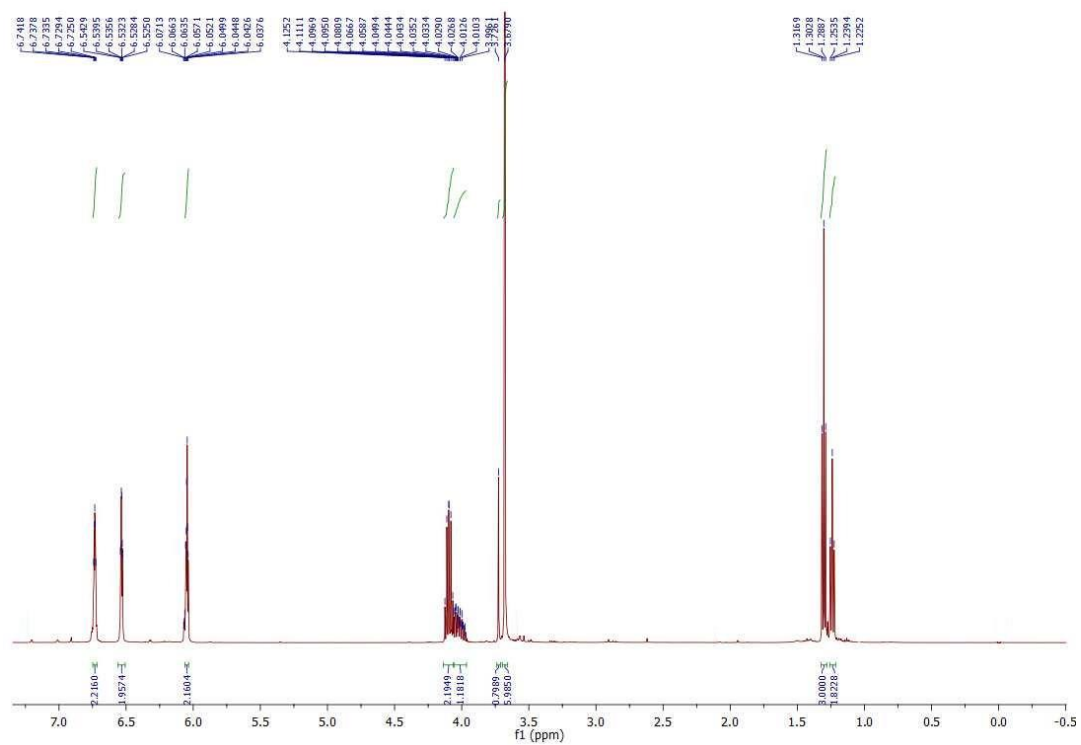

Figure S42: The  $^1\text{H}$  NMR spectra of the compounds **18**, **19** and **20**



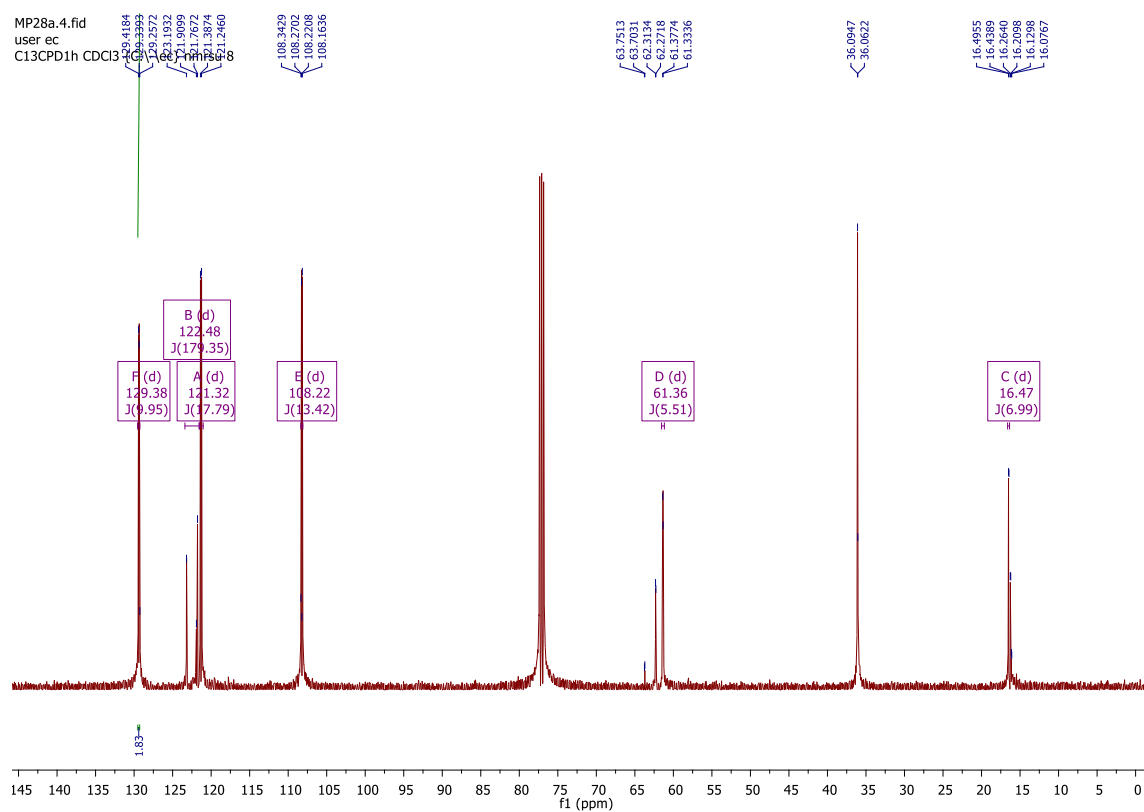

Figure S43: The  $^1\text{H}$  NMR spectra of the compounds **18**, **19** and **20**

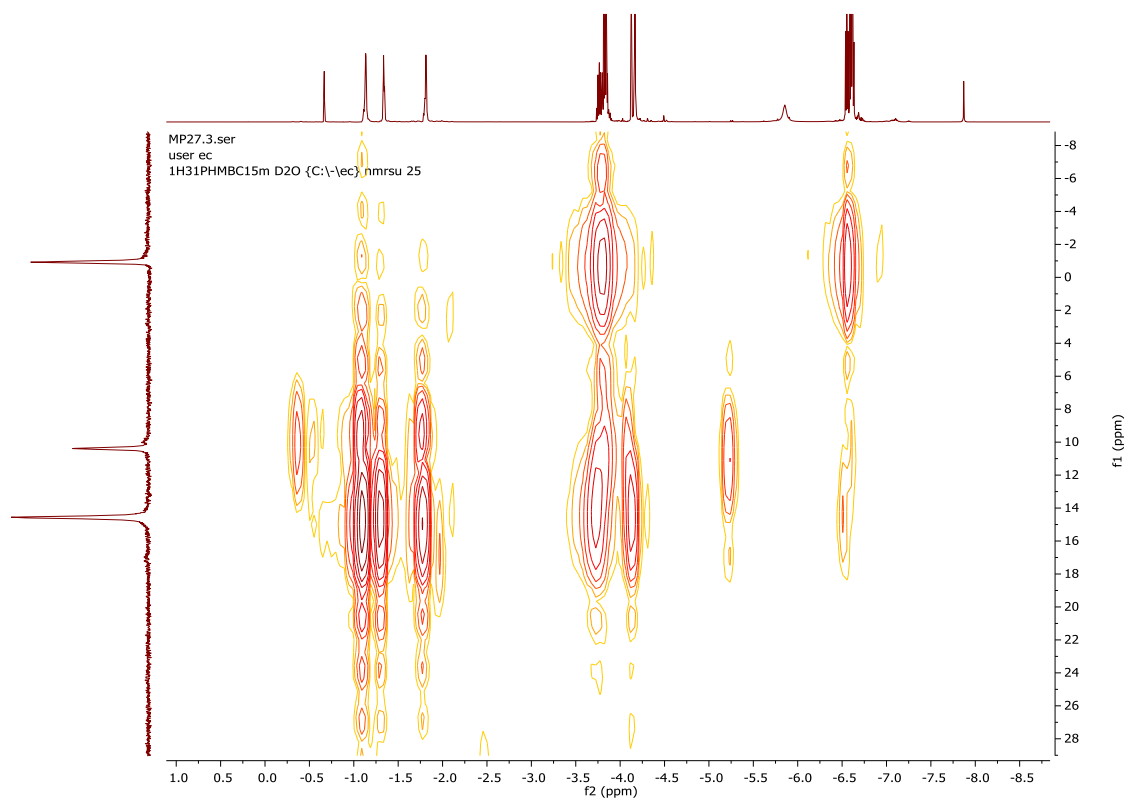

Figure S44: The  $^1\text{H}$  -  $^{31}\text{P}$  NMR spectra of the compounds **18**, **19** and **20**

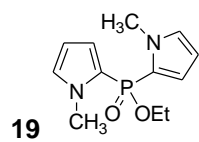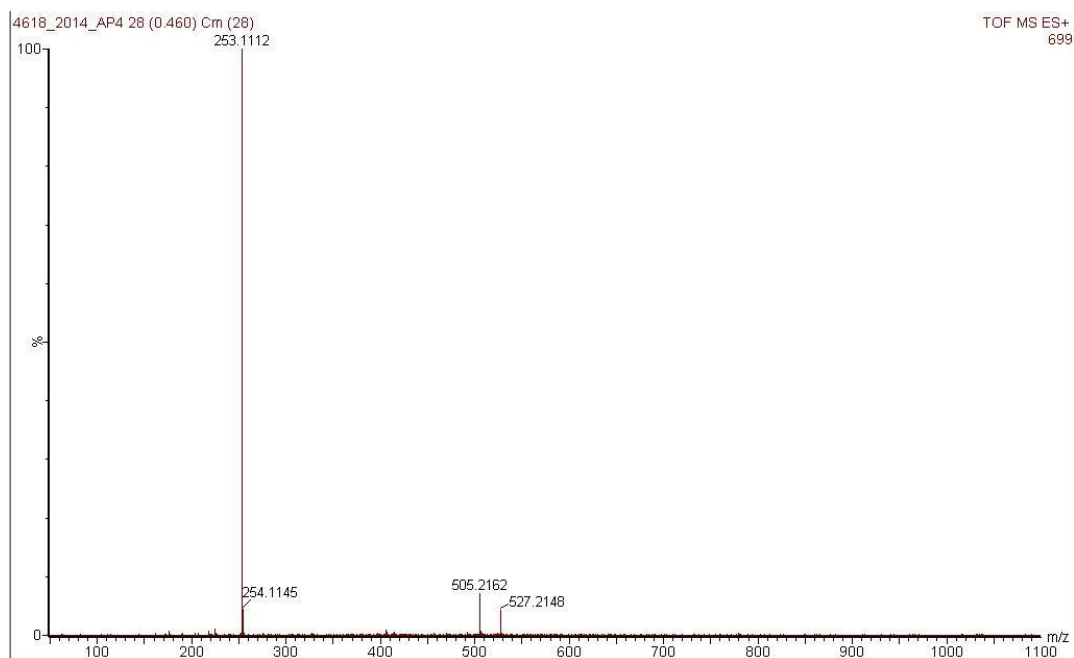

Figure S45: The HRMS spectra of the compound **19**

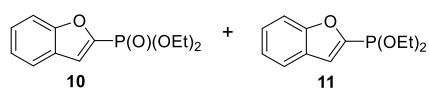

22.12.15 NW1 fr3

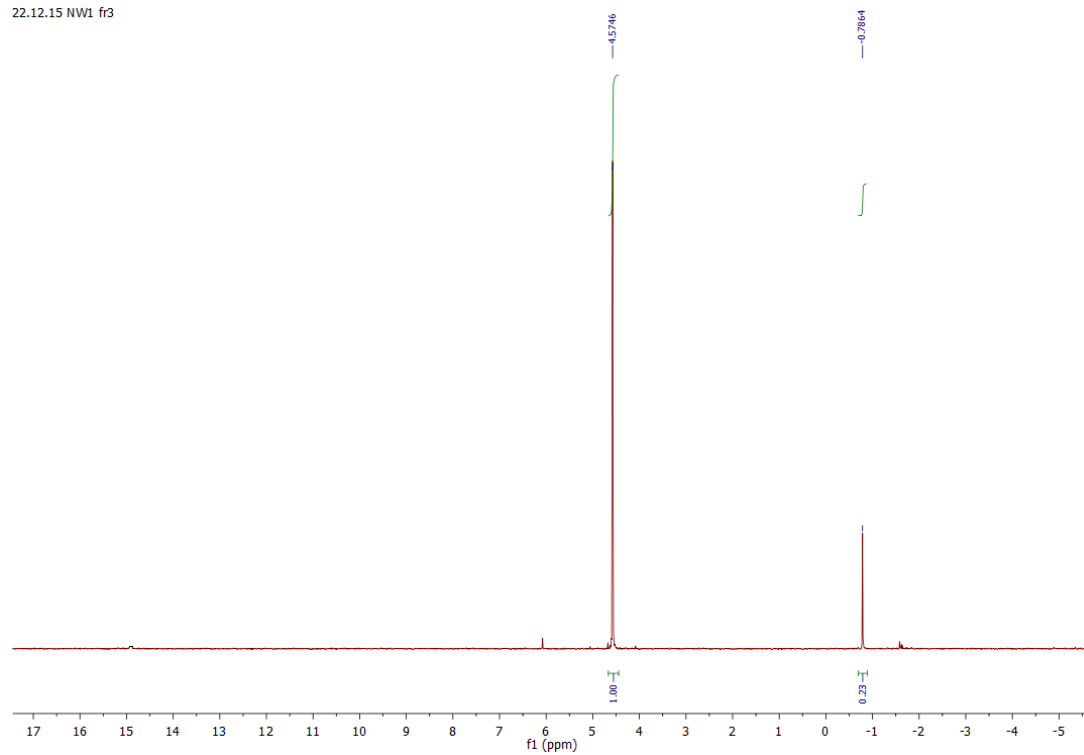

Figure S46: The  $^{31}\text{P}$  NMR spectra of the compounds **10** and **11**

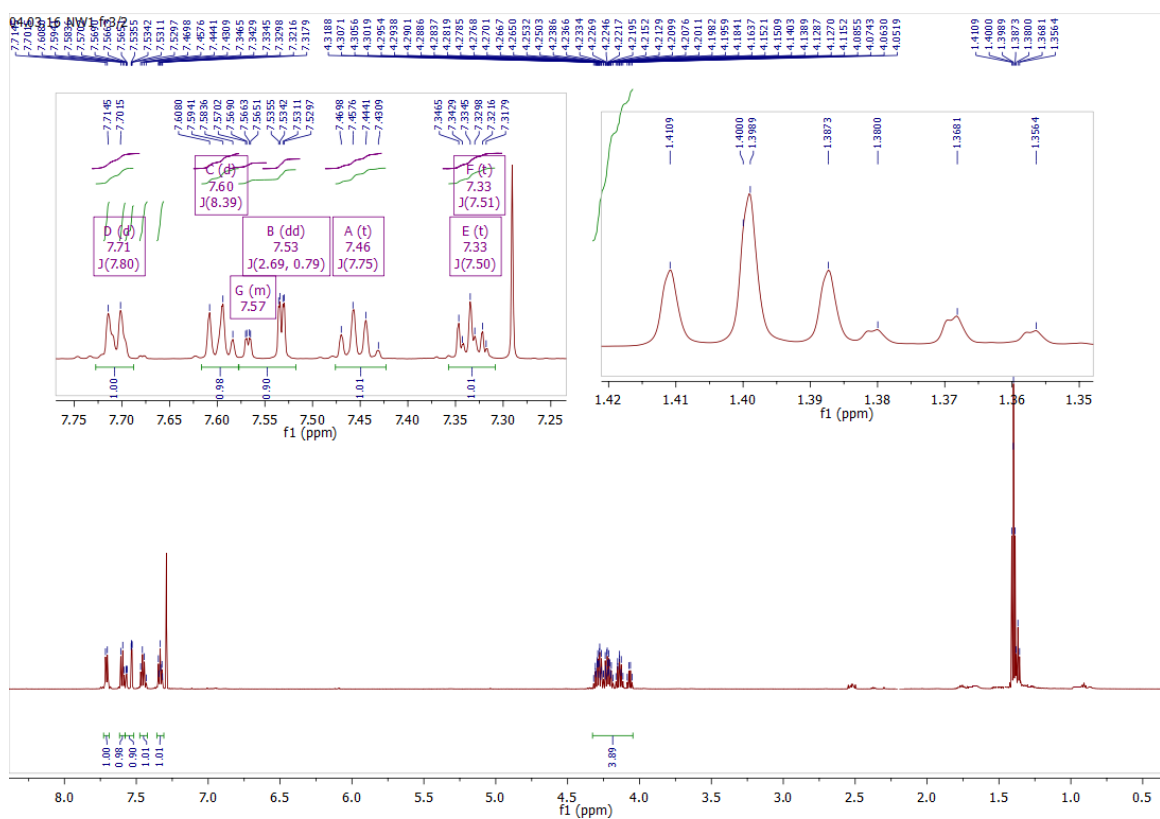

Figure S47: The  $^1\text{H}$  NMR spectra of the compounds **10** and **11**

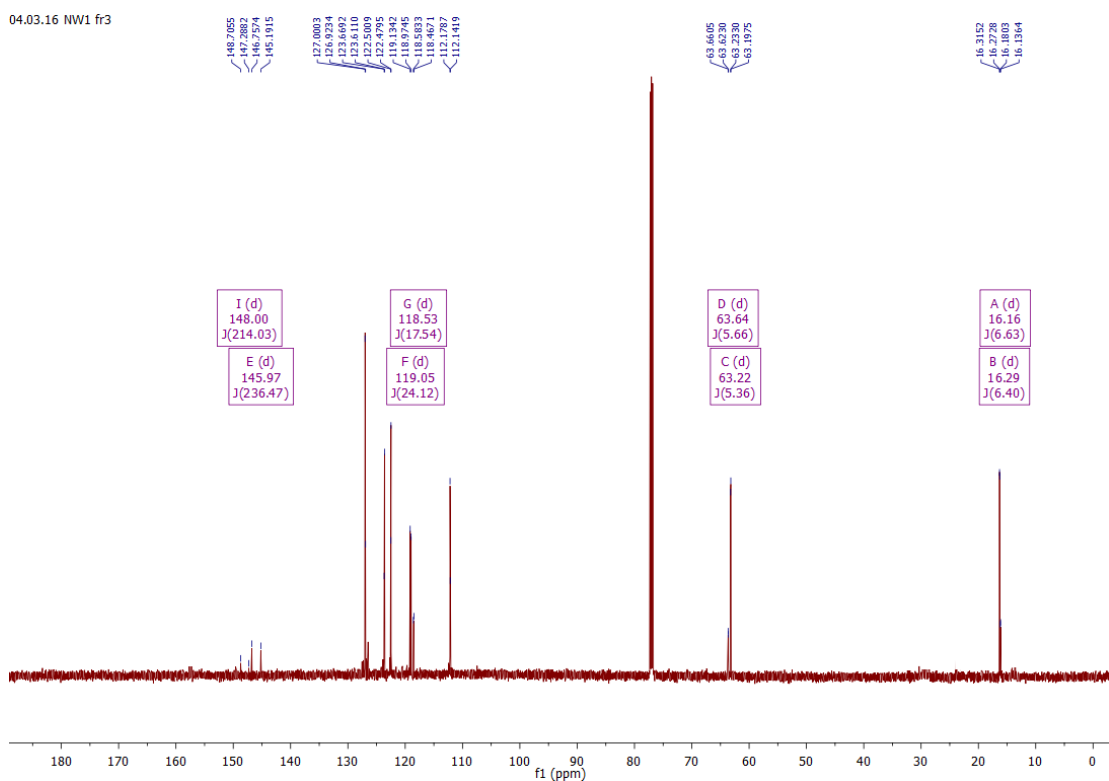

Figure S48: The  $^{13}\text{C}$  NMR spectra of the compounds **10** and **11**

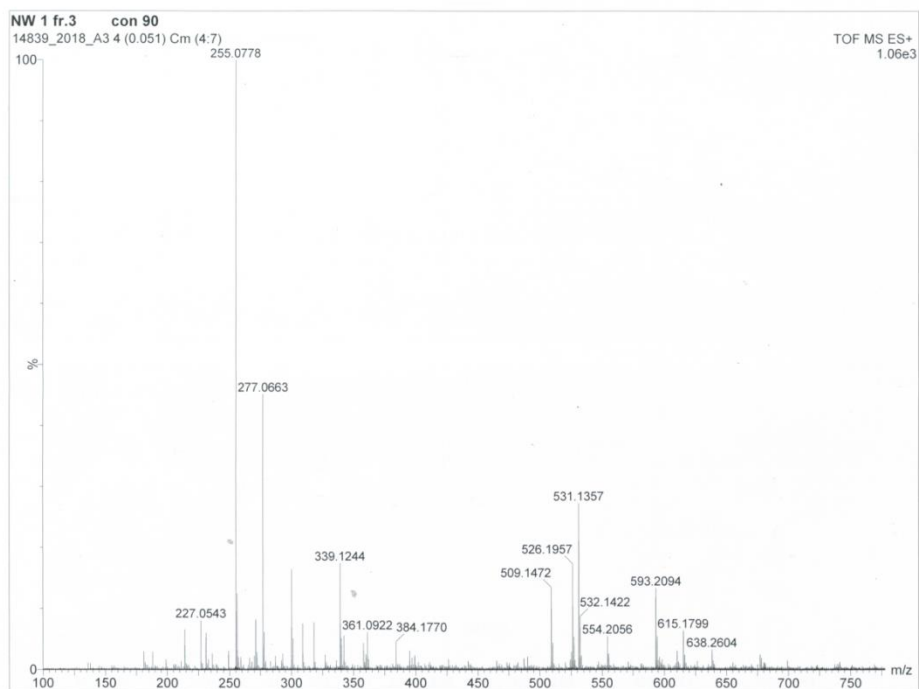

Figure S49: The HRMS spectra of the compounds **10** and **11**

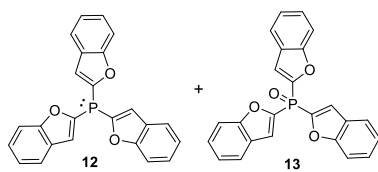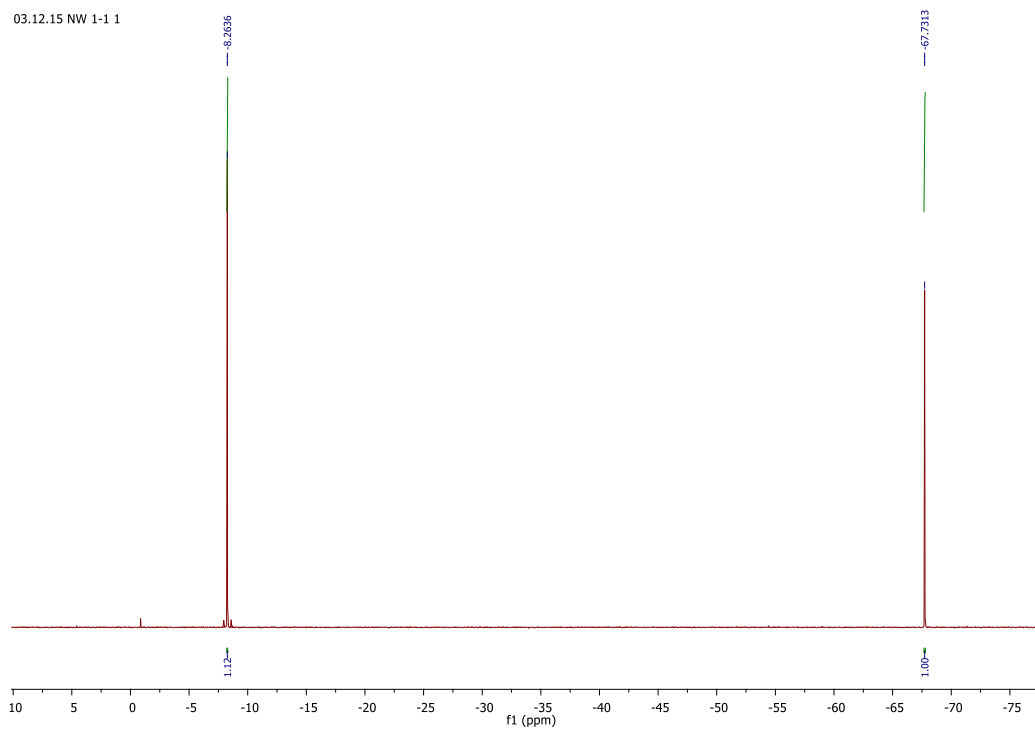

Figure S50: The  $^{31}\text{P}$  NMR spectra of the compounds **12** and **13**



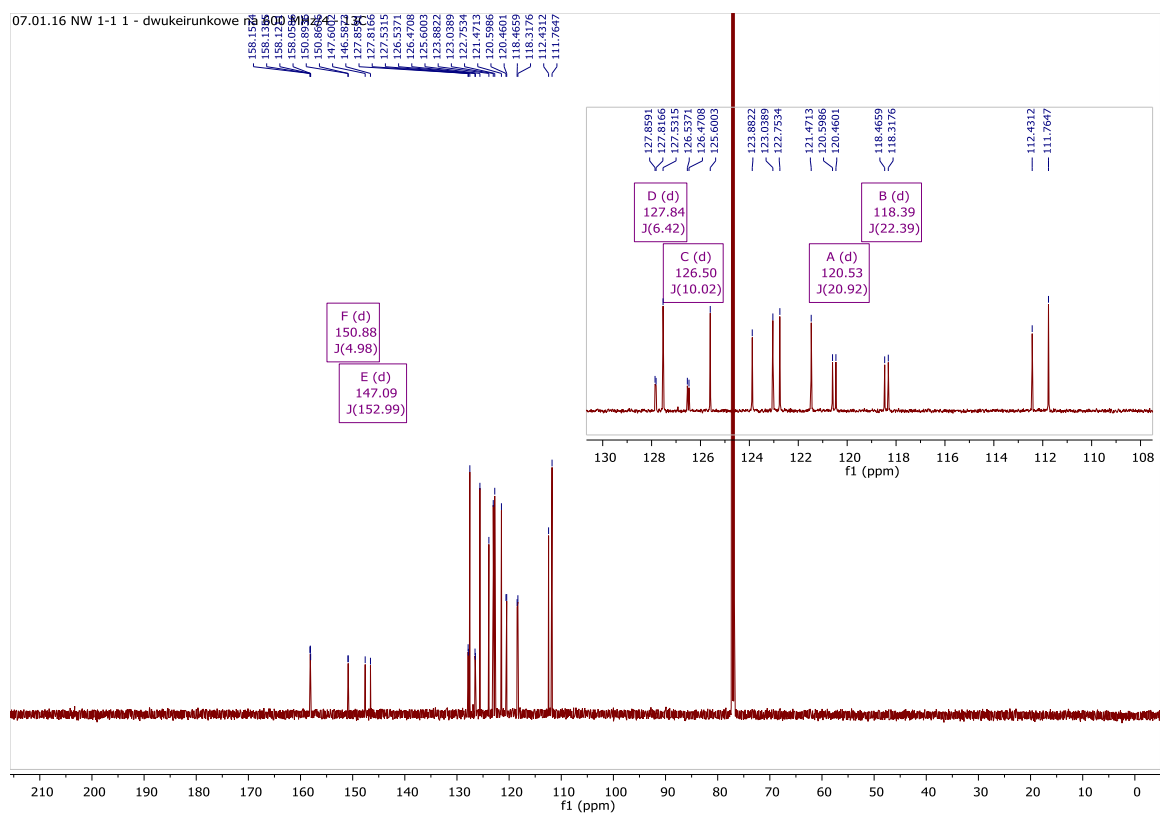

Figure S53: The  $^{13}\text{C}$  NMR spectra of the compounds **12** and **13**

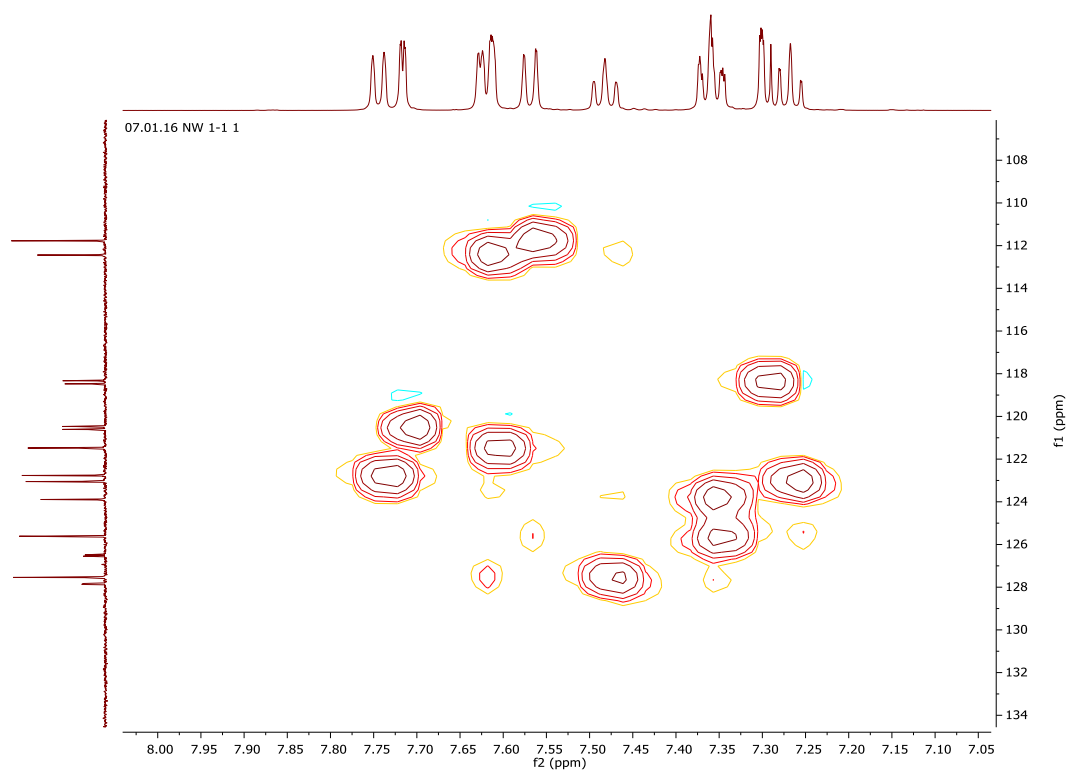

Figure S54: The  $^1\text{H}$  -  $^{13}\text{C}$  NMR spectra of the compounds **12** and **13**

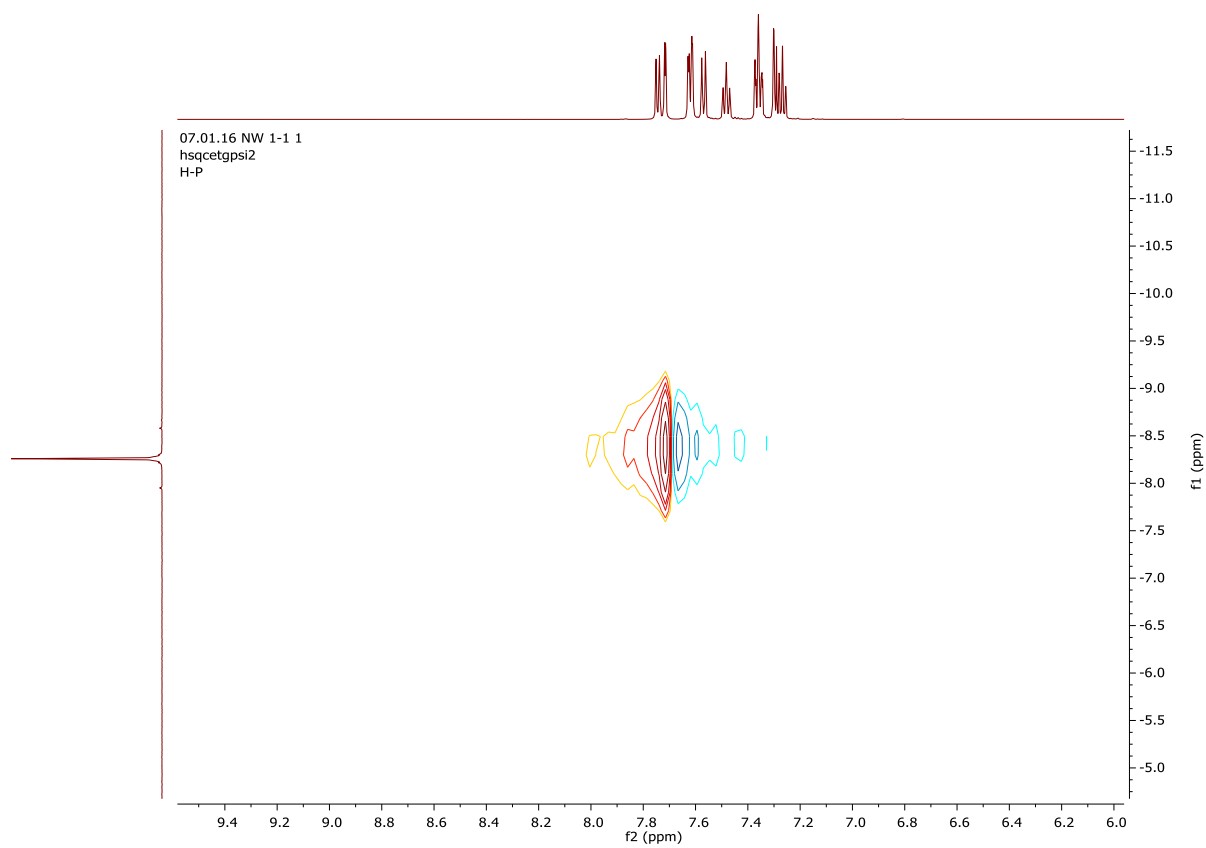

Figure S55: The  $^1\text{H}$  -  $^{31}\text{P}$  NMR spectra of the compounds **12** and **13**

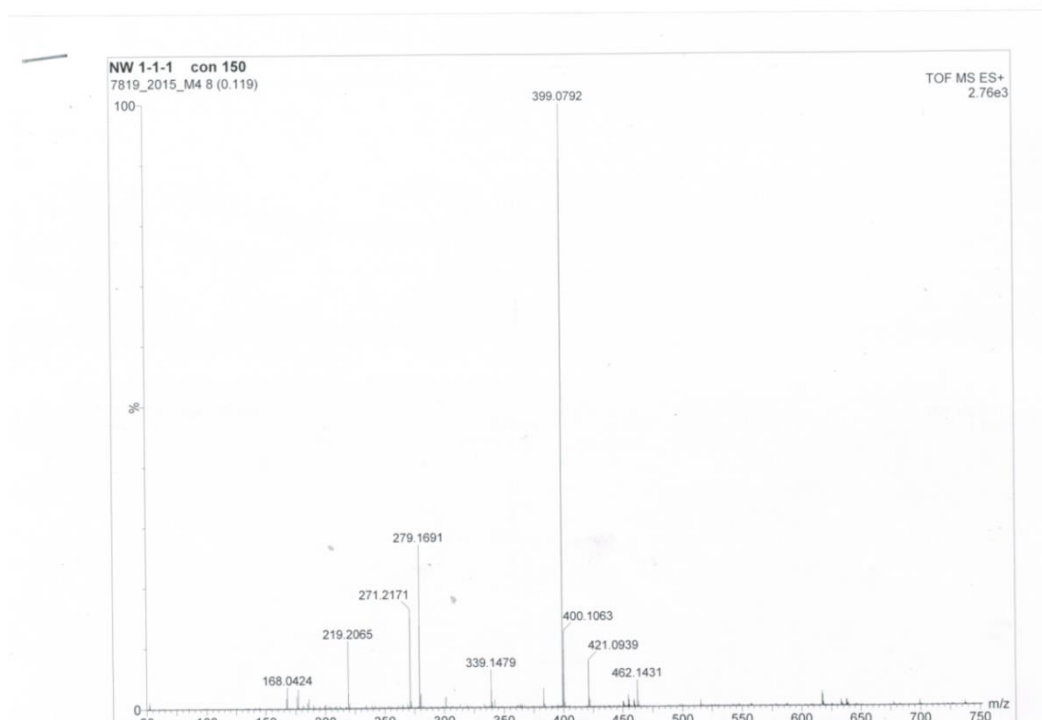

Figure S56: The HRMS NMR spectra of the compounds **12** and **13**

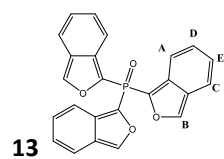

MP-EC-I  
single pulse decoupled gated NOE

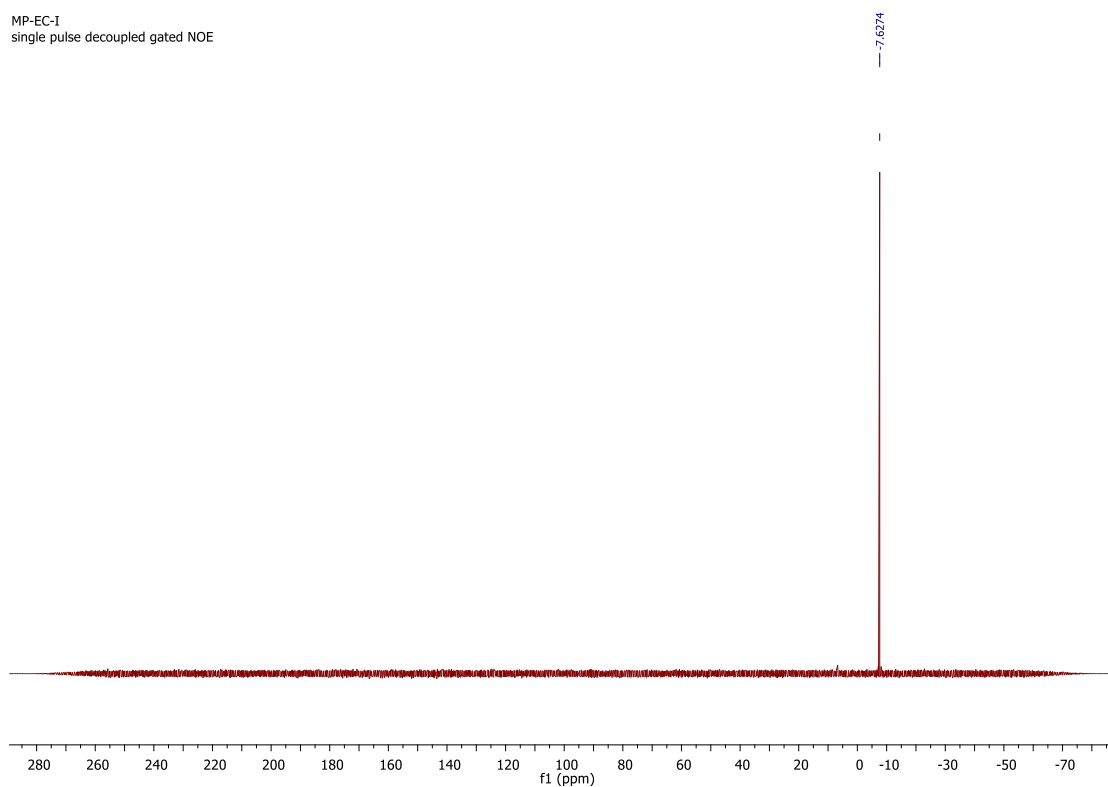

Figure S57: The  $^{31}\text{P}$  NMR spectra of the compound **13**



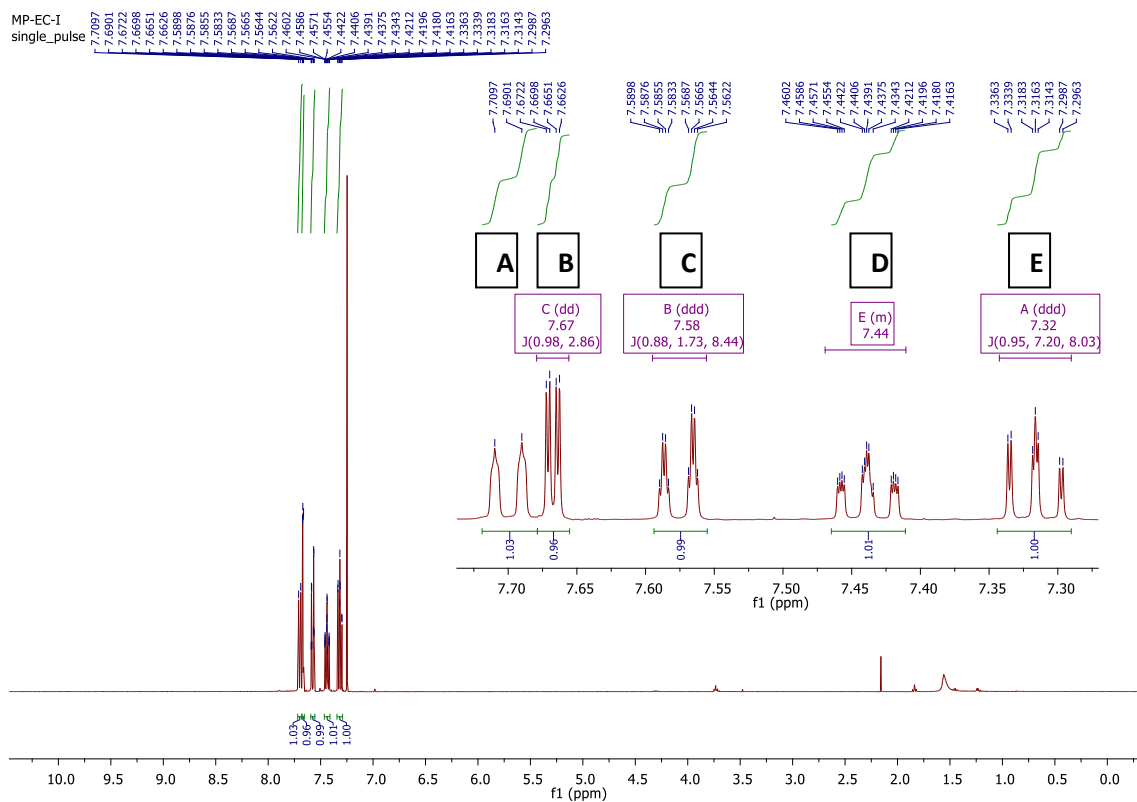

Figure S58: The  $^1\text{H}$  NMR spectra of the compound **13**

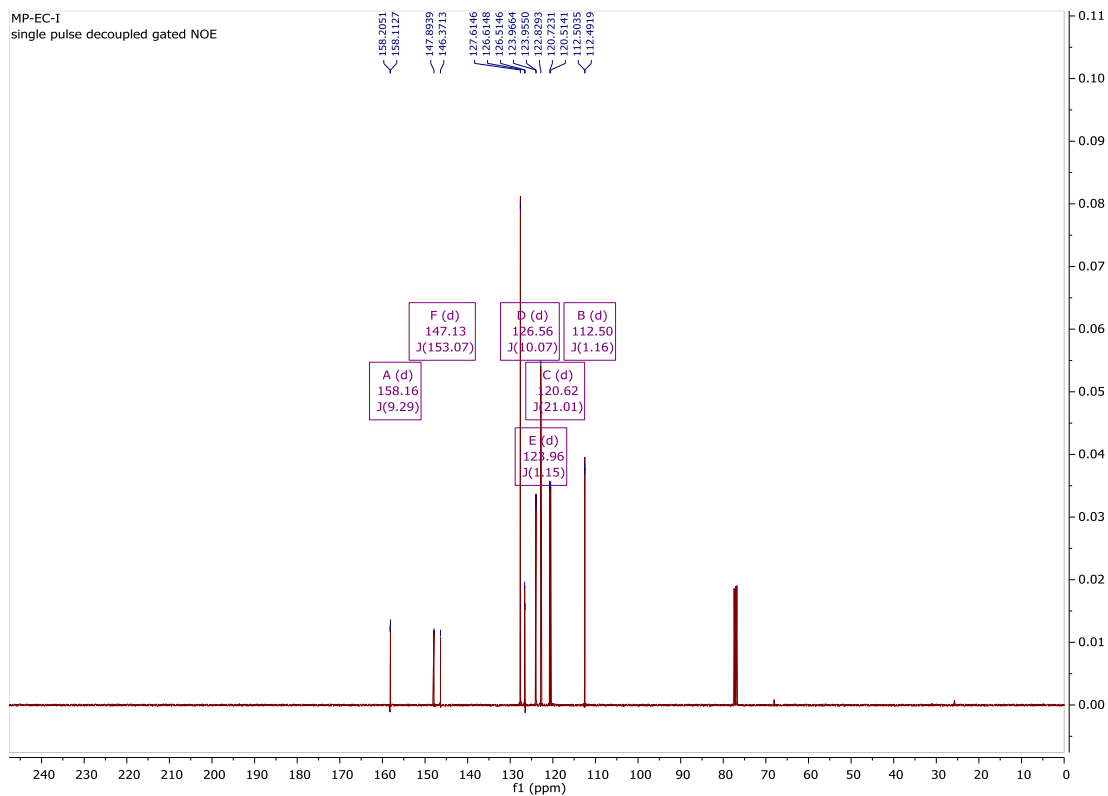

Figure S59: The  $^{13}\text{C}$  NMR spectra of the compound **13**

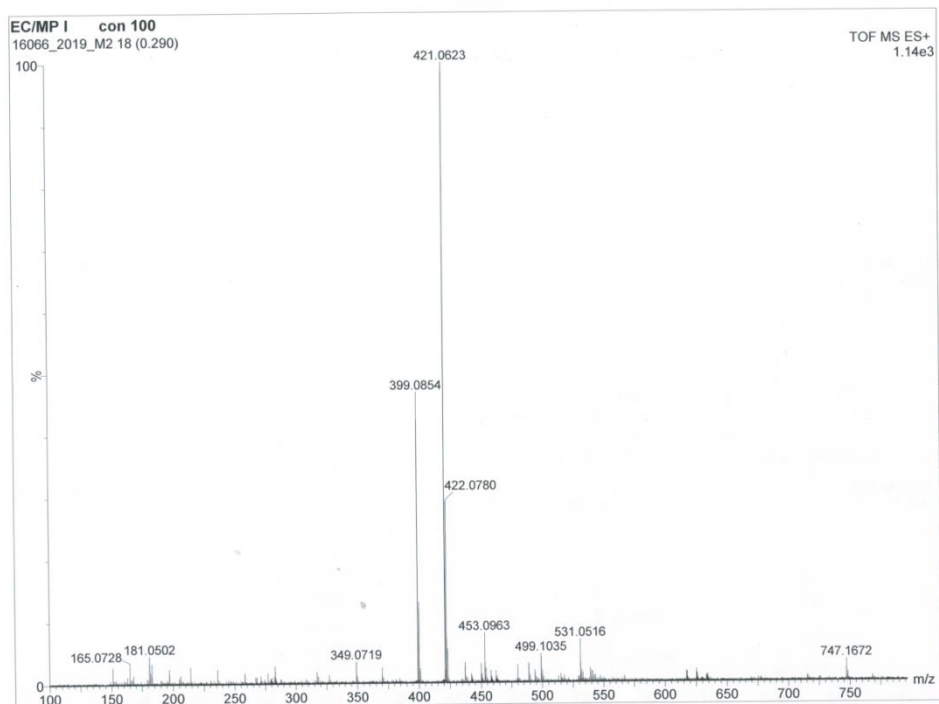

Figure S60: The HRMS spectra of the compound **13**

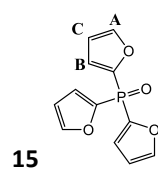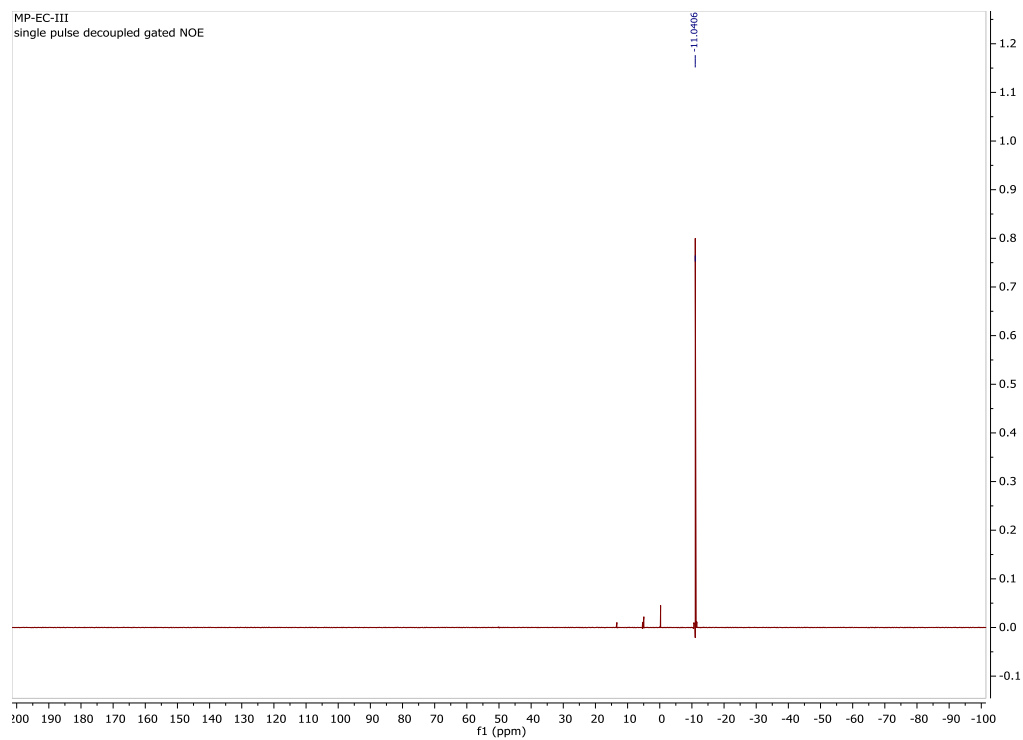

Figure S61: The  $^{31}\text{P}$  NMR spectra of the compound **13**

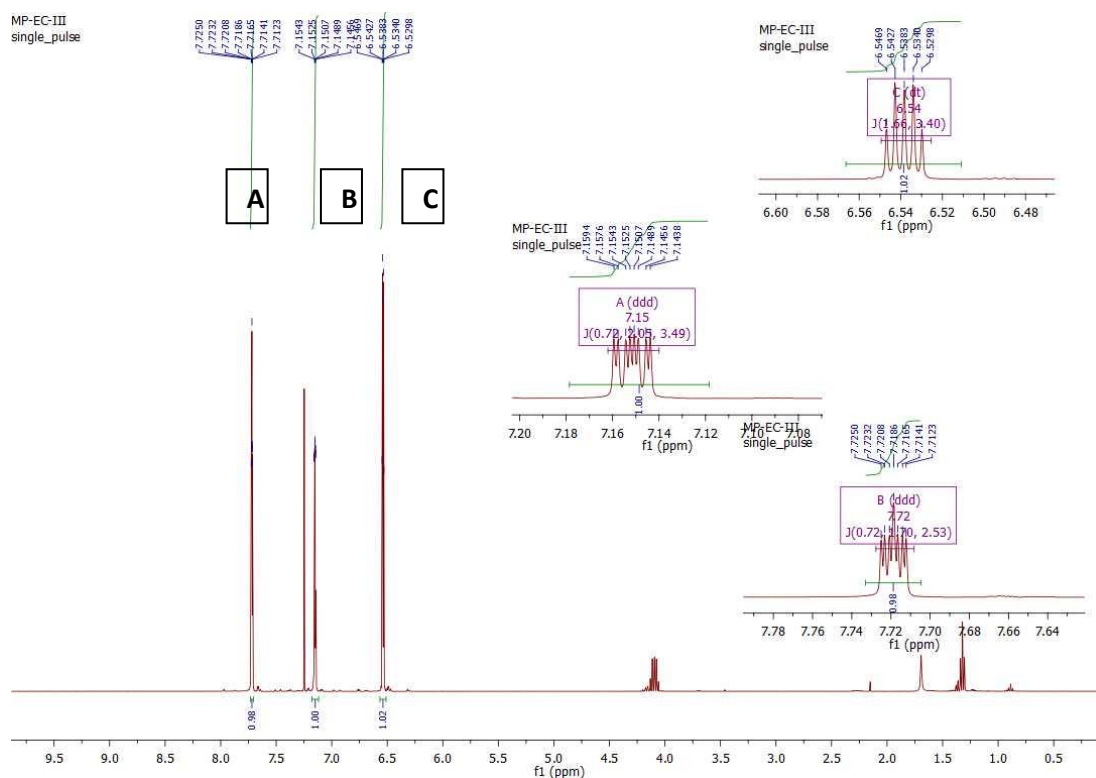

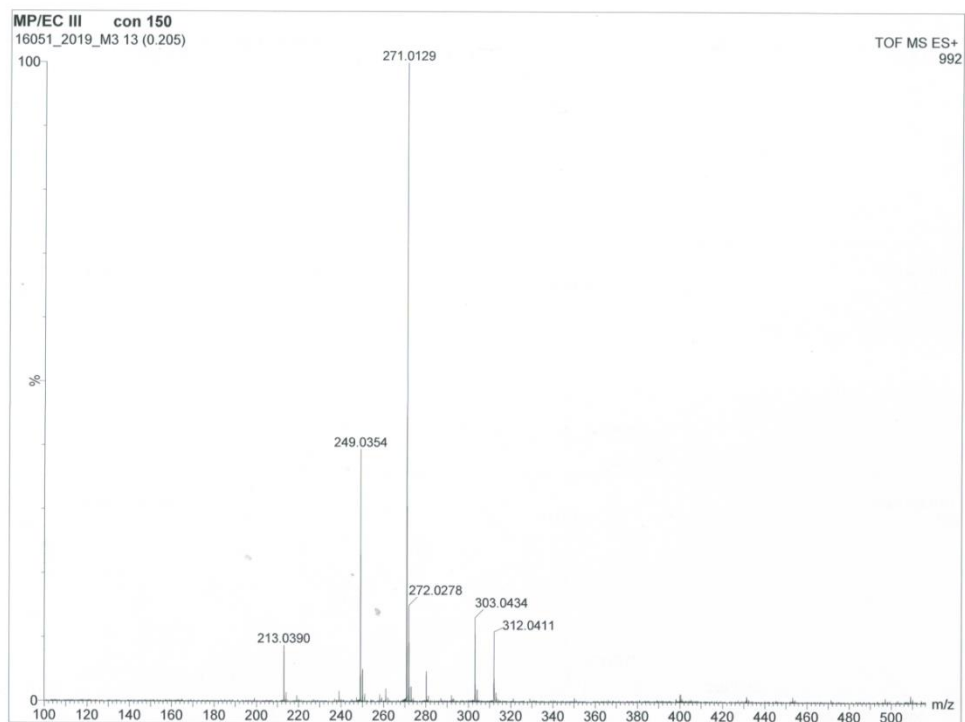

Figure S64: The HRMS spectra of the compound **13**

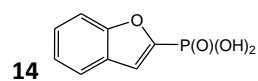

NW3fr2-II  
single pulse decoupled gated NOE

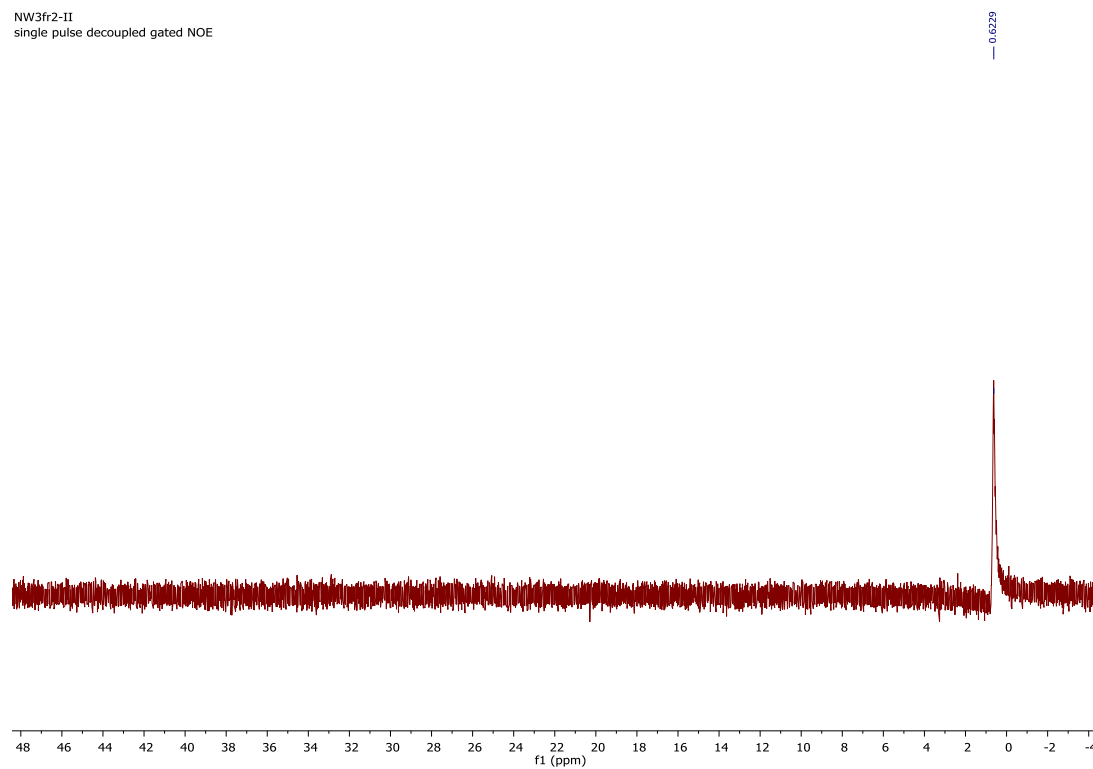

Figure S65: The  $^{31}\text{P}$  NMR spectra of the compound **14**

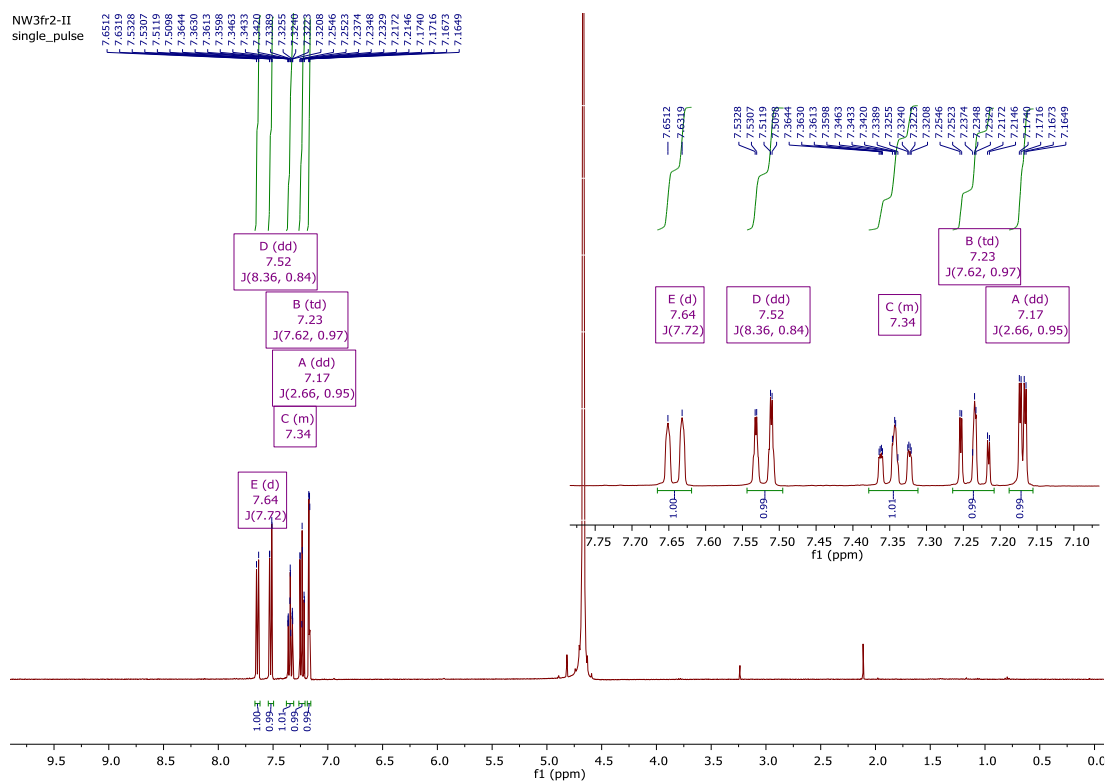

Figure S66: The  $^1\text{H}$  NMR spectra of the compound **14**

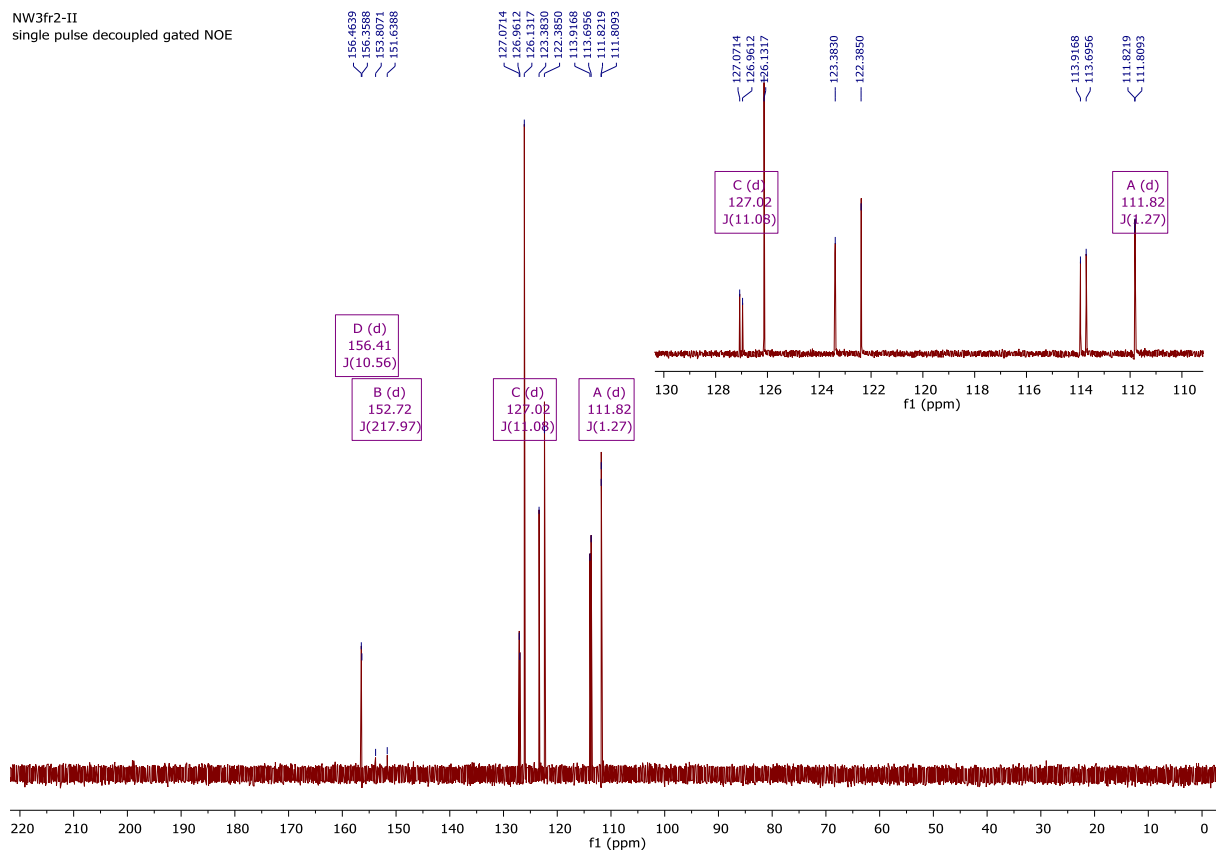

Figure S67: The  $^{13}\text{C}$  NMR spectra of the compound **14**

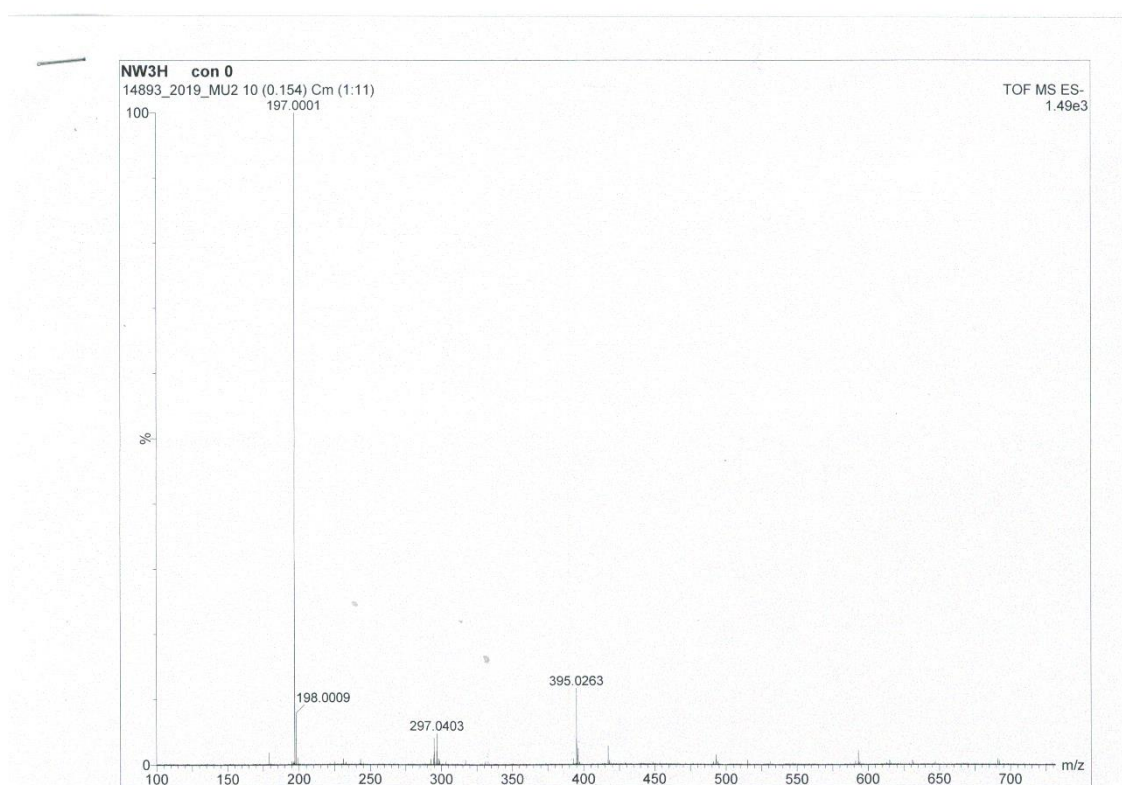

Figure S68: The HRMS spectra of the compound **14**

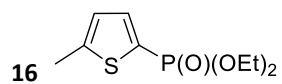

10.03.16 NW 2 fr. 1

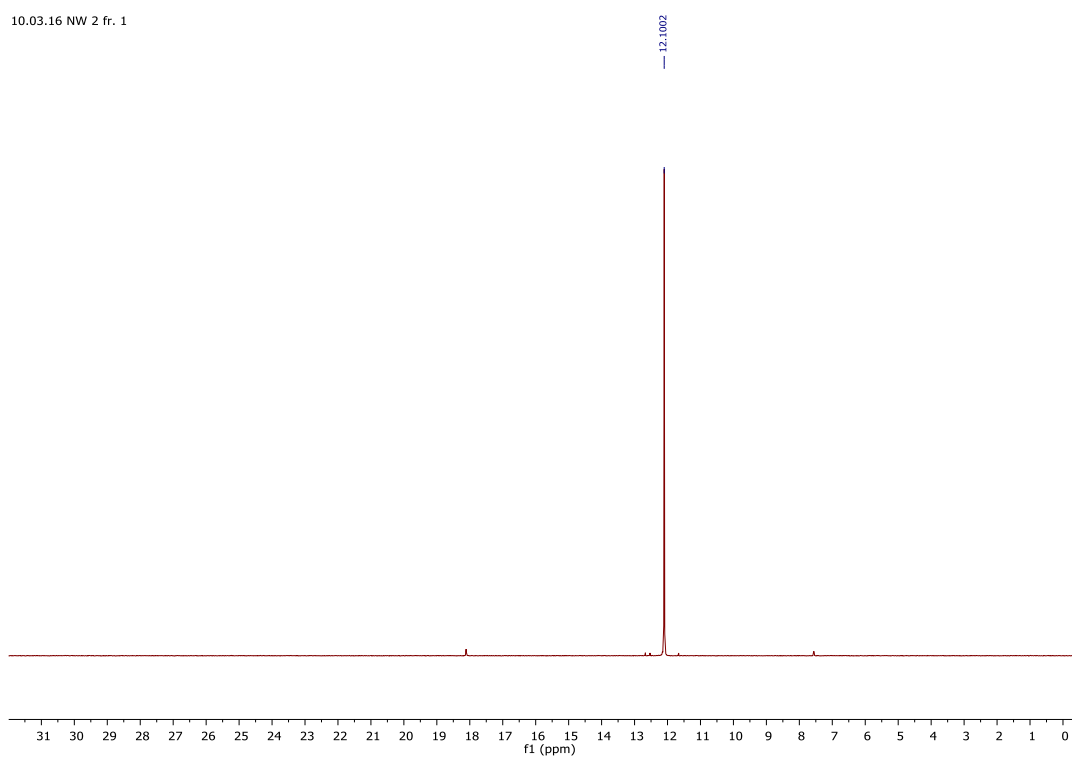

Figure S69: The  $^{31}\text{P}$  NMR spectra of the compound **16**

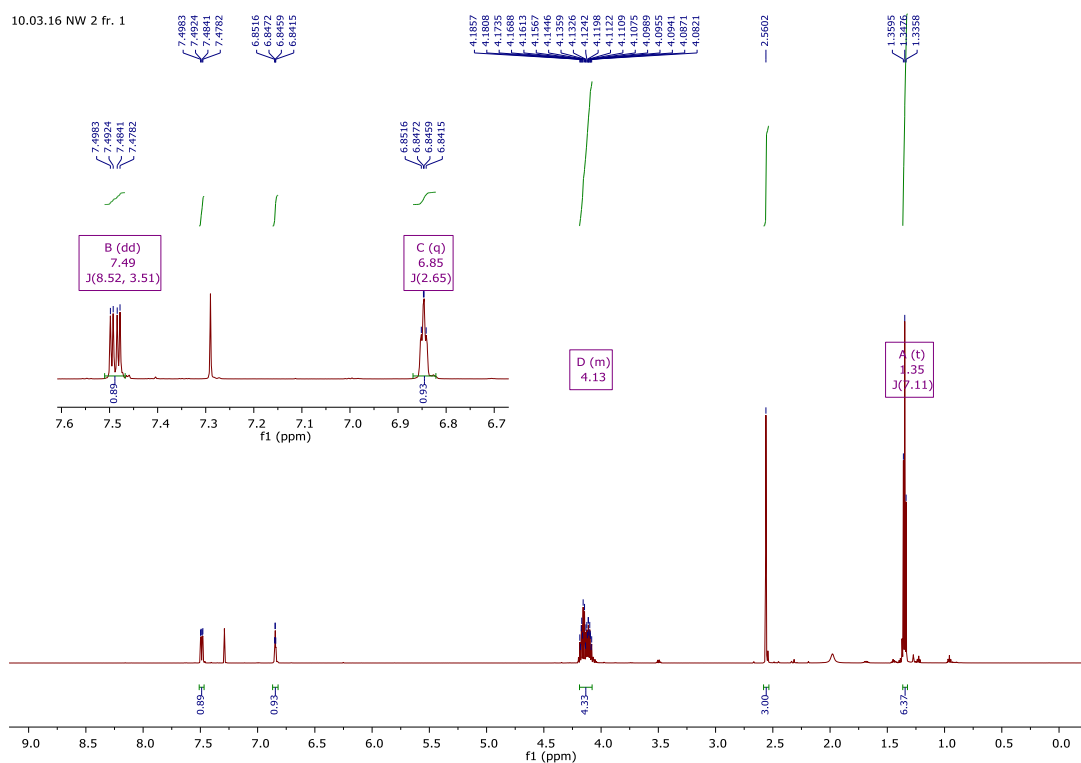

Figure S70: The  $^1\text{H}$  NMR spectra of the compound **16**

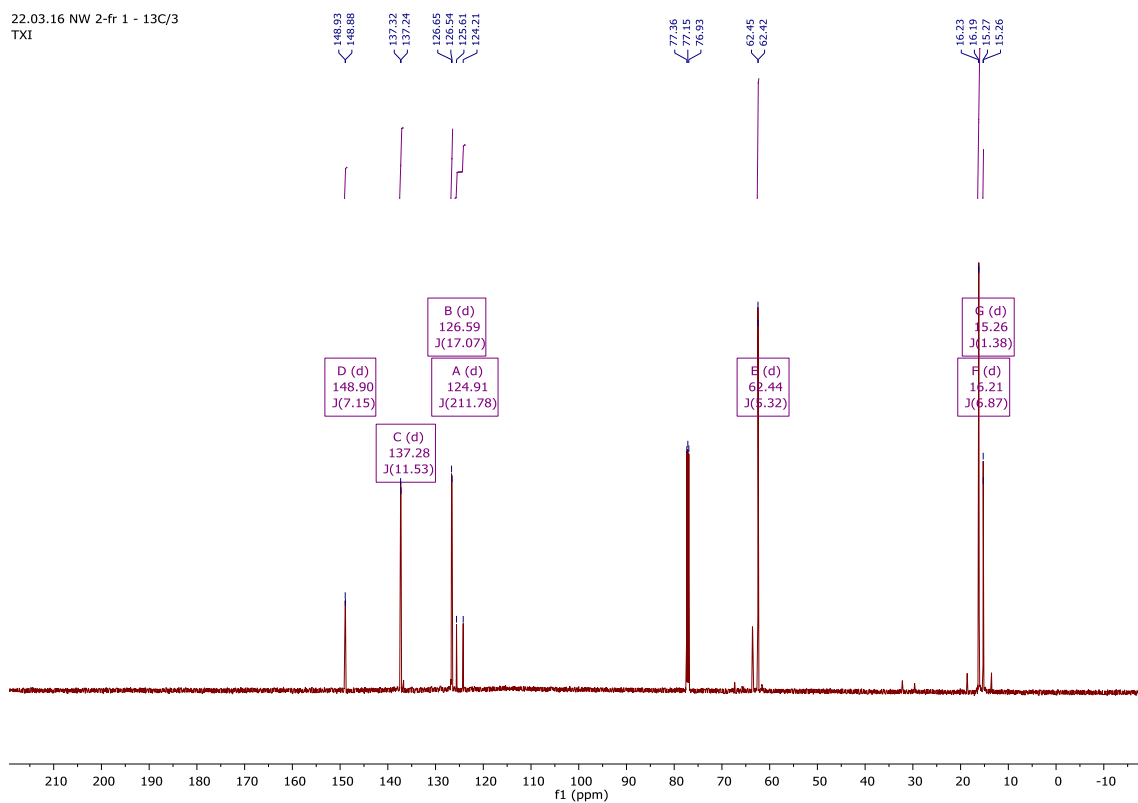

Figure S71: The  $^{13}\text{C}$  NMR spectra of the compound **16**

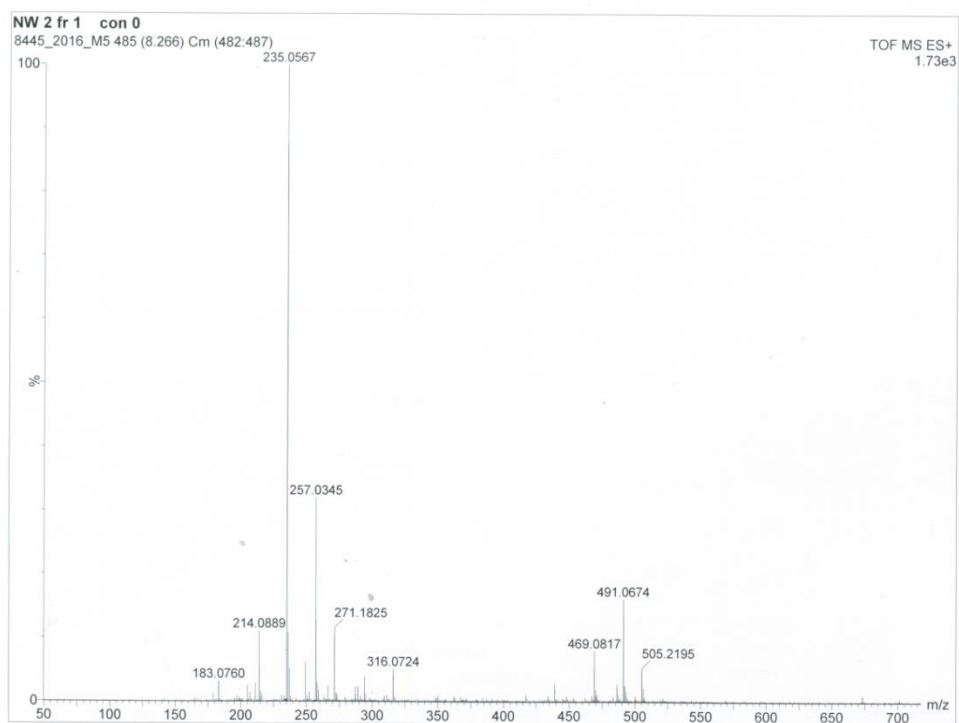

Figure S72: The HRMS spectra of the compound **16**

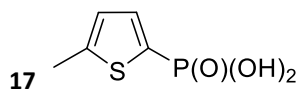

NW 2 fr 1 kwas  
NW 2 fr.1H  
31P NMR  
18/05/16

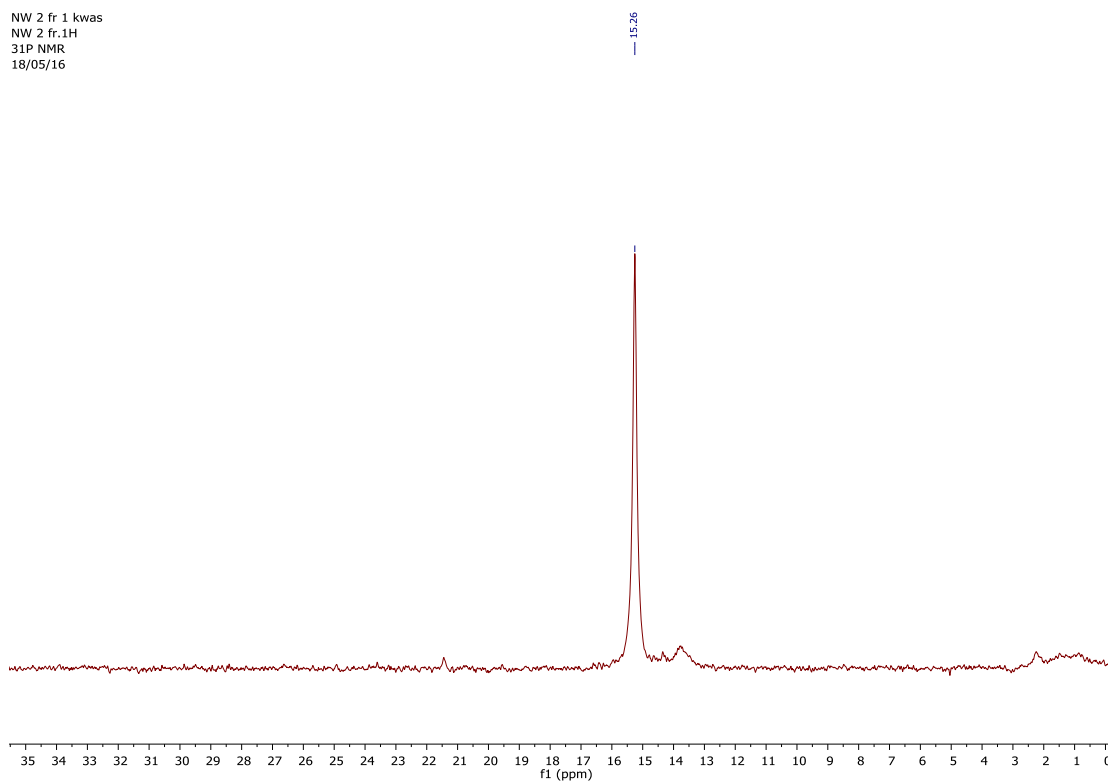

Figure S73: The  $^{31}\text{P}$  NMR spectra of the compound **17**



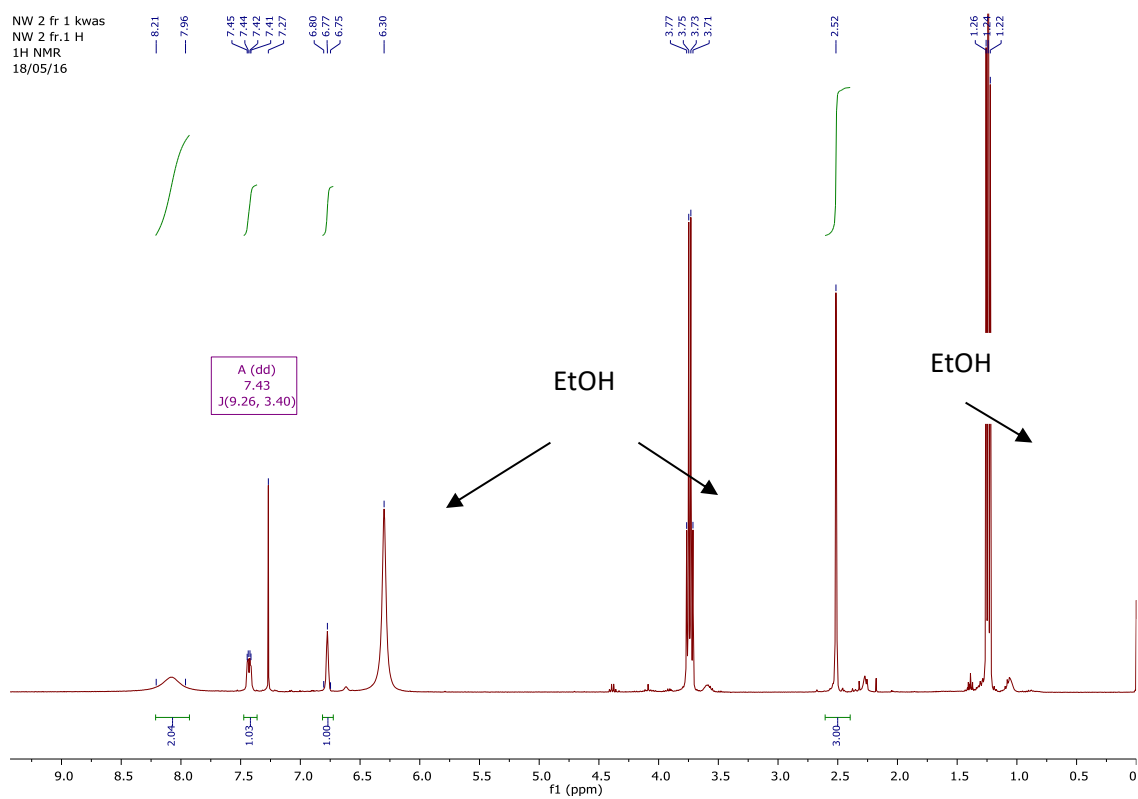

Figure S74: The  $^1\text{H}$  NMR spectra of the compound **17**

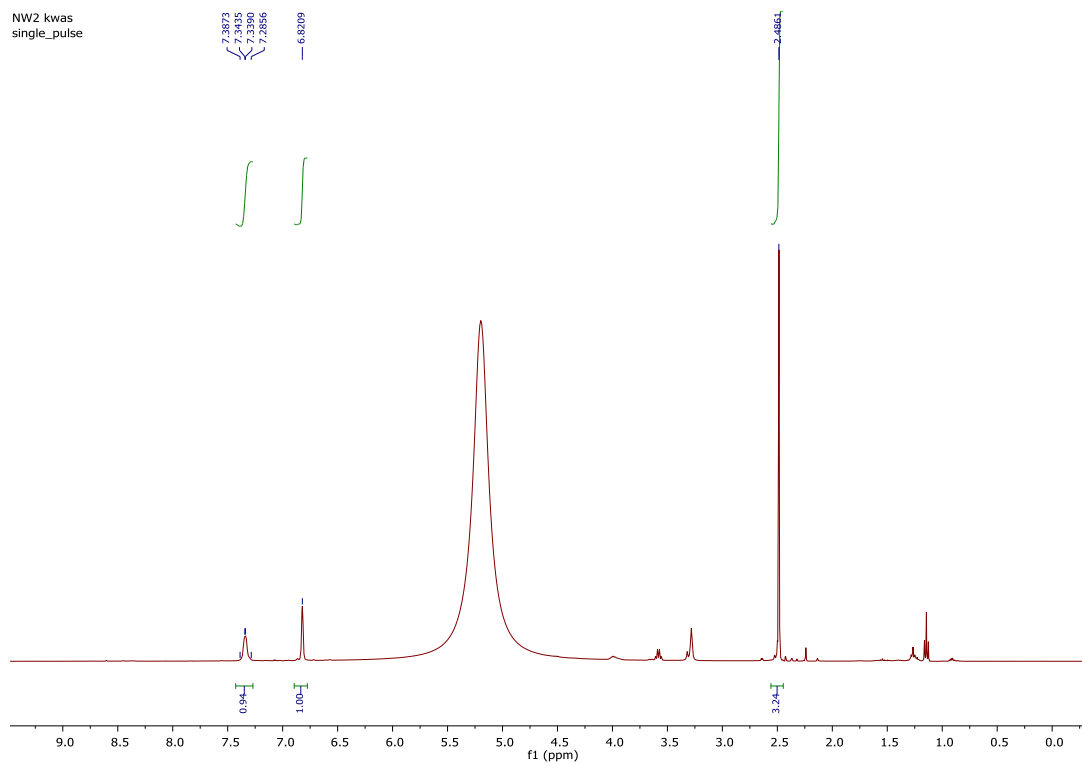

Figure S75: The  $^1\text{H}$  NMR spectra of the compound **17**

22.03.16 NW 2-fr 1 H- 13C (widać etanol)/3  
TXI

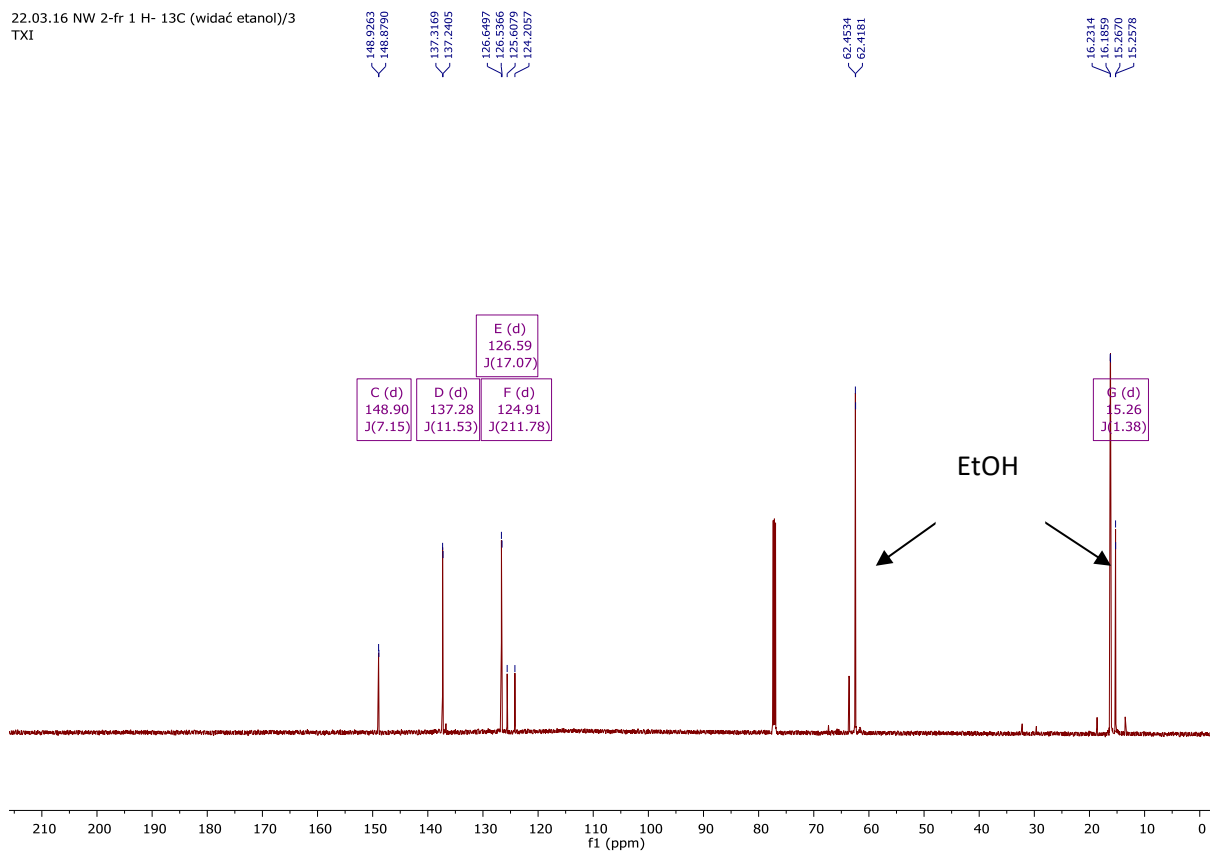

Figure S76: The  $^{13}\text{C}$  NMR spectra of the compound **17**

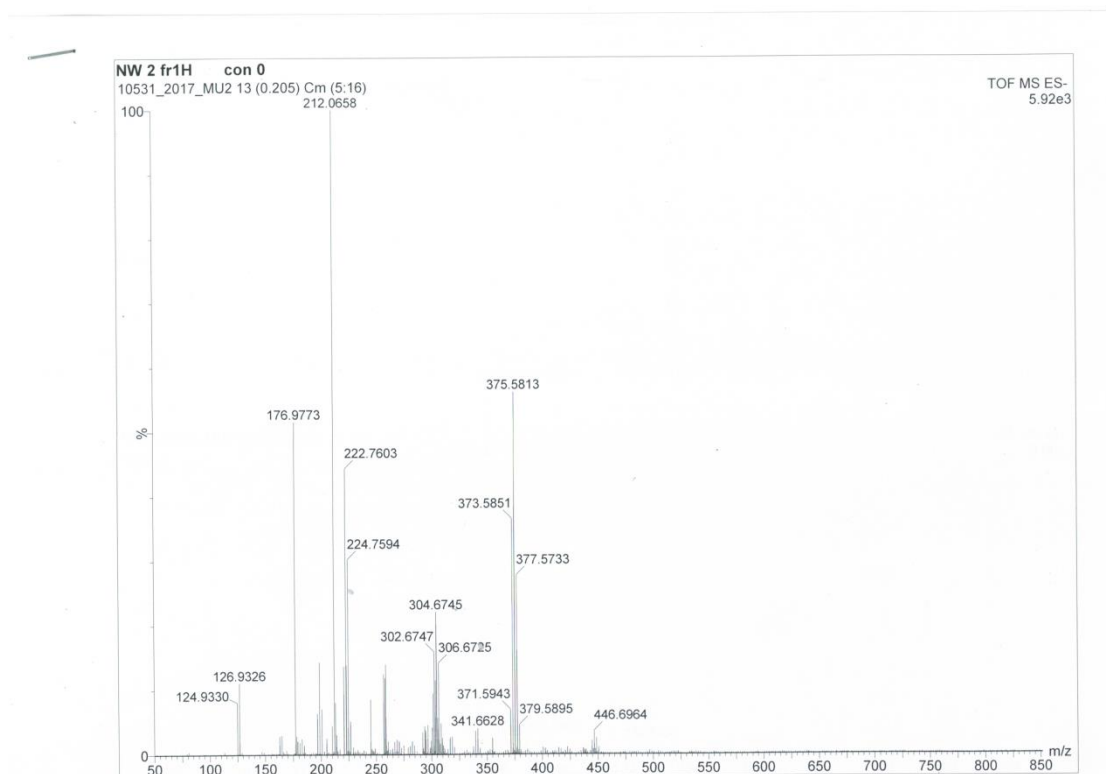

Figure S77: The CHRMMS spectra of the compound **17**

**Table S1: Relevant crystallographic data for the molecule and the full geometrical information (Å, °)**

|            |             |             |             |
|------------|-------------|-------------|-------------|
| <b>13</b>  |             |             |             |
| P1—O1      | 1.447 (3)   | C10—C11     | 1.437 (2)   |
| P1—C1      | 1.7930 (19) | C10—H10     | 0.9300      |
| P1—C17     | 1.7936 (19) | C11—C16     | 1.383 (2)   |
| P1—C9      | 1.7947 (19) | C11—C12     | 1.400 (2)   |
| O2—C8      | 1.382 (2)   | C12—C13     | 1.375 (3)   |
| O2—C1      | 1.404 (2)   | C12—H12     | 0.9300      |
| O3—C16     | 1.381 (2)   | C13—C14     | 1.386 (3)   |
| O3—C9      | 1.394 (2)   | C13—H13     | 0.9300      |
| O4—C24     | 1.380 (2)   | C14—C15     | 1.370 (2)   |
| O4—C17     | 1.384 (2)   | C14—H14     | 0.9300      |
| O5—H5A     | 1.08 (9)    | C15—C16     | 1.382 (2)   |
| O5—H5B     | 1.09 (7)    | C15—H15     | 0.9300      |
| C1—C2      | 1.338 (2)   | C17—C18     | 1.336 (2)   |
| C4—C5      | 1.374 (3)   | C18—C19     | 1.430 (2)   |
| C4—C3      | 1.406 (3)   | C18—H18     | 0.9300      |
| C4—H4      | 0.9300      | C19—C24     | 1.377 (2)   |
| C3—C8      | 1.382 (3)   | C19—C20     | 1.403 (3)   |
| C3—C2      | 1.437 (3)   | C20—C21     | 1.388 (3)   |
| C2—H2      | 0.9300      | C20—H20     | 0.9300      |
| C5—C6      | 1.388 (3)   | C21—C22     | 1.393 (3)   |
| C5—H5      | 0.9300      | C21—H21     | 0.9300      |
| C6—C7      | 1.382 (3)   | C22—C23     | 1.362 (3)   |
| C6—H6      | 0.9300      | C22—H22     | 0.9300      |
| C7—C8      | 1.382 (3)   | C23—C24     | 1.381 (3)   |
| C7—H7      | 0.9300      | C23—H23     | 0.9300      |
| C9—C10     | 1.342 (2)   |             |             |
| O1—P1—C1   | 115.48 (13) | C16—C11—C10 | 105.64 (16) |
| O1—P1—C17  | 119.54 (13) | C12—C11—C10 | 136.13 (19) |
| C1—P1—C17  | 101.55 (9)  | C13—C12—C11 | 118.49 (19) |
| O1—P1—C9   | 113.30 (13) | C13—C12—H12 | 120.8       |
| C1—P1—C9   | 103.49 (9)  | C11—C12—H12 | 120.8       |
| C17—P1—C9  | 101.24 (9)  | C12—C13—C14 | 121.31 (19) |
| C8—O2—C1   | 105.36 (15) | C12—C13—H13 | 119.3       |
| C16—O3—C9  | 105.62 (14) | C14—C13—H13 | 119.3       |
| C24—O4—C17 | 105.37 (14) | C15—C14—C13 | 121.65 (19) |
| H5A—O5—H5B | 113 (5)     | C15—C14—H14 | 119.2       |
| C2—C1—O2   | 110.94 (17) | C13—C14—H14 | 119.2       |
| C2—C1—P1   | 129.31 (17) | C14—C15—C16 | 116.28 (19) |
| O2—C1—P1   | 119.73 (14) | C14—C15—H15 | 121.9       |
| C5—C4—C3   | 118.3 (2)   | C16—C15—H15 | 121.9       |
| C5—C4—H4   | 120.9       | O3—C16—C15  | 125.58 (18) |
| C3—C4—H4   | 120.9       | O3—C16—C11  | 110.41 (16) |

|              |              |                 |              |
|--------------|--------------|-----------------|--------------|
| C8—C3—C4     | 118.5 (2)    | C15—C16—C11     | 124.01 (18)  |
| C8—C3—C2     | 105.92 (18)  | C18—C17—O4      | 111.12 (17)  |
| C4—C3—C2     | 135.5 (2)    | C18—C17—P1      | 134.34 (16)  |
| C1—C2—C3     | 107.37 (19)  | O4—C17—P1       | 114.53 (13)  |
| C1—C2—H2     | 126.3        | C17—C18—C19     | 107.51 (17)  |
| C3—C2—H2     | 126.3        | C17—C18—H18     | 126.2        |
| C4—C5—C6     | 121.5 (2)    | C19—C18—H18     | 126.2        |
| C4—C5—H5     | 119.2        | C24—C19—C20     | 118.01 (19)  |
| C6—C5—H5     | 119.2        | C24—C19—C18     | 105.40 (17)  |
| C7—C6—C5     | 121.6 (2)    | C20—C19—C18     | 136.6 (2)    |
| C7—C6—H6     | 119.2        | C21—C20—C19     | 118.1 (2)    |
| C5—C6—H6     | 119.2        | C21—C20—H20     | 120.9        |
| C6—C7—C8     | 116.1 (2)    | C19—C20—H20     | 120.9        |
| C6—C7—H7     | 122.0        | C20—C21—C22     | 120.7 (2)    |
| C8—C7—H7     | 122.0        | C20—C21—H21     | 119.6        |
| C3—C8—O2     | 110.40 (18)  | C22—C21—H21     | 119.6        |
| C3—C8—C7     | 124.1 (2)    | C23—C22—C21     | 122.5 (2)    |
| O2—C8—C7     | 125.5 (2)    | C23—C22—H22     | 118.8        |
| C10—C9—O3    | 110.96 (16)  | C21—C22—H22     | 118.8        |
| C10—C9—P1    | 130.01 (15)  | C22—C23—C24     | 115.4 (2)    |
| O3—C9—P1     | 118.88 (13)  | C22—C23—H23     | 122.3        |
| C9—C10—C11   | 107.33 (17)  | C24—C23—H23     | 122.3        |
| C9—C10—H10   | 126.3        | C19—C24—O4      | 110.58 (17)  |
| C11—C10—H10  | 126.3        | C19—C24—C23     | 125.2 (2)    |
| C16—C11—C12  | 118.22 (18)  | O4—C24—C23      | 124.1 (2)    |
| C8—O2—C1—C2  | 0.8 (2)      | C10—C11—C12—C13 | −179.1 (2)   |
| C8—O2—C1—P1  | 179.29 (13)  | C11—C12—C13—C14 | −0.6 (3)     |
| O1—P1—C1—C2  | 9.8 (2)      | C12—C13—C14—C15 | −1.3 (3)     |
| C17—P1—C1—C2 | −121.06 (19) | C13—C14—C15—C16 | 1.3 (3)      |
| C9—P1—C1—C2  | 134.24 (19)  | C9—O3—C16—C15   | −179.29 (17) |
| O1—P1—C1—O2  | −168.28 (17) | C9—O3—C16—C11   | 1.09 (19)    |
| C17—P1—C1—O2 | 60.81 (16)   | C14—C15—C16—O3  | −178.86 (17) |
| C9—P1—C1—O2  | −43.89 (16)  | C14—C15—C16—C11 | 0.7 (3)      |
| C5—C4—C3—C8  | 0.4 (3)      | C12—C11—C16—O3  | 177.03 (16)  |
| C5—C4—C3—C2  | 177.2 (2)    | C10—C11—C16—O3  | −1.8 (2)     |
| O2—C1—C2—C3  | −0.7 (2)     | C12—C11—C16—C15 | −2.6 (3)     |
| P1—C1—C2—C3  | −178.93 (14) | C10—C11—C16—C15 | 178.52 (17)  |
| C8—C3—C2—C1  | 0.2 (2)      | C24—O4—C17—C18  | 0.4 (2)      |
| C4—C3—C2—C1  | −176.9 (2)   | C24—O4—C17—P1   | 179.45 (12)  |
| C3—C4—C5—C6  | −0.4 (3)     | O1—P1—C17—C18   | −122.2 (2)   |
| C4—C5—C6—C7  | 0.6 (4)      | C1—P1—C17—C18   | 6.2 (2)      |
| C5—C6—C7—C8  | −0.6 (3)     | C9—P1—C17—C18   | 112.7 (2)    |
| C4—C3—C8—O2  | 177.98 (16)  | O1—P1—C17—O4    | 59.10 (19)   |
| C2—C3—C8—O2  | 0.3 (2)      | C1—P1—C17—O4    | −172.55 (13) |
| C4—C3—C8—C7  | −0.5 (3)     | C9—P1—C17—O4    | −66.08 (14)  |
| C2—C3—C8—C7  | −178.15 (18) | O4—C17—C18—C19  | 0.2 (2)      |
| C1—O2—C8—C3  | −0.7 (2)     | P1—C17—C18—C19  | −178.62 (15) |
| C1—O2—C8—C7  | 177.74 (19)  | C17—C18—C19—C24 | −0.7 (2)     |

|                 |              |                 |              |
|-----------------|--------------|-----------------|--------------|
| C6—C7—C8—C3     | 0.6 (3)      | C17—C18—C19—C20 | 178.7 (2)    |
| C6—C7—C8—O2     | -177.61 (18) | C24—C19—C20—C21 | 0.0 (3)      |
| C16—O3—C9—C10   | 0.2 (2)      | C18—C19—C20—C21 | -179.3 (2)   |
| C16—O3—C9—P1    | -175.86 (12) | C19—C20—C21—C22 | 0.9 (3)      |
| O1—P1—C9—C10    | 17.1 (2)     | C20—C21—C22—C23 | -1.0 (3)     |
| C1—P1—C9—C10    | -108.72 (19) | C21—C22—C23—C24 | 0.2 (3)      |
| C17—P1—C9—C10   | 146.35 (18)  | C20—C19—C24—O4  | -178.54 (16) |
| O1—P1—C9—O3     | -167.76 (16) | C18—C19—C24—O4  | 0.9 (2)      |
| C1—P1—C9—O3     | 66.44 (15)   | C20—C19—C24—C23 | -0.9 (3)     |
| C17—P1—C9—O3    | -38.49 (15)  | C18—C19—C24—C23 | 178.6 (2)    |
| O3—C9—C10—C11   | -1.3 (2)     | C17—O4—C24—C19  | -0.9 (2)     |
| P1—C9—C10—C11   | 174.16 (14)  | C17—O4—C24—C23  | -178.54 (19) |
| C9—C10—C11—C16  | 1.9 (2)      | C22—C23—C24—C19 | 0.8 (3)      |
| C9—C10—C11—C12  | -176.7 (2)   | C22—C23—C24—O4  | 178.13 (19)  |
| C16—C11—C12—C13 | 2.5 (3)      |                 |              |
| <b>15</b>       |              |                 |              |
| P1—O1           | 1.4843 (16)  | C3—H3           | 0.9300       |
| P1—C5           | 1.774 (2)    | C4—H4           | 0.9300       |
| P1—C9           | 1.777 (2)    | C5—C6           | 1.355 (3)    |
| P1—C1           | 1.788 (2)    | C6—C7           | 1.423 (4)    |
| O2—C4           | 1.372 (3)    | C6—H6           | 0.9300       |
| O2—C1           | 1.380 (2)    | C7—C8           | 1.341 (4)    |
| O3—C8           | 1.357 (3)    | C7—H7           | 0.9300       |
| O3—C5           | 1.377 (3)    | C8—H8           | 0.9300       |
| O4—C12          | 1.366 (3)    | C9—C10          | 1.345 (4)    |
| O4—C9           | 1.374 (3)    | C10—C11         | 1.420 (4)    |
| C1—C2           | 1.340 (3)    | C10—H10         | 0.9300       |
| C2—C3           | 1.425 (3)    | C11—C12         | 1.332 (4)    |
| C2—H2           | 0.9300       | C11—H11         | 0.9300       |
| C3—C4           | 1.339 (3)    | C12—H12         | 0.9300       |
| O1—P1—C5        | 115.84 (11)  | O3—C5—P1        | 115.52 (15)  |
| O1—P1—C9        | 111.50 (11)  | C5—C6—C7        | 106.4 (2)    |
| C5—P1—C9        | 104.79 (11)  | C5—C6—H6        | 126.8        |
| O1—P1—C1        | 110.82 (10)  | C7—C6—H6        | 126.8        |
| C5—P1—C1        | 105.84 (11)  | C8—C7—C6        | 106.5 (2)    |
| C9—P1—C1        | 107.50 (11)  | C8—C7—H7        | 126.7        |
| C4—O2—C1        | 105.79 (16)  | C6—C7—H7        | 126.7        |
| C8—O3—C5        | 106.22 (17)  | C7—C8—O3        | 111.0 (2)    |
| C12—O4—C9       | 106.0 (2)    | C7—C8—H8        | 124.5        |
| C2—C1—O2        | 110.05 (18)  | O3—C8—H8        | 124.5        |
| C2—C1—P1        | 132.50 (17)  | C10—C9—O4       | 109.8 (2)    |
| O2—C1—P1        | 117.42 (15)  | C10—C9—P1       | 129.7 (2)    |
| C1—C2—C3        | 107.03 (19)  | O4—C9—P1        | 120.43 (18)  |
| C1—C2—H2        | 126.5        | C9—C10—C11      | 106.7 (2)    |
| C3—C2—H2        | 126.5        | C9—C10—H10      | 126.6        |
| C4—C3—C2        | 106.3 (2)    | C11—C10—H10     | 126.6        |
| C4—C3—H3        | 126.8        | C12—C11—C10     | 106.6 (2)    |

|             |              |                |             |
|-------------|--------------|----------------|-------------|
| C2—C3—H3    | 126.8        | C12—C11—H11    | 126.7       |
| C3—C4—O2    | 110.8 (2)    | C10—C11—H11    | 126.7       |
| C3—C4—H4    | 124.6        | C11—C12—O4     | 110.8 (2)   |
| O2—C4—H4    | 124.6        | C11—C12—H12    | 124.6       |
| C6—C5—O3    | 109.8 (2)    | O4—C12—H12     | 124.6       |
| C6—C5—P1    | 134.64 (19)  |                |             |
| C4—O2—C1—C2 | 0.3 (2)      | C1—P1—C5—O3    | −62.84 (18) |
| C4—O2—C1—P1 | −178.03 (17) | O3—C5—C6—C7    | 0.3 (3)     |
| O1—P1—C1—C2 | −7.3 (3)     | P1—C5—C6—C7    | −179.7 (2)  |
| C5—P1—C1—C2 | 119.0 (3)    | C5—C6—C7—C8    | −0.3 (3)    |
| C9—P1—C1—C2 | −129.4 (3)   | C6—C7—C8—O3    | 0.1 (3)     |
| O1—P1—C1—O2 | 170.58 (15)  | C5—O3—C8—C7    | 0.1 (3)     |
| C5—P1—C1—O2 | −63.07 (18)  | C12—O4—C9—C10  | 1.0 (3)     |
| C9—P1—C1—O2 | 48.5 (2)     | C12—O4—C9—P1   | 178.51 (18) |
| O2—C1—C2—C3 | −0.4 (3)     | O1—P1—C9—C10   | −9.1 (3)    |
| P1—C1—C2—C3 | 177.62 (19)  | C5—P1—C9—C10   | −135.2 (2)  |
| C1—C2—C3—C4 | 0.3 (3)      | C1—P1—C9—C10   | 112.5 (3)   |
| C2—C3—C4—O2 | −0.1 (3)     | O1—P1—C9—O4    | 173.96 (18) |
| C1—O2—C4—C3 | −0.1 (3)     | C5—P1—C9—O4    | 47.9 (2)    |
| C8—O3—C5—C6 | −0.3 (2)     | C1—P1—C9—O4    | −64.4 (2)   |
| C8—O3—C5—P1 | 179.76 (16)  | O4—C9—C10—C11  | −1.0 (3)    |
| O1—P1—C5—C6 | −119.5 (2)   | P1—C9—C10—C11  | −178.2 (2)  |
| C9—P1—C5—C6 | 3.8 (3)      | C9—C10—C11—C12 | 0.6 (3)     |
| C1—P1—C5—C6 | 117.2 (3)    | C10—C11—C12—O4 | 0.0 (3)     |
| O1—P1—C5—O3 | 60.38 (19)   | C9—O4—C12—C11  | −0.6 (3)    |
| C9—P1—C5—O3 | −176.31 (16) |                |             |

Table S2: Selected hydrogen-bond parameters

| <i>D</i> —H... <i>A</i>   | <i>D</i> —H (Å) | H... <i>A</i> (Å) | <i>D</i> ... <i>A</i> (Å) | <i>D</i> —H... <i>A</i> (°) |
|---------------------------|-----------------|-------------------|---------------------------|-----------------------------|
| <b>13</b>                 |                 |                   |                           |                             |
| O5—H5A...O1 <sup>i</sup>  | 1.08 (9)        | 1.91 (9)          | 2.862 (3)                 | 145 (7)                     |
| C2—H2...O5                | 0.93            | 2.45              | 3.190 (3)                 | 136.5                       |
| <b>15</b>                 |                 |                   |                           |                             |
| C2—H2...O2 <sup>ii</sup>  | 0.93            | 2.44              | 3.348 (3)                 | 165.6                       |
| C4—H4...O1 <sup>iii</sup> | 0.93            | 2.49              | 3.286 (3)                 | 143.5                       |
| C7—H7...O3 <sup>iv</sup>  | 0.93            | 2.65              | 3.342 (3)                 | 132.1                       |
| C6—H6...O1 <sup>v</sup>   | 0.93            | 2.47              | 3.373 (3)                 | 164.7                       |
| C8—H8...O1 <sup>vi</sup>  | 0.93            | 2.39              | 3.264 (3)                 | 155.7                       |

Symmetry code(s): (i)  $y+1/3, -x+y+2/3, -z+2/3$ ; (ii)  $-x+1, y+1/2, -z+1/2$ ; (iii)  $-x+1, y-1/2, -z+1/2$ ; (iv)  $x+1/2, -y+1/2, -z+1$ ; (v)  $-x+2, y-1/2, -z+1/2$ ; (vi)  $-x+3/2, -y+1, z+1/2$ .
